# Supplementary material for: Significant Comparative Characteristics between Orphan and Nonorphan Genes in the Rice (Oryza sativa L.) Genome
Source: Comp Funct Genomics. 2007 Sep 18;2007:21676. doi: 10.1155/2007/21676 (PMC2216055; doi:10.1155/2007/21676)
Supplement: Supplementary file 1 — The orphan and nonorphan genes are concluded using NCBI-BLAST program as described in the materials and methods section in the paper. The front part of table is the 1926 orphan genes and later is the 20439 nonorphan genes. The gene name column in the table is the TIGR's model name and the description column is TIGR annotation. The sequences of each gene can be used as base sequences to design microsatellite marker primers for genetic analysis and molecular marker assistant breeding. Markers deduced from orphan genes should be more efficient and that from nonorphan genes less efficient according to the inferences in the discussion and conclusion sections in the paper. [file 21676.f1.xls]

## Sheet: rice nonorphan genes
Orphan genes in the TIGR annotation dataset
TIGR model name	GENBANK Accession	Descreptions
9629.m04392	AP002910	ADP/ATP carrier protein family, putative
9630.m01373	AP005004	hypothetical protein
9630.m03083	AP004777	expressed protein
9631.m00293	AP000615	probable adenylate kinase 1, chloroplast precursor (ec 2.7.4.3) (atp-amp transphosphorylase)
9631.m04856	AC091775	putative oxysterol binding protein
9632.m03055	AL731600	oxidoreductase, short chain dehydrogenase/reductase family, putative
9633.m00131	AC079356	Similar to zinc finger protein OBP3 [imported] - Arabidopsis thaliana
9633.m04542	AC144735	Glycosyltransferase family 43, putative
9636.m03301	AP004463	expressed protein
9636.m03363	AP003868	retrotransposon protein, putative, unclassified
9636.m03372	AP004666	expressed protein
9636.m03427	AP004703	CCR4-associated factor, putative
9636.m03503	AP003798	pectinesterase homolog F4I10.150 - Arabidopsis thaliana
9636.m03656	AP004585	Similar to zinc finger protein ID1, putative
9636.m03665	AP004585	nitrate reductase [nadh] 1 (ec 1.7.1.1) (nr1)
9636.m03736	AP004154	Patatin-like phospholipase, putative
9636.m03740	AP003917	patatin-like protein
9636.m03831	AP004557	heat-shock protein, 82K, precursor - rye
9636.m03841	AP004557	F21F23.7 protein - Arabidopsis thaliana
9636.m03855	AP004620	expressed protein
9636.m03857	AP004620	histone H2B
9636.m03858	AP004620	hypothetical protein
9636.m03874	AP004762	RING zinc finger protein-like protein, putative
9636.m03927	AP000364	O-methyltransferase
9636.m03952	AP003873	Similar to heat shock protein 82
9636.m03963	AP003892	Protein kinase domain, putative
9636.m03986	AP003883	AN1-like Zinc finger, putative
9636.m04004	AP005245	transcription factor RAU1
9636.m04142	AP005509	oligouridylate binding protein, putative
9636.m04155	AP003865	Zn-finger in Ran binding protein and others, putative
9636.m04277	AP005529	retrotransposon protein, putative, Ty1-copia sub-class
9636.m04390	AP004632	expressed protein
9636.m04418	AP004704	cytochrome P450 CYP78A9 homolog F21F14.50 [similarity] - Arabidopsis thaliana
9637.m00057	AP005591	aldose 1-epimerase-like protein
9636.m03320	AP003898	expressed protein
9636.m03321	AP003898	expressed protein
9636.m03332	AP004617	Ulp1 protease family, C-terminal catalytic domain, putative
9636.m03345	AP003881	expressed protein
9636.m03351	AP003881	dihydrolipoamide S-acetyltransferase
9636.m03412	AP005159	Similar to F25A4.34 [imported] - Arabidopsis thaliana
9636.m03442	AP004703	hypothetical protein
9636.m03449	AP004764	LRR receptor protein kinase, putative
9636.m03459	AP004764	expressed protein
9636.m03487	AP004665	expressed protein
9636.m03513	AP003798	expressed protein
9636.m03532	AP003871	retrotransposon protein, putative, Ty1-copia sub-class
9636.m03590	AP004586	DNA excision repair protein
9636.m03641	AP006461	hypothetical protein
9636.m03729	AP004154	phosphoglycerate mutase-like protein
9636.m03744	AP003917	Helix-loop-helix DNA-binding domain, putative
9636.m03784	AP004213	blue copper protein
9636.m03913	AP000364	BURP domain, putative
9636.m03917	AP000364	CRAL/TRIO, N-terminus, putative
9636.m04024	AP005816	expressed protein
9636.m04033	AP006049	Glycosyl hydrolase family 1
9636.m04041	AP006049	potassium uptake protein
9636.m04051	AP006049	retrotransposon protein, putative, unclassified
9636.m04156	AP003865	Zn-finger in Ran binding protein and others, putative
9636.m04191	AP003888	expressed protein
9636.m04292	AP005528	Auxin responsive protein, putative
9636.m04344	AP004592	NBS-LRR type resistance gene
9636.m04382	AP003914	NB-ARC domain, putative
9636.m04447	AP003912	Zinc finger, C3HC4 type (RING finger), putative
9636.m04505	AP005480	dihydroneopterin aldolase
9636.m04530	AP005524	Similar to At3g52220
9636.m04538	AP005524	Similar to gibberellin action negative regulator SPY
9636.m04584	AP004587	lob domain protein 29. [mouse-ear cress
9636.m04587	AP004623	transposon protein, putative, CACTA, En/Spm sub-class
9637.m00007	AP005909	expressed protein
9637.m00116	AP005569	retrotransposon protein, putative, unclassified
9637.m00194	AP005563	retrotransposon protein, putative, unclassified
9637.m00277	AP005585	Similar to DNA helicase
9637.m00317	AP005894	GDSL-motif lipase/hydrolase, putative
9637.m00342	AP005583	retrotransposon protein, putative, unclassified
9636.m03316	AP005734	retrotransposon protein, putative, Ty3-gypsy sub-class
9636.m03331	AP004617	FAR1 family, putative
9636.m03521	AP003871	IBR domain, putative
9636.m03589	AP004586	transposon protein, putative, CACTA, En/Spm sub-class
9636.m03647	AP006461	Cytochrome P450
9636.m03673	AP004585	Similar to T26F17.12
9636.m03709	AP004399	AP2 domain, putative
9636.m03714	AP004399	expressed protein
9636.m03815	AP004376	Similar to At4g39970/T5J17_140
9636.m03869	AP004762	Similar to ribonucleoprotein
9636.m03969	AP003892	aminotransferase 1
9636.m04084	AP004761	retrotransposon protein, putative, Ty3-gypsy sub-class
9636.m04100	AP004761	calcium-translocating P-type ATPase, PMCA-type
9636.m04123	AP004622	hypothetical protein
9636.m04133	AP004622	retrotransposon protein, putative, unclassified
9636.m04137	AP005509	pumilio domain-containing protein PPD1
9636.m04210	AP003857	expressed protein
9636.m04211	AP003857	expressed protein
9636.m04213	AP003857	Nitrate-induced NOI protein, putative
9636.m04315	AP005439	expressed protein
9636.m04336	AP004592	DHHC zinc finger domain, putative
9636.m04338	AP004592	Zinc finger, C3HC4 type (RING finger), putative
9636.m04351	AP003948	expressed protein
9636.m04389	AP004632	ABC transporter, putative
9636.m04395	AP004632	expressed protein
9636.m04397	AP004632	sorbitol dehydrogenase, putative
9636.m04405	AP004163	BAG domain, putative
9636.m04484	AP004044	Plant protein family, putative
9636.m04493	AP005480	endomembrane protein 70, putative
9636.m04507	AP003928	Similar to At4g15680
9636.m04514	AP003928	Ser/Thr protein phosphatase, putative
9636.m04543	AP005524	expressed protein
9636.m04563	AP005544	nodulin, putative
9636.m04599	AP004623	expressed protein
9636.m04606	AP004623	Glutaredoxin, putative
9636.m04613	AP005411	expressed protein
9637.m00493	AP005587	expressed protein
9637.m00498	AP005587	expressed protein
9637.m00512	AP005578	expressed protein
9637.m00610	AP005589	phosphatidylinositol-phosphatidylcholine transfer protein SEC14 homolog Ssh1 - soybean
9636.m03444	AP004764	strictosidine synthase, putative
9636.m03448	AP004764	hypothetical protein
9636.m03464	AP004764	transposon protein, putative, CACTA, En/Spm sub-class
9636.m03469	AP004564	trehalose-6-phosphate synthase homolog F17O7.18 - Arabidopsis thaliana
9636.m03523	AP003871	subtilisin-like serine protease
9636.m03625	AP005405	Plant viral-response family, putative
9636.m03671	AP004585	chloroplast nucleoid DNA binding protein, putative
9636.m03726	AP004399	hypothetical protein
9636.m03743	AP003917	expressed protein
9636.m03750	AP003917	Similar to ubiquitin-specific protease 16
9636.m03771	AP005391	retrotransposon protein, putative, Ty3-gypsy sub-class
9636.m03785	AP004213	Similar to umecyanin (umc)
9636.m03802	AP005918	phi-1
9636.m03872	AP004762	Contains similarity to gb|AB011110 KIAA0538 protein from Homo sapiens brain and to phospholipid-binding domain C2 PF|00168. ESTs gb|AA585988 and gb|T04384 come from this gene.
9636.m03924	AP000364	expressed protein
9636.m03925	AP000364	O-methyltransferase
9636.m03936	AP003873	probable wrky transcription factor 2 (wrky dna-binding protein 2)
9636.m03945	AP003873	COP9 complex subunit 6
9636.m03947	AP003873	expressed protein
9636.m03982	AP003883	expressed protein
9636.m04000	AP005245	Similar to receptor-like protein kinase - Arabidopsis thaliana
9636.m04042	AP006049	oxidoreductase, short chain dehydrogenase/reductase family
9636.m04067	AP004765	ser/thr protein phosphatase catalytic subunit-like protein
9636.m04072	AP004765	expressed protein
9636.m04114	AP004708	retrotransposon protein, putative, Ty1-copia sub-class
9636.m04189	AP003887	expressed protein
9636.m04245	AP003920	AT5g14180/MUA22_18
9636.m04246	AP003920	uridine kinase, putative
9636.m04256	AP003920	expressed protein
9636.m04262	AP005529	MADS box protein - rice
9636.m04266	AP005529	glutamate-1-semialdehyde-2,1-aminomutase
9636.m04298	AP005528	expressed protein
9636.m04381	AP003914	anthranilate N-benzoyltransferase
9636.m04401	AP004632	Similar to At5g52030/MSG15_11
9636.m04408	AP004163	Ara4-interacting protein
9636.m04432	AP006265	retrotransposon protein, putative, Ty1-copia sub-class
9636.m04522	AP003928	Inosine-uridine preferring nucleoside hydrolase
9636.m04534	AP005524	expressed protein
9636.m04564	AP005544	expressed protein
9637.m00698	AP005829	hypothetical protein
9636.m03429	AP004703	MIR domain, putative
9636.m03432	AP004703	Fatty acid desaturase, putative
9636.m03517	AP003871	retrotransposon protein, putative, unclassified
9636.m03543	AP004662	retrotransposon protein, putative, Ty3-gypsy sub-class
9636.m03629	AP005405	transposon protein, putative, CACTA, En/Spm sub-class
9636.m03701	AP004457	Similar to Fuct c3 protein
9636.m03794	AP004213	Similar to probable RING zinc finger protein [imported] - Arabidopsis thaliana
9636.m03796	AP005918	expressed protein
9636.m03842	AP004557	F21F23.7 protein - Arabidopsis thaliana
9636.m03851	AP004620	transposon protein, putative, CACTA, En/Spm sub-class
9636.m03923	AP000364	expressed protein
9636.m03955	AP003892	phosphoribosylglycinamide formyltransferase, putative
9636.m03966	AP003892	Fasciclin domain, putative
9636.m03985	AP003883	RNA recognition motif. (a.k.a. RRM, RBD, or RNP domain), putative
9636.m03998	AP003883	Leucine Rich Repeat, putative
9636.m04026	AP005816	Similar to ethylene-insensitive3-like 3 protein
9636.m04043	AP006049	ENT domain, putative
9636.m04116	AP004622	AL161553 receptor protein kinase-like protein
9636.m04163	AP003865	expressed protein
9636.m04221	AP003857	ubiquitin-specific protease 1 (UBP1), putative
9636.m04249	AP003920	Exo70 exocyst complex subunit
9636.m04250	AP003920	Oxidoreductase molybdopterin binding domain, putative
9636.m04257	AP003920	expressed protein
9636.m04258	AP003920	expressed protein
9636.m04276	AP005529	probable uridylyl transferase [imported] - Arabidopsis thaliana
9636.m04278	AP005528	F4N2.2
9636.m04285	AP005528	retrotransposon protein, putative, unclassified
9636.m04313	AP005439	nam-like protein 22
9636.m04318	AP005439	CONSTANS-like B-box zinc finger protein, putative
9636.m04333	AP004464	expressed protein
9636.m04334	AP004592	Retinoblastoma-associated protein A domain, putative
9636.m04335	AP004592	expressed protein
9636.m04372	AP003914	expressed protein
9636.m04374	AP003914	Similar to RNA-binding protein
9636.m04380	AP003914	anthranilate N-benzoyltransferase
9636.m04417	AP004704	GTPase activator protein of Rab-like small GTPases-like protein
9636.m04470	AP005251	expressed protein
9636.m04513	AP003928	RNA-binding protein 3
9636.m04520	AP003928	fatty acyl coA reductase
9636.m04575	AP004587	4537-10989
9636.m04615	AP005411	probable type 1 membrane protein [imported] - Arabidopsis thaliana
9636.m04637	AP005410	transposon protein, putative, CACTA, En/Spm sub-class
9637.m00006	AP005909	expressed protein
9637.m00927	AP006464	retrotransposon protein, putative, Ty1-copia sub-class
9637.m00958	AP005839	transposon protein, putative, CACTA, En/Spm sub-class
9637.m01160	AP005782	GONST4 Golgi Nucleotide sugar transporter
9636.m03346	AP003881	UVB-resistance protein-like - Arabidopsis thaliana
9636.m03394	AP005159	Zinc finger, C3HC4 type (RING finger), putative
9636.m03437	AP004703	expressed protein
9636.m03591	AP004586	expressed protein
9636.m03609	AP004707	F-box domain, putative
9636.m03662	AP004585	expressed protein
9636.m03680	AP004693	Eukaryotic-type carbonic anhydrase
9636.m03780	AP005391	3,4-dihydroxy-2-butanone 4-phosphate synthase, putative
9636.m03808	AP005918	Zinc finger, C2H2 type, putative
9636.m03821	AP004376	expressed protein
9636.m03847	AP004620	Similar to probable DNA-binding protein T6L1.19 [imported] - Arabidopsis thaliana
9636.m03861	AP004620	protein T22C5.21 [imported] - Arabidopsis thaliana
9636.m03935	AP003873	probable wrky transcription factor 2 (wrky dna-binding protein 2)
9636.m03964	AP003892	expressed protein
9636.m03970	AP003892	BAF60b domain of the SWIB complex, putative
9636.m03977	AP004190	Similar to sodium-dicarboxylate cotransporter
9636.m04003	AP005245	transposon protein, putative, mariner sub-class
9636.m04075	AP004765	Similar to lectin-like protein kinase
9636.m04077	AP004765	hypothetical protein
9636.m04103	AP004761	expressed protein
9636.m04117	AP004622	retrotransposon protein, putative, unclassified
9636.m04140	AP005509	RNA pseudouridylate synthase, putative
9636.m04172	AP003865	transposon protein, putative, mariner sub-class
9636.m04176	AP003865	transposon protein, putative, CACTA, En/Spm sub-class
9636.m04202	AP003888	peptidyl-prolyl cis-trans isomerase, FKBP-type, putative
9636.m04230	AP004015	expressed protein
9636.m04234	AP004015	Similar to At5g36290
9636.m04350	AP003948	calcium-dependent protein kinase (EC 2.7.1.-) 1 - Arabidopsis thaliana
9636.m04407	AP004163	Similar to anther specific protein
9636.m04436	AP003912	peroxisome type ascorbate peroxidase
9636.m04527	AP005524	Similar to kinesin heavy chain
9636.m04529	AP005524	retrotransposon protein, putative, unclassified
9637.m00005	AP005909	expressed protein
9637.m00056	AP005591	hypothetical protein
9637.m00070	AP005709	cyclase, putative
9637.m01260	AP005684	AC004260 Putative monosaccharide transport protein
9637.m01428	AP005554	cysteine desulfurase, mitochondrial precursor (ec 4.4.1.-)
9636.m03318	AP005734	F-box domain, putative
9636.m03438	AP004703	expressed protein
9636.m03440	AP004703	chorismate mutase
9636.m03531	AP003871	Similar to DnaJ protein, putative
9636.m03569	AP005483	retrotransposon protein, putative, unclassified
9636.m03733	AP004154	Patatin-like phospholipase, putative
9636.m03752	AP004643	Mitochondrial carrier protein, putative
9636.m03776	AP005391	Homeobox associated leucine zipper, putative
9636.m03812	AP004376	expressed protein
9636.m03837	AP004557	Similar to At1g73880
9636.m03902	AP005148	alkaline alpha-galactosidase seed imbibition protein
9636.m03996	AP003883	polygalacturonase inhibitor-like protein
9636.m04035	AP006049	SBP domain, putative
9636.m04061	AP004765	AY088429 Rab geranylgeranyltransferase, beta subunit
9636.m04215	AP003857	hypothetical protein
9636.m04306	AP005528	MtN3
9636.m04420	AP004704	Similar to kinesin heavy chain
9636.m04438	AP003912	acyl carrier protein, putative
9636.m04500	AP005480	expressed protein
9636.m04518	AP003928	Pyridine nucleotide-disulphide oxidoreductase, putative
9636.m04540	AP005524	dihydroxy-acid dehydratase
9636.m04573	AP004587	acyltransferase-like protein
9636.m04583	AP004587	bet1-like snare 1-1 (atbet11) (bet1/sft1-like snare 14a) (atbs14a)
9636.m04605	AP004623	YDG/SRA domain, putative
9636.m04611	AP005411	expressed protein
9637.m00054	AP005591	retrotransposon protein, putative, Ty3-gypsy sub-class
9637.m00084	AP005709	expressed protein
9637.m00174	AP005746	transposon protein, putative, CACTA, En/Spm sub-class
9637.m00254	AP005585	transposon protein, putative, CACTA, En/Spm sub-class
9637.m01514	AP005700	Similar to At4g27500/F27G19_100
9637.m01616	AP006188	Similar to OsD305
9636.m03323	AP003898	linker histone H1 and H5 family, putative
9636.m03375	AP004666	Similar to AY088431 ATAF2 protein
9636.m03388	AP005757	lipoate protein ligase-like protein
9636.m03392	AP005159	GDA1/CD39 (nucleoside phosphatase) family, putative
9636.m03425	AP004703	hypothetical protein
9636.m03455	AP004764	retrotransposon protein, putative, Ty1-copia sub-class
9636.m03475	AP004564	receptor-like protein kinase INRPK1
9636.m03484	AP004665	D-3-phosphoglycerate dehydrogenase
9636.m03486	AP004665	sgt1 protein homolog at5g65490
9636.m03504	AP003798	Similar to probable pectinesterase (EC 3.1.1.11) At2g26450 [imported] - Arabidopsis thaliana
9636.m03581	AP004586	RSH-like protein
9636.m03592	AP004707	transposon protein, putative, CACTA, En/Spm sub-class
9636.m03608	AP004707	F-box domain, putative
9636.m03633	AP005405	zinc finger protein, putative
9636.m03745	AP003917	expressed protein
9636.m03761	AP005391	AY065066 AT4g30600/F17I23_60
9636.m03846	AP004620	Similar to probable DNA-binding protein T6L1.19 [imported] - Arabidopsis thaliana
9636.m03921	AP000364	expressed protein
9636.m03934	AP003873	Voltage gated chloride channel, putative
9636.m03950	AP003873	Similar to DNA-binding protein-like - Arabidopsis thaliana
9636.m03953	AP003873	Similar to heat shock protein 82
9636.m03968	AP003892	EF hand, putative
9636.m03978	AP004190	Similar to beta 1,2-xylosyltransferase
9636.m04012	AP005254	Cytochrome P450
9636.m04015	AP005816	Cytochrome P450
9636.m04025	AP005816	Similar to ethylene-insensitive3-like 3 protein
9636.m04153	AP003865	Protein kinase domain, putative
9636.m04328	AP004464	expressed protein
9636.m04339	AP004592	retrotransposon protein, putative, unclassified
9636.m04343	AP004592	ankyrin domain protein
9636.m04348	AP004592	hypothetical protein
9636.m04393	AP004632	probable DNA binding protein PCF2 - rice
9636.m04414	AP004704	expressed protein
9636.m04424	AP006265	Cytochrome P450
9636.m04435	AP003912	Myb-like DNA-binding domain, putative
9636.m04483	AP004044	expressed protein
9636.m04485	AP004044	expressed protein
9636.m04508	AP003928	Similar to peroxisome biogenesis protein PEX1
9637.m01756	AP005872	AL161495 putative protein
9637.m01800	AP005637	trehalose-phosphatase, putative
9637.m01906	AP005692	Cof-like hydrolase, putative
9637.m01954	AP005129	expressed protein
9636.m03389	AP005757	chlorophyll a/b-binding protein presursor
9636.m03434	AP004703	Protein kinase domain, putative
9636.m03534	AP003871	auxin-repressed protein, putative
9636.m03602	AP004707	transposon protein, putative, CACTA, En/Spm sub-class
9636.m03624	AP005405	expressed protein
9636.m03689	AP004693	transposon protein, putative, CACTA, En/Spm sub-class
9636.m03799	AP005918	expressed protein
9636.m03854	AP004620	pollen surface protein, putative
9636.m03903	AP005148	alkaline alpha-galactosidase seed imbibition protein
9636.m03911	AP000364	hypothetical protein
9636.m03937	AP003873	probable wrky transcription factor 2 (wrky dna-binding protein 2)
9636.m03944	AP003873	expressed protein
9636.m04073	AP004765	Spl1-Related2 protein
9636.m04105	AP004708	expressed protein
9636.m04106	AP004708	expressed protein
9636.m04111	AP004708	ribosomal protein S16, putative
9636.m04113	AP004708	TBC domain, putative
9636.m04122	AP004622	retrotransposon protein, putative, Ty1-copia sub-class
9636.m04185	AP003887	signal recognition particle receptor beta subunit-like protein
9636.m04188	AP003887	Endonuclease/Exonuclease/phosphatase family, putative
9636.m04194	AP003888	Helix-loop-helix DNA-binding domain, putative
9636.m04207	AP003888	NAD dependent epimerase/dehydratase family, putative
9636.m04225	AP003857	POT family, putative
9636.m04238	AP004015	FHA domain, putative
9636.m04261	AP005529	Similar to F17L21.15
9636.m04316	AP005439	expressed protein
9636.m04482	AP004044	expressed protein
9636.m04506	AP005480	expressed protein
9636.m04516	AP003928	Low molecular weight phosphotyrosine protein phosphatase, putative
9636.m04593	AP004623	ABC transporter, putative
9636.m04598	AP004623	expressed protein
9636.m04614	AP005411	Similar to AJ006053 peroxisomal membrane protein
9637.m00068	AP005787	receptor protein kinase, putative
9637.m00088	AP005709	expressed protein
9637.m00181	AP005746	SMC6 protein
9637.m02025	AP005421	probable myb factor - rice
9637.m02069	AP005722	UV excision repair protein Rad23
9637.m02098	AP005093	Similar to 36199-34606
9637.m02115	AP005397	Zinc finger, C3HC4 type (RING finger), putative
9637.m02181	AP005429	Methyladenine glycosylase, putative
9637.m02318	AP005833	expressed protein
9636.m03339	AP003881	UV excision repair protein Rad23
9636.m03353	AP003881	expressed protein
9636.m03357	AP003868	transposon protein, putative, CACTA, En/Spm sub-class
9636.m03403	AP005159	Myb-like DNA-binding domain, putative
9636.m03508	AP003798	Phosphatidylinositol-4-phosphate 5-Kinase, putative
9636.m03526	AP003871	Auxin responsive protein, putative
9636.m03559	AP005483	photosystem q(b) protein
9636.m03606	AP004707	cytokinin oxidase
9636.m03617	AP004707	hypothetical protein
9636.m03707	AP004457	alpha-amylase isozyme 3e precursor (ec 3.2.1.1) (1,4-alpha-d-glucan glucanohydrolase). [rice
9636.m03809	AP005918	Zinc finger, C2H2 type, putative
9636.m03813	AP004376	expansin-related protein 2 precursor (ath-expgamma-1.1).
9636.m03877	AP004762	expressed protein
9636.m03943	AP003873	expressed protein
9636.m04009	AP005254	Cytochrome P450
9636.m04023	AP005816	retrotransposon protein, putative, unclassified
9636.m04027	AP005816	lipoxygenase, chloroplast precursor (ec 1.13.11.12).
9636.m04139	AP005509	mitochondrial carrier protein, putative
9636.m04157	AP003865	Zn-finger in Ran binding protein and others, putative
9636.m04196	AP003888	Ras family, putative
9636.m04240	AP004015	proteasome subunit beta type 1 (ec 3.4.25.1) (20s proteasome alphasubunit f) (20s proteasome subunit beta-6)
9636.m04267	AP005529	nuclear transport factor 2 (ntf-2)
9636.m04295	AP005528	transposon protein, putative, CACTA, En/Spm sub-class
9636.m04330	AP004464	glycyl-tRNA synthetase
9636.m04428	AP006265	Zinc finger, C3HC4 type (RING finger), putative
9636.m04437	AP003912	Similar to AL161586 beta-galactosidase-like protein
9636.m04444	AP003912	PCI domain, putative
9636.m04532	AP005524	L1P family of ribosomal proteins
9636.m04570	AP004587	malate dehydrogenase, NADP-dependent
9636.m04571	AP004587	hypothetical protein
9636.m04580	AP004587	expressed protein
9636.m04612	AP005411	expressed protein
9636.m04625	AP004708	expressed protein
9637.m00114	AP005569	Similar to polyadenylate-binding protein - wheat
9637.m00130	AP005789	transposon protein, putative, CACTA, En/Spm sub-class
9637.m00218	AP005725	ABC transporter, putative
9637.m02453	AP005393	protein disulfide-isomerase domain, putative
9637.m02498	AP005655	expressed protein
9637.m02529	AP005318	esterase, putative
9637.m02550	AP005755	carbonate dehydratase, putative
9637.m02579	AP005676	expressed protein
9637.m02632	AP005573	NOL1/NOP2/sun family, putative
9637.m02666	AP006169	Similar to selenium-binding protein
9636.m03337	AP003881	expressed protein
9636.m03376	AP004666	expressed protein
9636.m03378	AP005757	Ribonuclease T2 family
9636.m03400	AP005159	Ribosomal protein L34e
9636.m03472	AP004564	transposon protein, putative, CACTA, En/Spm sub-class
9636.m03488	AP004665	dentin phosphoryn, putative
9636.m03510	AP003798	expressed protein
9636.m03537	AP004662	Similar to NADPH oxidase
9636.m03607	AP004707	hypothetical protein
9636.m03699	AP004457	BT004629 At3g50340
9636.m03755	AP004643	ZF-HD protein dimerisation region, putative
9636.m03797	AP005918	phospho-2-dehydro-3-deoxyheptonate aldolase
9636.m03816	AP004376	metal-transporting P-type ATPase
9636.m03859	AP004620	protein kinase g11a (ec 2.7.1.-) (fragment)
9636.m03890	AP004762	hypothetical protein
9636.m03901	AP005148	BTB/POZ domain, putative
9636.m03904	AP005148	Cytochrome oxidase assembly protein, putative
9636.m03926	AP000364	O-methyltransferase
9636.m03975	AP004190	probable glycerophosphoryl diester phosphodiesterase 2 precursor(ec 3.1.4.46)
9636.m04078	AP004765	SWIM zinc finger, putative
9636.m04108	AP004708	expressed protein
9636.m04166	AP003865	expressed protein
9636.m04229	AP004015	Ubiquitin carboxyl-terminal hydrolase, putative
9636.m04248	AP003920	ribosomal protein L22
9636.m04269	AP005529	expressed protein
9636.m04273	AP005529	coated vesicle membrane protein, putative
9636.m04329	AP004464	Plant protein family, putative
9636.m04394	AP004632	hydroxymethylglutaryl-CoA synthase
9636.m04525	AP003928	Glutathione S-transferase, N-terminal domain, putative
9636.m04607	AP004623	GDSL-like Lipase/Acylhydrolase
9636.m04627	AP003912	Similar to glutathione S-transferase GST 16
9636.m04640	AP003905	Oxysterol-binding protein, putative
9637.m02716	AP005392	WRKY DNA -binding domain, putative
9637.m02719	AP005392	Similar to heat shock protein 82
9637.m02727	AP005677	expressed protein
9637.m02756	AC108756	pirin-like protein at1g50590
9637.m02837	AC099404	transposon protein, putative, mariner sub-class
9637.m02876	AC137595	AY113056 AT3g12300/F28J15_117
9637.m02943	AP005735	expressed protein
9637.m02992	AP005864	F-box domain, putative
9637.m03023	AP005682	6-phosphogluconolactonase
9637.m03045	AP005567	expressed protein
9636.m03344	AP003881	expressed protein
9636.m03365	AP003868	retrotransposon protein, putative, unclassified
9636.m03457	AP004764	Tetraspanin family
9636.m03515	AP003798	expressed protein
9636.m03644	AP006461	transposon protein, putative, CACTA, En/Spm sub-class
9636.m03645	AP006461	retrotransposon protein, putative, Ty1-copia sub-class
9636.m03710	AP004399	retrotransposon protein, putative, unclassified
9636.m03720	AP004399	esterase, putative
9636.m03770	AP005391	expressed protein
9636.m03828	AP004376	ring finger protein
9636.m03848	AP004620	DNA-binding protein Dof2 - maize (fragment)
9636.m03922	AP000364	expressed protein
9636.m03960	AP003892	Protein kinase domain, putative
9636.m03981	AP004190	retrotransposon protein, putative, Ty3-gypsy sub-class
9636.m03984	AP003883	expressed protein
9636.m03987	AP003883	Protein kinase domain
9636.m03997	AP003883	OTU-like cysteine protease, putative
9636.m04030	AP006049	Lipoxygenase, putative
9636.m04032	AP006049	Glycosyl hydrolase family 1
9636.m04058	AP004765	Similar to AT4g38220/F20D10_340
9636.m04076	AP004765	retrotransposon protein, putative, Ty1-copia sub-class
9636.m04098	AP004761	expressed protein
9636.m04102	AP004761	retrotransposon protein, putative, Ty1-copia sub-class
9636.m04107	AP004708	expressed protein
9636.m04136	AP004622	hypothetical protein
9636.m04219	AP003857	Ubiquitin carboxyl-terminal hydrolase, putative
9636.m04228	AP004015	ubiquitin-specific proteinase homolog F24L7.8 - Arabidopsis thaliana
9636.m04272	AP005529	Similar to lipid transfer protein, putative
9636.m04291	AP005528	expressed protein
9636.m04293	AP005528	expressed protein
9636.m04360	AP003948	retrotransposon protein, putative, Ty3-gypsy sub-class
9636.m04427	AP006265	expressed protein
9636.m04430	AP006265	Armadillo/beta-catenin-like repeat, putative
9636.m04481	AP004044	expressed protein
9636.m04544	AP005524	retrotransposon protein, putative, unclassified
9636.m04554	AP005524	polcalcin cyn d 7 (calcium-binding pollen allergen cyn d 7) (calciumbinding protein b1)
9636.m04572	AP004587	Zinc finger, C2H2 type, putative
9636.m04582	AP004587	bet1-like snare 1-1 (atbet11) (bet1/sft1-like snare 14a) (atbs14a)
9636.m04616	AP005411	expressed protein
9637.m03093	AP006067	Similar to peptidylprolyl isomerase (EC 5.2.1.8) M4E13.20 - Arabidopsis thaliana
9637.m03148	AP005882	Transferase family
9637.m03298	AP005090	26s protease regulatory subunit 6b homolog (26s proteasome aaa-atpasesubunit rpt3) (regulatory particle triple-a atpase subunit 3)
9637.m03301	AP005090	dihydroneopterin aldolase, putative
9637.m03317	AP005396	Protein kinase domain, putative
9637.m03323	AP005396	potassium uptake protein
9636.m01668	AP006064	Similar to RIX4
9636.m01901	AP005383	hypothetical protein
9636.m01927	AP005390	peptidyl-prolyl cis-trans isomerase, cyclophilin-type, putative
9636.m02196	AP005407	retrotransposon protein, putative, Ty3-gypsy sub-class
9636.m02245	AP004561	tyrosyl-tRNA synthetase, putative
9636.m02268	AP004661	4-hydroxybenzoate polyprenyl transferase, putative
9636.m02316	AP003884	Glycosyl hydrolases family 17, putative
9636.m02342	AP004759	ENT domain, putative
9636.m02387	AP004256	NB-ARC domain, putative
9636.m02491	AP004553	bifunctional aspartokinase/homoserine dehydrogenase 1, chloroplastprecursor (ak-hd 1) (ak-hsdh 1) [includes: aspartokinase (ec 2.7.2.4);homoserine dehydrogenase (ec 1.1.1.3)]
9636.m02567	AP005512	transposon protein, putative, CACTA, En/Spm sub-class
9636.m02683	AP005628	Similar to CRS1
9636.m02789	AP005389	Actin
9636.m02842	AP004397	Protein kinase domain, putative
9636.m02888	AP005443	expressed protein
9636.m02890	AP005443	oxidoreductase, zinc-binding dehydrogenase family, putative
9636.m02935	AP005795	retrotransposon protein, putative, unclassified
9636.m02939	AP005795	Zinc finger, C3HC4 type (RING finger), putative
9636.m02964	AP005502	NBS-LRR, putative
9636.m03040	AP003880	clathrin assembly protein, putative
9636.m03067	AP003947	expressed protein
9636.m03071	AP003947	transposon protein, putative, CACTA, En/Spm sub-class
9636.m03257	AP005301	Protein kinase domain, putative
9637.m03335	AP006170	135585 cysteine proteinase
9637.m03400	AP005546	Zinc finger, C2H2 type, putative
9637.m03454	AP005393	1-aminocyclopropane-1-carboxylate oxidase 1 (ec 1.-.-.-) (acc oxidase1) (ethylene-forming enzyme) (efe)
9636.m01751	AP004158	transcription factor NtWRKY2
9636.m01787	AP004556	retrotransposon protein, putative, Ty1-copia sub-class
9636.m01823	AP006532	retrotransposon protein, putative, unclassified
9636.m01907	AP004694	flavonoid 7-O-methyltransferase
9636.m01994	AP005843	retrotransposon protein, putative, Ty3-gypsy sub-class
9636.m02109	AP005166	expressed protein
9636.m02317	AP003884	GMP synthase, C-terminal domain, putative
9636.m02385	AP004695	hypothetical protein
9636.m02442	AP004621	hypothetical protein
9636.m02450	AP004574	GTPase activator protein, putative
9636.m02457	AP005491	co-chaperone GrpE, putative
9636.m02511	AP004645	MuDR family transposase, putative
9636.m02513	AP004645	Uncharacterised protein family (UPF0041)
9636.m02646	AP005096	expressed protein
9636.m02752	AP003913	phosphoenolpyruvate carboxylase
9636.m02816	AP004647	NB-ARC domain, putative
9636.m02838	AP004465	retrotransposon protein, putative, unclassified
9636.m02844	AP004397	UDP-glucose 4-epimerase
9636.m02860	AP003962	Protein kinase domain, putative
9636.m02887	AP005443	phospholipid-translocating P-type ATPase, flippase
9636.m02932	AP005795	RBP2 protein
9636.m02940	AP005795	expressed protein
9636.m02998	AP004634	oxidoreductase, 2OG-Fe(II) oxygenase family, putative
9636.m03043	AP003880	expressed protein
9636.m03120	AP003872	Similar to global transcription factor group C 102
9636.m03139	AP004691	BTB/POZ domain, putative
9636.m03142	AP004691	tRNA modification GTPase TrmE
9636.m03163	AP004658	expressed protein
9636.m03256	AP005301	retrotransposon protein, putative, Ty1-copia sub-class
9636.m03261	AP005301	expressed protein
9636.m01687	AP004650	expressed protein
9636.m01693	AP004650	SKP1 interacting partner 1
9636.m01725	AP005163	retrotransposon protein, putative, unclassified
9636.m01728	AP005163	retrotransposon protein, putative, Ty3-gypsy sub-class
9636.m01748	AP004158	hypothetical protein
9636.m01856	AP005541	Similar to ser/thr specific protein kinase-like protein - Arabidopsis thaliana (fragment)
9636.m01931	AP005390	Similar to probable homeobox protein OSH45, splice form OSH45 [similarity] - rice
9636.m01946	AP003918	hypothetical protein
9636.m02039	AP004041	peroxidase 40 precursor (ec 1.11.1.7) (atperox p40).
9636.m02050	AP004041	retrotransposon protein, putative, Ty3-gypsy sub-class
9636.m02120	AP006480	expressed protein
9636.m02221	AP005498	hypothetical protein
9636.m02284	AP005493	expressed protein
9636.m02289	AP004637	expressed protein
9636.m02391	AP004256	Similar to AF466359 SWP1
9636.m02436	AP004621	retrotransposon protein, putative, unclassified
9636.m02490	AP004553	bifunctional aspartokinase/homoserine dehydrogenase 1, chloroplastprecursor (ak-hd 1) (ak-hsdh 1) [includes: aspartokinase (ec 2.7.2.4);homoserine dehydrogenase (ec 1.1.1.3)]
9636.m02649	AP005520	wound inducive gene
9636.m02669	AP005523	F9L1.2 protein - Arabidopsis thaliana
9636.m02670	AP005523	F9L1.2 protein - Arabidopsis thaliana
9636.m02675	AP005523	transposon protein, putative, mariner sub-class
9636.m02769	AP004663	hypothetical protein
9636.m02827	AP004465	expressed protein
9636.m02883	AP005443	Thioredoxin, putative
9636.m02988	AP005502	expressed protein
9636.m02991	AP005502	expressed protein
9638.m00217	AC116601	Leucine Rich Repeat, putative
9638.m00292	AC025098	F-box domain, putative
9636.m01686	AP004650	expressed protein
9636.m01734	AP005163	transposon protein, putative, CACTA, En/Spm sub-class
9636.m01826	AP006532	retrotransposon protein, putative, Ty3-gypsy sub-class
9636.m01923	AP005390	START domain, putative
9636.m01925	AP005390	peptidyl-prolyl cis-trans isomerase, cyclophilin-type, putative
9636.m02178	AY360385	putative reverse transcriptase
9636.m02314	AP003884	transposon protein, putative, mariner sub-class
9636.m02367	AP004652	F-box domain, putative
9636.m02480	AP004553	Similar to ethylene-responsive elongation factor EF-Ts precursor
9636.m02650	AP005520	wound inducive gene
9636.m02885	AP005443	hypothetical protein
9636.m02996	AP004634	Similar to At4g27500/F27G19_100
9636.m02997	AP004634	expressed protein
9636.m03089	AP003904	Similar to AF428444 At1g01240/F6F3_11
9636.m03131	AP004636	transposon protein, putative, CACTA, En/Spm sub-class
9636.m03181	AP005158	plant adhesion molecule, putative
9636.m03182	AP005158	expressed protein
9636.m03190	AP005158	Hypothetical protein
9636.m03265	AP005301	cation efflux family protein, putative
9638.m00253	AC131967	transposon protein, putative, CACTA, En/Spm sub-class
9636.m01881	AP005097	Similar to BT000646 At3g09850/F8A24_10
9636.m01922	AP005390	START domain, putative
9636.m02009	AP005819	retrotransposon protein, putative, Ty3-gypsy sub-class
9636.m02249	AP004561	Similar to 76532-78443
9636.m02291	AP004637	retrotransposon protein, putative, Ty1-copia sub-class
9636.m02315	AP003884	60s ribosomal protein l7a
9636.m02388	AP004256	expressed protein
9636.m02425	AP005866	RNA helicase, putative
9636.m02447	AP004621	Zinc knuckle, putative
9636.m02644	AP005096	expressed protein
9636.m02960	AP004689	expressed protein
9636.m03068	AP003947	expressed protein
9636.m03107	AP005388	hypothetical protein
9636.m03110	AP005388	Heavy-metal-associated domain, putative
9636.m03160	AP004658	trehalose-phosphatase, putative
9636.m03178	AP005158	RNA binding protein
9636.m03247	AP004005	Xanthine/uracil permeases family, putative
9636.m03286	AP005537	methylcrotonyl-coa carboxylase beta chain, mitochondrial precursor(ec 6.4.1.4) (3-methylcrotonyl-coa carboxylase 2) (mccase betasubunit) (3-methylcrotonyl-coa:carbon dioxide ligase beta subunit)
9636.m03288	AP005537	aldehyde dehydrogenase (NAD) family protein, putative
9636.m01724	AP005163	transposon protein, putative, CACTA, En/Spm sub-class
9636.m01752	AP004158	receptor-like protein kinase, putative
9636.m01852	AP005541	expressed protein
9636.m01992	AP005305	retrotransposon protein, putative, Ty1-copia sub-class
9636.m02023	AP005819	hypothetical protein
9636.m02032	AP004041	sucrose-phosphate synthase 1 (ec 2.4.1.14) (udp-glucose-fructose-phosphate glucosyltransferase 1)
9636.m02033	AP004041	sucrose-phosphate synthase 1 (ec 2.4.1.14) (udp-glucose-fructose-phosphate glucosyltransferase 1)
9636.m02112	AP005693	phosphatidylinositol 3-kinase, root isoform (ec 2.7.1.137)(pi3-kinase) (ptdins-3-kinase) (pi3k) (spi3k-5)
9636.m02250	AP004554	indole-3-glycerol phosphate synthase, putative
9636.m02412	AP005496	Protein kinase domain
9636.m02424	AP005866	expressed protein
9636.m02462	AP005491	hypothetical protein
9636.m02775	AP005389	delta-COP
9638.m00282	AC025098	F-box domain, putative
9638.m00290	AC025098	expressed protein
9638.m00293	AC025098	F-box domain, putative
9638.m00299	AC092553	F-box domain, putative
9638.m00301	AC092553	F-box domain, putative
9636.m01800	AP003936	Reticulon, putative
9636.m01952	AP003918	hypothetical protein
9636.m02236	AP004561	retrotransposon protein, putative, unclassified
9636.m02422	AP005496	retrotransposon protein, putative, unclassified
9636.m02854	AP003962	expressed protein
9636.m02895	AP004675	probable polygalacturonase (EC 3.2.1.15) 1 beta chain F17O7.9 - Arabidopsis thaliana
9636.m03072	AP003947	contains similarity to ABC transporter gene_id:MAC9.5
9636.m03130	AP004636	Heavy-metal-associated domain, putative
9636.m03148	AP004691	expressed protein
9636.m03269	AP005301	expressed protein
9636.m03283	AP005537	transposon protein, putative, CACTA, En/Spm sub-class
9638.m00269	AC079128	F-box domain, putative
9638.m00273	AC079128	F-box domain, putative
9638.m00285	AC025098	F-box domain, putative
9636.m01663	AP006064	expressed protein
9636.m01967	AP005487	NB-ARC domain, putative
9636.m01970	AP005305	NB-ARC domain, putative
9636.m02105	AP005166	retrotransposon protein, putative, Ty3-gypsy sub-class
9636.m02283	AP005493	expressed protein
9636.m02285	AP005493	expressed protein
9636.m02651	AP005520	Similar to bZIP transcription factor
9636.m02662	AP005523	retrotransposon protein, putative, unclassified
9636.m02839	AP004465	Ubiquitin-conjugating enzyme, putative
9636.m02967	AP005502	retrotransposon protein, putative, unclassified
9636.m01667	AP006064	expressed protein
9636.m01699	AP005731	expressed protein
9636.m01880	AP005097	Similar to endosomal protein
9636.m02027	AP004458	hAT family dimerisation domain, putative
9636.m02086	AP005162	formamidopyrimidine-DNA glycosylase, putative
9636.m02089	AP005162	cig3
9636.m02111	AP005693	phosphatidylinositol 3-kinase, root isoform (ec 2.7.1.137)(pi3-kinase) (ptdins-3-kinase) (pi3k) (spi3k-5)
9636.m02133	AP006481	ribosomal protein L15, putative
9636.m02375	AP004695	retrotransposon protein, putative, Ty3-gypsy sub-class
9636.m02401	AP005925	transposon protein, putative, CACTA, En/Spm sub-class
9636.m02588	AP004375	transposon protein, putative, CACTA, En/Spm sub-class
9636.m02703	AP005464	retrotransposon protein, putative, unclassified
9636.m02821	AP004465	retrotransposon protein, putative, unclassified
9636.m02977	AP005502	retrotransposon protein, putative, Ty3-gypsy sub-class
9636.m03074	AP003947	hypersensitive-induced response protein
9636.m03075	AP003947	hypersensitive-induced response protein
9636.m03096	AP005388	hypothetical protein
9636.m03336	AP004617	hypothetical protein
9636.m03342	AP003881	GF14-c protein - rice
9636.m03379	AP005757	malate dehydrogenase, NAD-dependent
9636.m03382	AP005757	Similar to probable transfactor F24J1.30 [imported] - Arabidopsis thaliana
9636.m03466	AP004764	Similar to probable RING zinc finger protein [imported] - Arabidopsis thaliana
9636.m03491	AP004665	4-coumarate:coA ligase 2
9636.m03493	AP004558	transposon protein, putative, mariner sub-class
9638.m00167	AC078891	transposon protein, putative, CACTA, En/Spm sub-class
9638.m00192	AC079037	retrotransposon protein, putative, unclassified
9636.m01655	AP006064	expressed protein
9636.m01688	AP004650	expressed protein
9636.m01896	AP005383	expressed protein
9636.m01926	AP005390	peptidyl-prolyl cis-trans isomerase, cyclophilin-type, putative
9636.m02012	AP005819	Adenylate cyclase
9636.m02164	AP005832	transposon protein, putative, ping/pong/SNOOPY sub-class
9636.m02253	AP004554	Fasciclin domain, putative
9636.m02279	AP005493	Rubredoxin, putative
9636.m02281	AP005493	expressed protein
9636.m02312	AP003884	FHA domain, putative
9636.m02512	AP004645	Uncharacterised protein family (UPF0041)
9636.m02589	AP004375	transposon protein, putative, CACTA, En/Spm sub-class
9636.m02667	AP005523	expressed protein
9636.m02773	AP005389	retrotransposon protein, putative, unclassified
9636.m02792	AP005389	expressed protein
9636.m02861	AP003962	Response regulator receiver domain, putative
9636.m02936	AP005795	ABC transporter, putative
9636.m02948	AP004689	Similar to probable Cytochrome B5 F8A5.18 [imported] - Arabidopsis thaliana
9636.m02954	AP004689	expressed protein
9636.m02982	AP005502	retrotransposon protein, putative, unclassified
9636.m03025	AP004193	Protein tyrosine phosphatase-like protein, PTPLA
9638.m00171	AC079037	transposon protein, putative, mariner sub-class
9638.m00187	AC079037	Putative G-protein
9638.m00210	AC079179	retrotransposon protein, putative, Ty1-copia sub-class
9638.m00274	AC079128	Putative bacterial blight resistance protein Xa1-like protein
9636.m02273	AP004661	signal recognition particle protein, putative
9636.m02371	AP004652	retrotransposon protein, putative, Ty3-gypsy sub-class
9636.m02394	AP004256	hypothetical protein
9636.m02633	AP005096	expressed protein
9636.m02857	AP003962	NUDIX domain, putative
9636.m02892	AP004675	transposon protein, putative, CACTA, En/Spm sub-class
9636.m02906	AP005489	transposon protein, putative, CACTA, En/Spm sub-class
9636.m02995	AP004634	Similar to At4g27500/F27G19_100
9636.m03054	AP004137	transposon protein, putative, CACTA, En/Spm sub-class
9636.m03058	AP004137	DC1 domain, putative
9636.m03069	AP003947	ABC transporter protein, putative
9636.m03144	AP004691	expressed protein
9636.m03167	AP004658	expressed protein
9636.m03189	AP005158	retrotransposon protein, putative, Ty1-copia sub-class
9638.m00246	AC074282	Transferase family
9638.m00254	AC131967	transposon protein, putative, CACTA, En/Spm sub-class
9636.m01664	AP006064	Similar to T24D18.18 protein - Arabidopsis thaliana
9636.m01675	AP006064	F-box domain, putative
9636.m01711	AP005731	hypothetical protein
9636.m02014	AP005819	Similar to AY078038 AT5g20410/F5O24_300
9636.m02024	AP004458	C2 domain, putative
9636.m02025	AP004458	Voltage gated chloride channel, putative
9636.m02110	AP005693	hypothetical protein
9636.m02137	AP006481	hypothetical protein
9636.m02282	AP005493	expressed protein
9636.m02309	AP003884	retrotransposon protein, putative, unclassified
9636.m02335	AP004759	Similar to seed maturation protein - soybean
9636.m02372	AP004652	retrotransposon protein, putative, unclassified
9636.m02408	AP005925	transposon protein, putative, CACTA, En/Spm sub-class
9636.m02495	AP004553	Protein kinase domain, putative
9636.m02533	AP004459	expressed protein
9636.m02732	AP005817	hypothetical protein
9636.m02754	AP003913	hypothetical protein
9636.m02802	AP005298	retrotransposon protein, putative, Ty3-gypsy sub-class
9636.m02989	AP005502	expressed protein
9636.m02990	AP005502	expressed protein
9638.m00239	AC074282	UDP-glucoronosyl and UDP-glucosyl transferase
9638.m00264	AC131967	NB-ARC domain, putative
9636.m01676	AP006064	retrotransposon protein, putative, Ty1-copia sub-class
9636.m01790	AP004556	Ser/Thr protein phosphatase, putative
9636.m01814	AP003936	transposon protein, putative, CACTA, En/Spm sub-class
9636.m01828	AP006532	Similar to 00400WD domain, G-beta repeat domains.
9636.m01878	AP005097	adenylate kinase, putative
9636.m01902	AP005383	expressed protein
9636.m02022	AP005819	hypothetical protein
9636.m02149	AP005832	retrotransposon protein, putative, Ty3-gypsy sub-class
9636.m02327	AP004759	hypothetical protein
9636.m02389	AP004256	Similar to struwwelpeter 1 protein
9636.m02454	AP004574	hypothetical protein
9636.m02788	AP005389	F14O10.10 protein - Arabidopsis thaliana
9636.m02889	AP005443	expressed protein
9636.m02945	AP004689	Similar to At1g07350/F22G5_25
9636.m02947	AP004689	WRKY DNA -binding domain, putative
9636.m02958	AP004689	expressed protein
9636.m02959	AP004689	cellulase
9638.m00281	AC025098	F-box domain, putative
9638.m00295	AC025098	retrotransposon protein, putative, unclassified
9636.m01669	AP006064	Similar to RIX4
9636.m01794	AP004556	Formin Homology 2 Domain, putative
9636.m02219	AP005498	hypothetical protein
9636.m02264	AP004661	expressed protein
9636.m02379	AP004695	Leucine Rich Repeat, putative
9636.m02390	AP004256	retrotransposon protein, putative, Ty1-copia sub-class
9636.m02455	AP004574	expressed protein
9636.m02479	AP004553	expressed protein
9636.m02524	AP004459	expressed protein
9636.m02952	AP004689	beta 1,3-glycosyltransferase-like protein I
9636.m02953	AP004689	expressed protein
9638.m00180	AC079037	Ser/Thr protein phosphatase, putative
9638.m00280	AC025098	F-box domain, putative
9636.m01932	AP005390	Similar to probable homeobox protein OSH45, splice form OSH45 [similarity] - rice
9636.m01954	AP003918	threonyl-tRNA synthetase, putative
9636.m02088	AP005162	cig3
9636.m02241	AP004561	retrotransposon protein, putative, Ty3-gypsy sub-class
9636.m02244	AP004561	cyclase, putative
9636.m02246	AP004561	RNA recognition motif. (a.k.a. RRM, RBD, or RNP domain), putative
9636.m02247	AP004561	small oligopeptide transporter, OPT family
9636.m02311	AP003884	FHA domain, putative
9636.m02405	AP005925	retrotransposon protein, putative, Ty3-gypsy sub-class
9636.m02421	AP005496	retrotransposon protein, putative, unclassified
9636.m02444	AP004621	expressed protein
9636.m02526	AP004459	hypothetical protein
9636.m02582	AP004375	hypothetical protein
9636.m02666	AP005523	hypothetical protein
9636.m02672	AP005523	Similar to At1g15070/F9L1_1
9636.m02693	AP005464	hypothetical protein
9636.m02858	AP003962	Leucine Rich Repeat, putative
9636.m02914	AP005795	peptidyl-prolyl cis-trans isomerase, chloroplast precursor (ec 5.2.1.8) (40 kda thylakoid lumen ppiase) (40 kda thylakoid lumen rotamase). [spinach
9636.m02124	AP006480	Rer1 family
9636.m02272	AP004661	signal recognition particle protein, putative
9636.m02339	AP004759	transposon protein, putative, CACTA, En/Spm sub-class
9636.m02340	AP004759	hypothetical protein
9636.m02416	AP005496	galactose-specific isolectin B chain - Erythrina variegata
9636.m02446	AP004621	retrotransposon protein, putative, unclassified
9636.m02482	AP004553	CRAL/TRIO, N-terminus, putative
9636.m02656	AP005523	retrotransposon protein, putative, Ty3-gypsy sub-class
9636.m02787	AP005389	F14O10.10 protein - Arabidopsis thaliana
9636.m02803	AP005298	retrotransposon protein, putative, Ty3-gypsy sub-class
9636.m02850	AP004397	Plant disease resistance response protein
9636.m02962	AP004689	Leucine Rich Repeat, putative
9636.m00307	AP005250	retrotransposon protein, putative, Ty1-copia sub-class
9636.m00331	AP005618	expressed protein
9636.m00346	AP003896	33 kDa secretory protein
9636.m00369	AP003876	Similar to dag protein, chloroplast precursor
9636.m00496	AP005467	expressed protein
9636.m00497	AP005467	Diacylglycerol kinase catalytic domain (presumed), putative
9636.m00509	AP005467	O-methyltransferase, putative
9636.m00545	AP004698	No apical meristem (NAM) protein, putative
9636.m00568	AP004698	transposon protein, putative, CACTA, En/Spm sub-class
9636.m00621	AP005605	retrotransposon protein, putative, Ty1-copia sub-class
9636.m00755	AP003878	expressed protein
9636.m00878	AP005441	Microtubule associated protein 1A/1B, light chain 3, putative
9636.m00987	AP004157	NB-ARC domain, putative
9636.m01214	AP005324	Similar to At4g30200
9636.m01259	AP004751	AA712969 product-related.
9636.m01310	AP005517	transposon protein, putative, CACTA, En/Spm sub-class
9636.m01323	AP004559	expressed protein
9636.m01456	AP004690	retrotransposon protein, putative, unclassified
9636.m01462	AP004690	hypothetical protein
9636.m01477	AP003859	4-coumarate--coa ligase 1 (ec 6.2.1.12) (4cl 1) (4-coumaroyl-coasynthase 1)
9636.m01501	AP005064	Leucine Rich Repeat, putative
9636.m01507	AP005799	ADP-ribosylation factor 3 - Arabidopsis thaliana
9636.m00407	AP004381	expressed protein
9636.m00415	AP005506	EF hand, putative
9636.m00460	AP005740	hypothetical protein
9636.m00485	AP004461	Zinc finger, C3HC4 type (RING finger), putative
9636.m00499	AP005467	expressed protein
9636.m00533	AP004460	probable VAMP-associated protein [imported] - Arabidopsis thaliana
9636.m00677	AP005501	RGH1A
9636.m00686	AP005606	DNA-directed RNA polymerase, beta subunit, putative
9636.m00719	AP005164	Uncharacterised protein family, putative
9636.m00786	AP004692	retrotransposon protein, putative, Ty1-copia sub-class
9636.m00806	AP005440	retrotransposon protein, putative, unclassified
9636.m00861	AP005505	Cupin, putative
9636.m00873	AP005505	expressed protein
9636.m00891	AP005441	Similar to geranyl diphosphat synthase
9636.m00926	AP004746	F-box domain, putative
9636.m00979	AP005442	retrotransposon protein, putative, unclassified
9636.m00983	AP004157	transposon protein, putative, CACTA, En/Spm sub-class
9636.m01021	AP003875	Pectinesterase, putative
9636.m01222	AP003877	transposon protein, putative, CACTA, En/Spm sub-class
9636.m01254	AP003799	hypothetical protein
9636.m01326	AP004559	germin protein type 1 - rice
9636.m01327	AP004559	germin protein type 1 - rice
9636.m01346	AP005603	retrotransposon protein, putative, Ty3-gypsy sub-class
9636.m01411	AP003907	Sulfotransferase domain, putative
9638.m00129	AC079685	POT family
9638.m00140	AC079685	Protein kinase domain, putative
9638.m00198	AC079179	Cytochrome b561
9636.m00284	AP005250	T7N9 14 protein, putative
9636.m00317	AP005618	retrotransposon protein, putative, unclassified
9636.m00376	AP003876	retrotransposon protein, putative, Ty3-gypsy sub-class
9636.m00399	AP005542	retrotransposon protein, putative, Ty3-gypsy sub-class
9636.m00541	AP004460	caffeic acid 3-o-methyltransferase (ec 2.1.1.68) (s-adenosysl-l-methionine:caffeic acid 3-o-methyltransferase) (comt) (caomt)
9636.m00581	AP005504	DnaJ domain, putative
9636.m00582	AP005504	ribosomal protein L13, putative
9636.m00598	AP005847	Sigma-70 region 2, putative
9636.m00607	AP005847	expressed protein
9636.m00636	AP005605	Similar to ABC transporter, putative
9636.m00664	AP004560	expressed protein
9636.m00670	AP005501	Similar to Mla1
9636.m00782	AP004692	transposon protein, putative, CACTA, En/Spm sub-class
9636.m00874	AP005505	Auxin Efflux Carrier
9636.m00960	AP004589	Fatty acid desaturase
9636.m01011	AP004565	gamma-aminobutyrate transaminase subunit precursor isozyme 3
9636.m01108	AP005488	transposon protein, putative, CACTA, En/Spm sub-class
9636.m01374	AP004705	expressed protein
9636.m01452	AP004690	retrotransposon protein, putative, Ty3-gypsy sub-class
9636.m01488	AP005064	Similar to AL161581 ubiquinol-cytochrome c reductase-like protein
9636.m01506	AP005799	aspartate carbamoyltransferase
9636.m01615	AP005095	transposon protein, putative, CACTA, En/Spm sub-class
9636.m03340	AP003881	RNA recognition motif. (a.k.a. RRM, RBD, or RNP domain), putative
9636.m03343	AP003881	GF14-c protein - rice
9636.m03349	AP003881	Agenet domain, putative
9636.m03383	AP005757	transposon protein, putative, CACTA, En/Spm sub-class
9636.m03416	AP005159	hypothetical protein
9636.m03431	AP004703	glyceraldehyde-3-phosphate dehydrogenase
9636.m03441	AP004703	retrotransposon protein, putative, unclassified
9636.m03470	AP004564	trehalose-6-phosphate synthase homolog F17O7.18 - Arabidopsis thaliana
9636.m03490	AP004665	adenylyl cyclase associated protein
9638.m00182	AC079037	expressed protein
9638.m00190	AC079037	O-methyltransferase, putative
9636.m00365	AP003876	serine/threonine-specific protein kinase-like protein
9636.m00387	AP003911	membrane associated protein, putative
9636.m00411	AP004381	transposon protein, putative, CACTA, En/Spm sub-class
9636.m00498	AP005467	expressed protein
9636.m00538	AP004460	Similar to At1g79730/F19K16_29
9636.m00547	AP004698	No apical meristem (NAM) protein, putative
9636.m00561	AP004698	zinc finger domain, LSD1 subclass, putative
9636.m00583	AP005504	expressed protein
9636.m00681	AP005501	expressed protein
9636.m00714	AP005164	Transferase family
9636.m00872	AP005505	hypothetical protein
9636.m00879	AP005441	lactoylglutathione lyase, putative
9636.m00881	AP005441	hypothetical protein
9636.m00896	AP005441	nodulin, putative
9636.m00906	AP004746	transposon protein, putative, mariner sub-class
9636.m00923	AP004746	CCAAT-binding transcription factor subunit, putative
9636.m00927	AP004746	F-box domain, putative
9636.m00930	AP004746	F-box domain, putative
9636.m01315	AP005410	retrotransposon protein, putative, Ty1-copia sub-class
9636.m01530	AP005161	Similar to photosystem ii p680 chlorophyll a apoprotein (cp-47 protein). [rye
9638.m00104	AC068654	transposon protein, putative, CACTA, En/Spm sub-class
9638.m00134	AC079685	expressed protein
9638.m00199	AC079179	Putative DNA2-NAM7 helicase family protein
9636.m00339	AP003896	expressed protein
9636.m00362	AP003876	Helix-loop-helix DNA-binding domain, putative
9636.m00367	AP003876	RNA recognition motif. (a.k.a. RRM, RBD, or RNP domain), putative
9636.m00368	AP003876	Similar to dag protein, chloroplast precursor
9636.m00404	AP005542	contains similarity to amine oxidase gene_id:MMM17.10
9636.m00537	AP004460	mitogen-activated protein kinase MMK2 (EC 2.7.1.-) - alfalfa
9636.m00641	AP004560	expressed protein
9636.m00945	AP005416	hypothetical protein
9636.m00993	AP003858	Protein kinase domain, putative
9636.m01210	AP005324	retrotransposon protein, putative, Ty3-gypsy sub-class
9636.m01262	AP004751	Similar to AY125519 At2g22230/T26C19.11
9636.m01633	AP005697	probable cytochrome P450 [imported] - Arabidopsis thaliana
9636.m03057	AP004137	DC1 domain, putative
9636.m03151	AP004691	retrotransposon protein, putative, Ty3-gypsy sub-class
9636.m03241	AP005521	expressed protein
9638.m00130	AC079685	POT family
9638.m00181	AC079037	expressed protein
9638.m00283	AC025098	F-box domain, putative
9636.m00285	AP005250	T7N9 14 protein, putative
9636.m00337	AP003896	RNA polymerase II complex component SRB7 protein, putative
9636.m00343	AP003896	33-kDa secretory protein
9636.m00383	AP003911	expressed protein
9636.m00413	AP005506	transposon protein, putative, CACTA, En/Spm sub-class
9636.m00456	AP005741	AL161546 inositol 2-dehydrogenase like protein
9636.m00477	AP004461	F-box domain, putative
9636.m00493	AP005467	Cytochrome P450
9636.m00519	AP003905	Brix domain, putative
9636.m00542	AP004460	Similar to LHY protein
9636.m00645	AP004560	Terpene synthase family, metal binding domain, putative
9636.m00713	AP005164	Transferase family
9636.m00754	AP003878	expressed protein
9636.m00759	AP003878	B-box zinc finger, putative
9636.m00837	AP004656	glucose-6-phosphate/phosphate translocator
9636.m00899	AP005441	N7 like-protein [imported] - Arabidopsis thaliana
9636.m00905	AP004746	retrotransposon protein, putative, Ty1-copia sub-class
9636.m00953	AP005416	Fatty acid desaturase
9636.m00961	AP004589	photosystem II 10K protein - rice
9636.m01057	AP004649	retrotransposon protein, putative, unclassified
9636.m01109	AP005488	transposon protein, putative, CACTA, En/Spm sub-class
9636.m01197	AP005870	transposon protein, putative, CACTA, En/Spm sub-class
9636.m01268	AP004751	expressed protein
9636.m01378	AP004705	end-xyloglucan transferase (EC 2.4.1.-) - rice
9636.m01415	AP004657	Similar to At2g41350/F13H10.10
9636.m01434	AP004657	plasma-membrane proton-efflux P-type ATPase
9636.m01509	AP005799	probable protein kinase [imported] - Arabidopsis thaliana
9636.m03082	AP003904	Similar to contains similarity to SET-domain protein gene_id:MQL5.1
9636.m03099	AP005388	GMC oxidoreductase, putative
9636.m03168	AP004658	Similar to probable transporter, 34935-36578 [imported] - Arabidopsis thaliana
9636.m03172	AP004658	expressed protein
9636.m03188	AP005158	Hypothetical protein
9636.m00280	AP004591	AMP-binding enzyme, putative
9636.m00414	AP005506	transposon protein, putative, CACTA, En/Spm sub-class
9636.m00474	AP004461	transposon protein, putative, mariner sub-class
9636.m00486	AP004461	monodehydroascorbate reductase
9636.m00535	AP004460	Ribosomal protein L34e
9636.m00557	AP004698	Myb-like DNA-binding domain, putative
9636.m00616	AP005605	retrotransposon protein, putative, unclassified
9636.m00730	AP003882	Similar to somatic embryogenesis receptor kinase 1
9636.m00770	AP004692	mRNA capping enzyme, large subunit
9636.m00866	AP005505	NB-ARC domain, putative
9636.m00871	AP005505	retrotransposon protein, putative, unclassified
9636.m00876	AP005505	phosphoribosylamine--glycine ligase
9636.m00937	AP005416	hypothetical protein
9636.m01328	AP004559	germin protein type 1 - rice
9636.m01389	AP003907	AT3g23600/MDB19_9
9636.m01397	AP003907	Complex 1 protein (LYR family), putative
9636.m01430	AP004657	possible apospory-associated protein c
9636.m01431	AP004657	retrotransposon protein, putative, Ty1-copia sub-class
9636.m01457	AP004690	NADPH-cytochrome P450 reductase
9636.m01464	AP004690	Similar to At4g30240/F9N11_90
9636.m01508	AP005799	Similar to CONSTANS-like protein CO8
9636.m03076	AP003947	hypersensitive-induced response protein
9636.m03119	AP003872	ribosomal protein L27, putative
9636.m03213	AP004667	probable oxidoreductase, 38288-39393 [imported] - Arabidopsis thaliana, putative
9638.m00142	AC079685	oxidoreductase, aldo/keto reductase family
9636.m00303	AP005250	hypothetical protein
9636.m00336	AP005620	beta-1,3-glucanase C terminal fragment, putative
9636.m00350	AP003896	Actin
9636.m00371	AP003876	flavodoxin, putative
9636.m00406	AP004381	lipase-like protein
9636.m00410	AP004381	Similar to contains similarity to Myb-related transcription activator gene_id:MIK19.31
9636.m00463	AP005740	F-box domain, putative
9636.m00520	AP003905	proline-rich protein, putative
9636.m00595	AP005847	Nuf2 family, putative
9636.m00618	AP005605	transposon protein, putative, mariner sub-class
9636.m00669	AP005501	Similar to Mla1
9636.m00688	AP005606	expressed protein
9636.m00723	AP005164	expressed protein
9636.m00745	AP004619	hypothetical protein
9636.m00807	AP005440	retrotransposon protein, putative, Ty3-gypsy sub-class
9636.m00835	AP004656	Roc1
9636.m00840	AP004656	retrotransposon protein, putative, Ty1-copia sub-class
9636.m00859	AP005505	germin-like protein 6 - rice
9636.m00928	AP004746	expressed protein
9636.m00947	AP005416	F-box domain, putative
9636.m00952	AP005416	GTP-binding protein
9636.m01005	AP004565	Nucleoside transporter, putative
9636.m01020	AP003875	expressed protein
9636.m01260	AP004751	phosphoethanolamine cytidylyltransferase
9636.m01288	AP004183	BTB/POZ domain, putative
9636.m01309	AP005517	hypothetical protein
9636.m01317	AP005410	Similar to AY087885 F-box protein ZEITLUPE/FKF/LKP/ADAGIO family
9636.m01443	AP005249	hypothetical protein
9636.m01482	AP003859	NB-ARC domain, putative
9636.m01513	AP005799	hypothetical protein
9636.m01550	AP004013	preprotein translocase secy subunit, chloroplast precursor (cpsecy)
9638.m00070	AC037197	Transferase family
9636.m00287	AP005250	nonspecific lipid-transfer protein a (ns-ltp a) (phospholipid transferprotein) (pltp)
9636.m00405	AP005542	Similar to probable glycosylation enzyme [imported] - Arabidopsis thaliana
9636.m00431	AP005506	hypothetical protein
9636.m00443	AP005741	retrotransposon protein, putative, Ty1-copia sub-class
9636.m00550	AP004698	FAD binding domain, putative
9636.m00556	AP004698	expressed protein
9636.m00577	AP005504	expressed protein
9636.m00599	AP005847	Sigma-70 region 2, putative
9636.m00665	AP004560	HAD-superfamily hydrolase, subfamily IA, variant 1, putative
9636.m00694	AP005606	UvrB/uvrC motif, putative
9636.m00740	AP004619	F23A5.2(form2) [imported] - Arabidopsis thaliana
9636.m00749	AP004619	probable snRNP splicing factor [imported] - Arabidopsis thaliana
9636.m00774	AP004692	transposon protein, putative, Ac/Ds sub-class
9636.m00850	AP005531	transposon protein, putative, CACTA, En/Spm sub-class
9636.m00946	AP005416	F-box domain, putative
9636.m00990	AP004157	Protein kinase domain, putative
9636.m01003	AP004565	NB-ARC domain, putative
9636.m01196	AP005870	transposon protein, putative, CACTA, En/Spm sub-class
9636.m01353	AP005603	60S ribosomal protein L7
9636.m03156	AP004691	AP2 domain, putative
9636.m03207	AP004667	transposon protein, putative, CACTA, En/Spm sub-class
9636.m03275	AP005301	Eukaryotic-type carbonic anhydrase
9636.m00347	AP003896	33 kDa secretory protein
9636.m00440	AP005741	retrotransposon protein, putative, Ty3-gypsy sub-class
9636.m00492	AP005467	Cytochrome P450
9636.m00495	AP005467	expressed protein
9636.m00512	AP005467	Multicopper oxidase, putative
9636.m00523	AP003905	retrotransposon protein, putative, unclassified
9636.m00553	AP004698	SPFH domain / Band 7 family, putative
9636.m00558	AP004698	Tetraspanin family, putative
9636.m00570	AP004635	myb-like DNA-binding domain, SHAQKYF class, putative
9636.m00601	AP005847	expressed protein
9636.m00769	AP004692	AT5g54540/MRB17_4
9636.m00852	AP005505	probable germin protein type 2 - rice
9636.m00924	AP004746	F-box domain, putative
9636.m00948	AP005416	F-box domain, putative
9636.m00991	AP004157	Protein kinase domain, putative
9636.m01004	AP004565	NB-ARC domain, putative
9636.m01235	AP003877	hAT family dimerisation domain, putative
9636.m01287	AP004183	BTB/POZ domain, putative
9636.m01352	AP005603	expressed protein
9636.m01379	AP004705	Nucleotidyl transferase, putative
9636.m01444	AP005249	Sigma-70 region 2, putative
9636.m03070	AP003947	transposon protein, putative, CACTA, En/Spm sub-class
9636.m03210	AP004667	Similar to At5g23040/MYJ24_3
9636.m03264	AP005301	expressed protein
9638.m00143	AC079685	oxidoreductase, aldo/keto reductase family
9638.m00194	AC079037	O-methyltransferase, putative
9636.m00319	AP005618	hypothetical protein
9636.m00334	AP005620	hypothetical protein
9636.m00340	AP003896	tryptophan synthase, beta subunit
9636.m00349	AP003896	Similar to fertilization-independent endosperm protein
9636.m00370	AP003876	Similar to dag protein, chloroplast precursor
9636.m00418	AP005506	expressed protein
9636.m00470	AP005740	transposon protein, putative, CACTA, En/Spm sub-class
9636.m00487	AP004461	monodehydroascorbate reductase
9636.m00572	AP004635	Cellulose synthase
9636.m00643	AP004560	Terpene synthase family, metal binding domain, putative
9636.m00725	AP005164	PolI-like DNA polymerase
9636.m00753	AP003878	Sugar transporter
9636.m00756	AP003878	expressed protein
9636.m00875	AP005505	aconitate hydratase 1
9636.m00889	AP005441	similar to
9636.m00929	AP004746	F-box domain, putative
9636.m00943	AP005416	retrotransposon protein, putative, unclassified
9636.m01007	AP004565	SET-domain transcriptional regulator protein, putative
9636.m01017	AP003875	bifunctional purine biosynthesis protein PurH
9636.m01019	AP003875	CG15040-PA
9636.m01022	AP003875	ribosomal protein S17, putative
9636.m01039	AP004135	transposon protein, putative, CACTA, En/Spm sub-class
9636.m01343	AP005603	retrotransposon protein, putative, Ty1-copia sub-class
9636.m01377	AP004705	end-xyloglucan transferase (EC 2.4.1.-) - rice
9636.m01381	AP004705	Nucleotidyl transferase, putative
9636.m01445	AP005478	expressed protein
9636.m01466	AP004690	hypothetical protein
9636.m01546	AP004013	glucosyltransferase, putative
9636.m01576	AP005157	expressed protein
9638.m00126	AC079685	Putative peptide/amino acid transporter
9638.m00162	AC078891	expressed protein
9638.m00183	AC079037	Glycosyl hydrolases family 16, putative
9638.m00202	AC079179	retrotransposon protein, putative, Ty1-copia sub-class
9638.m00229	AC116601	hypothetical protein
9636.m00272	AP004591	hypothetical protein
9636.m00286	AP005250	cytochrome P450 protein
9636.m00300	AP005250	retrotransposon protein, putative, Ty1-copia sub-class
9636.m00345	AP003896	33-kDa secretory protein
9636.m00352	AP003896	Similar to AT4g23490/F16G20_190
9636.m00372	AP003876	expressed protein
9636.m00381	AP003911	aromatic-l-amino-acid decarboxylase (ec 4.1.1.28) (aadc) (dopadecarboxylase) (tryptophan decarboxylase)
9636.m00514	AP003940	Transaldolase, putative
9636.m00536	AP004460	probable topoisomerase VIA [imported] - Arabidopsis thaliana
9636.m00584	AP005504	expressed protein
9636.m00624	AP005605	Similar to At3g52390
9636.m00692	AP005606	UvrB/uvrC motif, putative
9636.m00760	AP003878	B-box zinc finger, putative
9636.m00848	AP005531	transposon protein, putative, CACTA, En/Spm sub-class
9636.m00856	AP005505	germin-like protein 6 - rice
9636.m00957	AP004589	hypothetical protein
9636.m00986	AP004157	retrotransposon protein, putative, unclassified
9636.m01018	AP003875	bifunctional purine biosynthesis protein PurH
9636.m01199	AP005870	retrotransposon protein, putative, Ty3-gypsy sub-class
9636.m01244	AP003799	zinc finger domain, LSD1 subclass, putative
9636.m01265	AP004751	transposon protein, putative, CACTA, En/Spm sub-class
9636.m01468	AP003859	transposon protein, putative, CACTA, En/Spm sub-class
9636.m01529	AP005161	DNA-directed RNA polymerase, alpha subunit, putative
9636.m01593	AP005123	retrotransposon protein, putative, Ty1-copia sub-class
9636.m01612	AP005095	senescence-associated protein 5
9638.m00115	AC068654	retrotransposon protein, putative, Ty1-copia sub-class
9636.m00375	AP003876	Terpene synthase family, metal binding domain, putative
9636.m00412	AP004381	transposon protein, putative, CACTA, En/Spm sub-class
9636.m00488	AP004461	monodehydroascorbate reductase
9636.m00494	AP005467	expressed protein
9636.m00525	AP003905	dna-directed rna polymerase ii largest subunit (ec 2.7.7.6). [mouse-ear cress
9636.m00544	AP004698	expressed protein
9636.m00566	AP004698	Zinc finger C-x8-C-x5-C-x3-H type (and similar), putative
9636.m00578	AP005504	expressed protein
9636.m00673	AP005501	transposon protein, putative, CACTA, En/Spm sub-class
9636.m00693	AP005606	UvrB/uvrC motif, putative
9636.m00695	AP005606	UvrB/uvrC motif, putative
9636.m00771	AP004692	SET domain, putative
9636.m00781	AP004692	transposon protein, putative, CACTA, En/Spm sub-class
9636.m00863	AP005505	Cupin, putative
9636.m00884	AP005441	Similar to AT4g33690/T16L1_180
9636.m00944	AP005416	transposon protein, putative, Ac/Ds sub-class
9636.m00965	AP004589	retrotransposon protein, putative, Ty3-gypsy sub-class
9636.m00967	AP004589	Similar to NAC domain protein NAC1
9636.m00995	AP003858	GONST4 Golgi Nucleotide sugar transporter
9636.m01015	AP003875	potassium uptake protein
9636.m01016	AP003875	Similar to Transcription factor
9636.m01263	AP004751	hypothetical protein
9636.m01341	AP004559	Exo70 exocyst complex subunit
9636.m01448	AP005478	AT3g11470/F24K9_14
9636.m01490	AP005064	hypothetical protein
9636.m01496	AP005064	Leucine Rich Repeat, putative
9636.m03206	AP004667	DEAD/DEAH box helicase, putative
9638.m00022	AC108883	retrotransposon protein, putative, Ty3-gypsy sub-class
9638.m00068	AC069324	Pyridoxal-dependent decarboxylase conserved domain, putative
9636.m00482	AP004461	Sm protein, putative
9636.m00484	AP004461	expressed protein
9636.m00515	AP003940	Eukaryotic DNA topoisomerase I, DNA binding fragment, putative
9636.m00522	AP003905	nitrate transporter
9636.m00532	AP004460	major facilitator superfamily protein
9636.m00580	AP005504	Cytidylyltransferase
9636.m00629	AP005605	FAR1 family, putative
9636.m00663	AP004560	expressed protein
9636.m00678	AP005501	Cullin family
9636.m00698	AP005164	retrotransposon protein, putative, Ty3-gypsy sub-class
9636.m00718	AP005164	NB-ARC domain, putative
9636.m00758	AP003878	Diacylglycerol kinase catalytic domain (presumed), putative
9636.m00761	AP003878	B-box zinc finger, putative
9636.m00772	AP004692	DNA-binding protein, putative
9636.m00824	AP004568	Similar to polyubiquitin
9636.m00836	AP004656	PCF11 protein, putative
9636.m01380	AP004705	Nucleotidyl transferase, putative
9636.m01400	AP003907	hypothetical protein
9636.m01408	AP003907	retrotransposon protein, putative, Ty1-copia sub-class
9636.m01429	AP004657	possible apospory-associated protein c
9636.m01439	AP005249	expressed protein
9636.m01564	AP005157	hypothetical protein
9638.m00139	AC079685	Endomembrane protein 70
9638.m00152	AC098694	oxidoreductase, aldo/keto reductase family
9638.m00153	AC098694	oxidoreductase, aldo/keto reductase family
9636.m00283	AP005250	transposon protein, putative, mariner sub-class
9636.m00379	AP003911	aromatic-l-amino-acid decarboxylase (ec 4.1.1.28) (aadc) (dopadecarboxylase) (tryptophan decarboxylase)
9636.m00457	AP005740	receptor-like protein kinase 1
9636.m00481	AP004461	Myb-like DNA-binding domain, putative
9636.m00540	AP004460	Zinc finger, C3HC4 type (RING finger), putative
9636.m00682	AP005501	hypothetical protein
9636.m00717	AP005164	Similar to probable somatic embryogenesis receptor-like kinase - carrot
9636.m00764	AP004590	Similar to S-locus receptor-like kinase RLK14
9636.m00809	AP005440	hypothetical protein
9636.m00853	AP005505	germin protein type 1 - rice
9636.m00888	AP005441	Similar to viroid RNA-binding protein
9636.m00925	AP004746	F-box domain, putative
9636.m00971	AP004589	retrotransposon protein, putative, Ty1-copia sub-class
9636.m00972	AP004589	expressed protein
9636.m01001	AP004565	expressed protein
9636.m01027	AP003919	Similar to ERG protein
9636.m01126	AP005754	transposon protein, putative, CACTA, En/Spm sub-class
9636.m01387	AP004705	retrotransposon protein, putative, unclassified
9636.m01505	AP005495	Similar to P-type R2R3 Myb protein
9636.m01527	AP005161	Similar to HSP101-like protein
9636.m01577	AP005157	expressed protein
9636.m01611	AP005095	senescence-associated protein 5
9636.m01628	AP005095	hypothetical protein
9636.m03053	AP004137	transposon protein, putative, CACTA, En/Spm sub-class
9636.m03078	AP003947	AL161582 aminopeptidase-like protein
9636.m03087	AP003904	similar to mammalian MHC III region protein G9a [imported] - Arabidopsis thaliana
9636.m03137	AP004691	high affinity sulfate transporter
9636.m03138	AP004691	BTB/POZ domain, putative
9636.m03153	AP004691	expressed protein
9636.m03183	AP005158	F13B4.1 protein - Arabidopsis thaliana, putative
9636.m03205	AP004667	Homeobox associated leucine zipper, putative
9636.m00290	AP005250	transposon protein, putative, CACTA, En/Spm sub-class
9636.m00323	AP005618	retrotransposon protein, putative, Ty1-copia sub-class
9636.m00335	AP005620	Zinc finger, C3HC4 type (RING finger), putative
9636.m00353	AP003896	stellacyanin
9636.m00471	AP005740	transposon protein, putative, CACTA, En/Spm sub-class
9636.m00546	AP004698	No apical meristem (NAM) protein, putative
9636.m00564	AP004698	retrotransposon protein, putative, Ty3-gypsy sub-class
9636.m00724	AP005164	PolI-like DNA polymerase
9636.m00741	AP004619	F23A5.2(form2) [imported] - Arabidopsis thaliana
9636.m00742	AP004619	Similar to TGA-type basic leucine zipper protein TGA1.1
9636.m00851	AP005531	germin-like protein 16 - rice
9636.m00936	AP005416	hypothetical protein
9636.m01008	AP004565	copper chaperone
9636.m01180	AP005933	retrotransposon protein, putative, unclassified
9636.m01212	AP005324	AT3g14310/MLN21_9
9636.m01249	AP003799	Similar to oxidosqualene cyclase
9636.m01478	AP003859	Similar to adenosylmethionine-8-amino-7-oxononanoate aminotransferase-like protein
9636.m01503	AP005064	retrotransposon protein, putative, Ty1-copia sub-class
9636.m01551	AP004013	Similar to BT002284 At4g30360/F17I23_300
9637.m03425	AP006162	retrotransposon protein, putative, unclassified
9637.m03431	AP006162	Similar to blue copper-binding protein homolog
9638.m00102	AC068654	transposon protein, putative, CACTA, En/Spm sub-class
9638.m00155	AC098694	expressed protein
9635.m03805	AP003981	Protein kinase domain, putative
9635.m03820	AP005908	expressed protein
9635.m03828	AP005908	AL161533 copper amine oxidase like protein
9635.m03833	AP003845	GDP-fucose protein-O-fucosyltransferase 2
9635.m03973	AP005437	expressed protein
9635.m04097	AP003840	retrotransposon protein, putative, unclassified
9635.m04108	AP005807	hypothetical protein
9635.m04228	AP005198	expressed protein
9635.m04247	AP005198	expressed protein
9635.m04285	AP004309	Protein kinase domain, putative
9635.m04289	AP004309	DnaJ domain, putative
9635.m04318	AP004341	expressed protein
9635.m04343	AP004009	SAP domain, putative
9635.m04348	AP004009	amine oxidase, flavin-containing, putative
9635.m04351	AP004009	SWIM zinc finger, putative
9635.m04416	AP004339	expressed protein
9635.m04453	AP003749	expressed protein
9635.m04515	AP003765	expressed protein
9635.m04588	AP006459	retrotransposon protein, putative, Ty3-gypsy sub-class
9635.m04659	AP005184	expressed protein
9635.m04710	AP003825	Similar to 4-alpha-glucanotransferase
9635.m04761	AP004570	expressed protein
9635.m04771	AP004570	hypothetical protein
9635.m04880	AP005099	Glycosyl transferase family 8, putative
9635.m04905	AP005167	hypothetical protein
9635.m05015	AP004309	Adaptor complexes medium subunit family
9636.m00013	AP005406	hypothetical protein
9636.m00033	AP004654	Similar to NAM (no apical meristem)-like protein
9636.m00040	AP003909	expressed protein
9636.m00133	AP004562	hypothetical protein
9636.m00136	AP004562	3' exoribonuclease family, domain 1, putative
9636.m00140	AP004562	ribosomal protein S15, putative
9636.m00145	AP004562	probable Na/H antiporter [imported] - Arabidopsis thaliana, putative
9636.m00149	AP004562	Similar to At4g12080/F16J13_150
9636.m00239	AP003886	glyceraldehyde-3-phosphate dehydrogenase, type I
9636.m03141	AP004691	hypothetical protein
9636.m03214	AP004667	oxidoreductase homolog T4I9.5 - Arabidopsis thaliana, putative
9636.m03285	AP005537	methylcrotonyl-coa carboxylase beta chain, mitochondrial precursor(ec 6.4.1.4) (3-methylcrotonyl-coa carboxylase 2) (mccase betasubunit) (3-methylcrotonyl-coa:carbon dioxide ligase beta subunit)
9635.m03914	AP004276	Polyprenyl synthetase, putative
9635.m03962	AP003803	amino-acid N-acetyltransferase
9635.m03989	AP005149	Zinc finger, C2H2 type, putative
9635.m04026	AP003846	hypothetical protein
9635.m04105	AP004230	hypothetical protein
9635.m04138	AP005175	reversibly glycosylated polypeptide
9635.m04219	AP003700	hydrolase, alpha/beta fold family, putative
9635.m04221	AP003700	Region found in RelA / SpoT proteins, putative
9635.m04222	AP003700	ribosomal protein L15, putative
9635.m04236	AP005198	translation elongation factor eEF-1 beta - rice
9635.m04239	AP005198	SPX domain, putative
9635.m04256	AP004988	Sucrose synthase, putative
9635.m04273	AP004309	EF hand, putative
9635.m04280	AP004309	retrotransposon protein, putative, Ty1-copia sub-class
9635.m04370	AP004306	Myb-like DNA-binding domain, putative
9635.m04408	AP004339	expressed protein
9635.m04413	AP004339	DEAD/DEAH box helicase, putative
9635.m04432	AP003752	Cytochrome P450
9635.m04437	AP003749	TruB family pseudouridylate synthase (N terminal domain), putative
9635.m04439	AP003749	Helicase conserved C-terminal domain, putative
9635.m04482	AP005292	eIF-6 family
9635.m04483	AP005292	eIF-6 family
9635.m04517	AP003832	hypothetical protein
9635.m04563	AP004272	hypothetical protein
9635.m04579	AP004272	hypothetical protein
9635.m04598	AP006459	expressed protein
9635.m04625	AP006460	transposon protein, putative, mariner sub-class
9635.m04664	AP003833	thioredoxin reductase, putative
9635.m04669	AP003833	ferredoxin-dependent glutamate synthase (fragments)
9635.m04674	AP003833	expressed protein
9635.m04681	AP003833	Glutaredoxin, putative
9635.m04696	AP004378	hypothetical protein
9635.m04705	AP005452	EF-1 guanine nucleotide exchange domain, putative
9635.m04803	AP004300	Kelch motif, putative
9635.m04816	AP004343	Eukaryotic ribosomal protein L18
9635.m04955	AP004316	DnaJ domain, putative
9635.m04965	AP004316	Pectinesterase, putative
9635.m05008	AP005199	expressed protein
9636.m00024	AP004654	expressed protein
9636.m00027	AP004654	hypothetical protein
9636.m00075	AP004584	alcohol dehydrogenase-like protein
9636.m00106	AP004566	SRF-type transcription factor (DNA-binding and dimerisation domain), putative
9636.m00130	AP004562	No apical meristem (NAM) protein, putative
9636.m00166	AP003925	succinate dehydrogenase and fumarate reductase iron-sulfur protein
9637.m03433	AP006162	Dynamin central region, putative
9637.m03435	AP005321	ABC transporter protein, putative
9635.m03846	AP003845	Similar to root border cell-specific protein
9635.m03908	AP004276	expressed protein
9635.m03937	AP003747	WRKY DNA -binding domain, putative
9635.m03955	AP003803	C2 domain, putative
9635.m04022	AP003846	expressed protein
9635.m04051	AP004275	Protein kinase domain, putative
9635.m04054	AP004275	WRKY DNA -binding domain, putative
9635.m04066	AP003915	expressed protein
9635.m04070	AP003915	Similar to gene_id:MXM12.5
9635.m04071	AP003915	Glycosyl hydrolase family 79, N-terminal domain, putative
9635.m04113	AP005807	Similar to 162587 RNA-binding glycine rich protein
9635.m04121	AP005807	expressed protein
9635.m04134	AP005175	Similar to probable phytochelatin synthetase [imported] - Arabidopsis thaliana
9635.m04178	AP005895	ribosomal protein S3
9635.m04179	AP005895	ribosomal protein S3
9635.m04195	AP005895	expressed protein
9635.m04223	AP003700	Exportin-t, putative
9635.m04231	AP005198	Strictosidine synthase
9635.m04284	AP004309	hypothetical protein
9635.m04317	AP004341	expressed protein
9635.m04379	AP004260	Ribonuclease T2 family
9635.m04404	AP004339	Protein kinase domain, putative
9635.m04493	AP004671	retrotransposon protein, putative, unclassified
9635.m04499	AP004671	GDSL-like Lipase/Acylhydrolase
9635.m04558	AP003822	DEAD/DEAH box helicase, putative
9635.m04593	AP006459	retrotransposon protein, putative, unclassified
9635.m04639	AP005182	hypothetical protein
9635.m04650	AP005184	Glycosyl hydrolase family 1
9635.m04688	AP004378	Adenosine/AMP deaminase
9635.m04772	AP004570	hypothetical protein
9635.m04827	AP004343	tRNA synthetases class I (W and Y), putative
9635.m04874	AP005099	plant acid phosphatase
9635.m04900	AP005167	expressed protein
9635.m05026	AP005188	transposon protein, putative, CACTA, En/Spm sub-class
9636.m00009	AP005406	B3 DNA binding domain, putative
9636.m00012	AP005406	sulfate transporter, putative
9636.m00063	AP004462	hypothetical protein
9636.m00067	AP004462	AT5g64630/MUB3_15
9636.m00114	AP004566	U-box domain, putative
9636.m00120	AP005657	protein F1N19.25 [imported] - Arabidopsis thaliana
9636.m00121	AP005657	protein F1N19.25 [imported] - Arabidopsis thaliana
9636.m00154	AP003925	Adenylate kinase, putative
9637.m03424	AP006162	retrotransposon protein, putative, unclassified
9638.m00015	AC108883	Serine carboxypeptidase
9638.m00058	AC069324	transposon protein, putative, mariner sub-class
9638.m00107	AC068654	Peroxidase, putative
9635.m03818	AP005908	expressed protein
9635.m03845	AP003845	CMP-sialic acid transporter-like protein
9635.m03882	AP003804	LHCI-680, photosystem I antenna protein - barley
9635.m03951	AP003803	Armadillo/beta-catenin-like repeat, putative
9635.m03960	AP003803	retrotransposon protein, putative, Ty1-copia sub-class
9635.m03977	AP003985	expressed protein
9635.m04067	AP003915	Similar to rRNA methylase-like protein - Arabidopsis thaliana
9635.m04119	AP005807	Nuclear transport factor 2 (NTF2) domain, putative
9635.m04369	AP004306	Myb-like DNA-binding domain, putative
9635.m04396	AP004339	Glycosyl hydrolases family 18
9635.m04417	AP004339	expressed protein
9635.m04484	AP005292	Thymidylate kinase, putative
9635.m04504	AP004671	expressed protein
9635.m04620	AP006460	retrotransposon protein, putative, unclassified
9635.m04641	AP005182	hypothetical protein
9635.m04755	AP004274	expressed protein
9635.m04765	AP004570	hypothetical protein
9635.m04775	AP004300	hypothetical protein
9635.m04800	AP004300	universal stress protein family
9635.m04810	AP004343	expressed protein
9635.m04847	AP003757	Peroxidase, putative
9635.m04919	AP003818	RINT-1 / TIP-1 family, putative
9635.m04979	AP004333	ubiquitin-activating enzyme E1
9635.m05002	AP005199	Response regulator receiver domain, putative
9636.m00003	AP005406	expressed protein
9636.m00041	AP003909	Integral membrane protein, putative
9636.m00047	AP003909	Similar to P450
9636.m00123	AP005657	plant-specific FAD-dependent oxidoreductase
9636.m00142	AP004562	EF hand, putative
9636.m00177	AP004374	expressed protein
9636.m03061	AP004137	retrotransposon protein, putative, unclassified
9636.m03079	AP003947	AT4g29820/F27B13_60
9636.m03143	AP004691	expressed protein
9636.m03177	AP005158	NB-ARC domain, putative
9636.m03262	AP005301	expressed protein
9636.m03263	AP005301	expressed protein
9637.m03403	AP005546	expressed protein
9637.m03422	AP006162	expressed protein
9637.m03432	AP006162	pollen allergen Phl p 11
9638.m00050	AC099400	Homeobox associated leucine zipper, putative
9635.m03869	AP003758	expressed protein
9635.m03885	AP003804	expressed protein
9635.m03936	AP003747	GRAS family transcription factor, putative
9635.m03948	AP003747	RNA recognition motif. (a.k.a. RRM, RBD, or RNP domain), putative
9635.m04045	AP004275	transposon protein, putative, CACTA, En/Spm sub-class
9635.m04060	AP004275	Leucine Rich Repeat, putative
9635.m04094	AP003840	expressed protein
9635.m04115	AP005807	protein kinase, putative
9635.m04167	AP005193	Similar to contains similarity to pectin methylesterase gene_id:MDF20.3
9635.m04172	AP006458	hypothetical protein
9635.m04235	AP005198	expressed protein
9635.m04251	AP004988	FMN-dependent dehydrogenase
9635.m04301	AP004380	oxidoreductase, zinc-binding dehydrogenase family
9635.m04307	AP004341	UDP-glucoronosyl and UDP-glucosyl transferase
9635.m04423	AP004334	HAD-superfamily hydrolase, subfamily IA, variant 3, putative
9635.m04456	AP005292	hypothetical protein
9635.m04512	AP003765	expressed protein
9635.m04530	AP005455	hypothetical protein
9635.m04576	AP004272	retrotransposon protein, putative, unclassified
9635.m04629	AP006460	Similar to BLE2 protein
9635.m04651	AP005184	Glycosyl hydrolase family 1
9635.m04660	AP005184	Sec31p
9635.m04675	AP003833	expressed protein
9635.m04706	AP005452	RNA recognition motif. (a.k.a. RRM, RBD, or RNP domain), putative
9635.m04742	AP004274	expressed protein
9635.m04745	AP004274	Tub family, putative
9635.m04788	AP004300	hypothetical protein
9635.m04801	AP004300	RNA recognition motif. (a.k.a. RRM, RBD, or RNP domain), putative
9635.m04824	AP004343	pectin methylesterase, putative
9635.m04859	AP005243	AY062474 Similar to bZIP transcription factors
9635.m04878	AP005099	expressed protein
9635.m04887	AP005167	expressed protein
9635.m04913	AP003818	bZIP transcription factor, putative
9635.m04937	AP003816	Armadillo/beta-catenin-like repeat, putative
9635.m04989	AP004333	hypothetical protein
9635.m05020	AP003835	Similar to cytosine-5 DNA methyltransferase MET1
9635.m05029	AP004347	transposon protein, putative, CACTA, En/Spm sub-class
9636.m00014	AP005406	Cytochrome b561
9636.m00018	AP005406	hypothetical protein
9636.m00058	AP004462	expressed protein
9636.m00105	AP004566	expressed protein
9636.m00110	AP004566	peroxidase 47 precursor (ec 1.11.1.7) (atperox p47) (atp32)
9636.m00170	AP003925	Similar to DNA polymerase III gamma chain homolog F22K18.10 - Arabidopsis thaliana
9635.m03797	AP003981	Remorin, C-terminal region, putative
9635.m03804	AP003981	Zinc finger, C2H2 type, putative
9635.m03840	AP003845	adenylylsulfate kinase, putative
9635.m03975	AP005437	GRAS family transcription factor, putative
9635.m03978	AP003985	expressed protein
9635.m04021	AP003846	Eukaryotic aspartyl protease, putative
9635.m04078	AP003840	expressed protein
9635.m04176	AP006458	hypothetical protein
9635.m04227	AP005198	transposon protein, putative, mariner sub-class
9635.m04313	AP004341	CG-1 domain, putative
9635.m04422	AP004334	expressed protein
9635.m04446	AP003749	Plant disease resistance response protein
9635.m04450	AP003749	expressed protein
9635.m04505	AP004671	expressed protein
9635.m04516	AP003832	bZIP transcription factor, putative
9635.m04552	AP003822	hypothetical protein
9635.m04613	AP006456	transposon protein, putative, CACTA, En/Spm sub-class
9635.m04698	AP005452	Zinc finger, C3HC4 type (RING finger), putative
9635.m04713	AP003825	RNA recognition motif. (a.k.a. RRM, RBD, or RNP domain), putative
9635.m04729	AP003825	oxidoreductase, short chain dehydrogenase/reductase family
9635.m04753	AP004274	Protein kinase domain, putative
9635.m04814	AP004343	Similar to At3g16670/MGL6_12
9635.m04823	AP004343	Similar to acetyl-coA dehydrogenase, putative
9635.m04844	AP003817	peroxidase 2 precursor (ec 1.11.1.7)
9635.m04866	AP005099	Similar to vacuolar targeting receptor bp-80
9635.m04899	AP005167	Similar to GRAB2 protein
9635.m04910	AP003818	Ethylene insensitive 3, putative
9635.m04911	AP003818	oxidoreductase, short chain dehydrogenase/reductase family, putative
9635.m04956	AP004316	BRCA1 C Terminus (BRCT) domain, putative
9635.m04966	AP004333	D-ala D-ala ligase, putative
9635.m05010	AP005199	Myb-like DNA-binding domain, putative
9636.m00048	AP004462	P450
9636.m00074	AP004584	hypothetical protein
9636.m00094	AP004584	expressed protein
9636.m00147	AP004562	retrotransposon protein, putative, unclassified
9636.m00205	AP005730	Protein kinase domain, putative
9636.m01589	AP005157	retrotransposon protein, putative, Ty1-copia sub-class
9637.m03380	AP005546	hypothetical protein
9637.m03389	AP005546	HAD-superfamily hydrolase, subfamily IA, variant 3, putative
9637.m03392	AP005546	cleavage and polyadenylation specificity factor, 100 kda subunit (cpsf100 kda subunit)
9637.m03426	AP006162	ABC transporter, putative
9638.m00168	AC078891	transposon protein, putative, CACTA, En/Spm sub-class
9635.m03808	AP003981	Insulinase (Peptidase family M16), putative
9635.m03940	AP003747	Yippee putative zinc-binding protein
9635.m03941	AP003747	Yippee putative zinc-binding protein
9635.m03944	AP003747	hypothetical protein
9635.m03980	AP003985	peptide chain release factor eRF/aRF, subunit 1
9635.m03991	AP005149	expressed protein
9635.m04009	AP003750	expressed protein
9635.m04059	AP004275	expressed protein
9635.m04092	AP003840	expressed protein
9635.m04110	AP005807	HDA1
9635.m04169	AP005193	hAT family dimerisation domain, putative
9635.m04232	AP005198	Proteasome A-type and B-type, putative
9635.m04270	AP004988	dihydropteroate synthase, putative
9635.m04271	AP004309	FYVE zinc finger, putative
9635.m04282	AP004309	expressed protein
9635.m04305	AP004380	phospho-2-dehydro-3-deoxyheptonate aldolase
9635.m04314	AP004341	Heavy-metal-associated domain, putative
9635.m04384	AP004260	glycosyl transferase, group 2 family protein, putative
9635.m04385	AP004260	expressed protein
9635.m04425	AP004334	Pectinacetylesterase
9635.m04447	AP003749	Protein kinase domain, putative
9635.m04459	AP005292	hypothetical protein
9635.m04501	AP004671	SNF2 family N-terminal domain, putative
9635.m04526	AP003832	hypothetical protein
9635.m04557	AP003822	RING zinc finger protein, putative
9635.m04591	AP006459	retrotransposon protein, putative, Ty3-gypsy sub-class
9635.m04653	AP005184	expressed protein
9635.m04661	AP003833	hypothetical protein
9635.m04668	AP003833	RhoGAP domain, putative
9635.m04673	AP003833	expressed protein
9635.m04707	AP005452	expressed protein
9635.m04805	AP004300	Hypoxia induced protein conserved region, putative
9635.m04873	AP005099	Protein kinase domain, putative
9635.m04884	AP005099	Zinc finger C-x8-C-x5-C-x3-H type (and similar), putative
9635.m04923	AP003818	hypothetical protein
9635.m04934	AP003816	expressed protein
9635.m04950	AP003816	expressed protein
9635.m04952	AP003816	probable nicotianamine synthase 3 (ec 2.5.1.43) (s-adenosyl-l-methionine:s-adenosyl-l-methionine:s-adenosyl-methion ine 3-amino-3-carboxypropyltransferase 3) (osnas3)
9635.m04994	AP005199	beta3-glucuronyltransferase
9635.m05004	AP005199	expressed protein
9636.m00022	AP004654	expressed protein
9636.m00225	AP004166	Protein kinase domain, putative
9636.m00253	AP003886	step II splicing factor, putative
9637.m03401	AP005546	oxidoreductase, short chain dehydrogenase/reductase family
9637.m03406	AP006162	probable histone H2B - chicken (fragment)
9637.m03409	AP006162	Similar to probable pectinesterase [imported] - Arabidopsis thaliana
9635.m03826	AP005908	Prp18 domain, putative
9635.m03827	AP005908	Similar to probable WD-repeat protein [imported] - Arabidopsis thaliana
9635.m03842	AP003845	FYVE zinc finger, putative
9635.m03843	AP003845	expressed protein
9635.m03868	AP003758	expressed protein
9635.m03888	AP003804	probable serine proteinase [imported] - Arabidopsis thaliana
9635.m03910	AP004276	expressed protein
9635.m03920	AP004276	Homeobox domain, putative
9635.m03932	AP003747	mTERF, putative
9635.m03985	AP003985	Formin Homology 2 Domain, putative
9635.m04019	AP003846	oxidoreductase, short chain dehydrogenase/reductase family
9635.m04024	AP003846	GH3 auxin-responsive promoter
9635.m04056	AP004275	retrotransposon protein, putative, unclassified
9635.m04095	AP003840	expressed protein
9635.m04104	AP004230	expressed protein
9635.m04120	AP005807	expressed protein
9635.m04168	AP005193	expressed protein
9635.m04184	AP005895	peroxisome assembly protein 10 (peroxin-10) (athpex10) (pex10p)(per8)
9635.m04248	AP004988	Beta-ketoacyl synthase, N-terminal domain, putative
9635.m04260	AP004988	transposon protein, putative, mariner sub-class
9635.m04303	AP004380	Protein kinase domain
9635.m04375	AP004306	retrotransposon protein, putative, Ty3-gypsy sub-class
9635.m04436	AP003749	Uncharacterized protein family
9635.m04478	AP005292	Peroxidase, putative
9635.m04507	AP003765	expressed protein
9635.m04510	AP003765	expressed protein
9635.m04556	AP003822	RING zinc finger protein, putative
9635.m04657	AP005184	hypothetical protein
9635.m04658	AP005184	Serine carboxypeptidase
9635.m04716	AP003825	oxidoreductase, short chain dehydrogenase/reductase family, putative
9635.m04762	AP004570	hypothetical protein
9635.m04819	AP004343	AP2 domain, putative
9635.m04850	AP003757	Protein kinase domain, putative
9635.m04868	AP005099	WRKY DNA -binding domain, putative
9635.m04869	AP005099	Similar to probable SNF2/SWI2 family transcription factor [imported] - Arabidopsis thaliana
9635.m04936	AP003816	Myb-like DNA-binding domain, putative
9635.m04958	AP004316	PHD-finger, putative
9636.m00062	AP004462	expressed protein
9636.m00082	AP004584	Similar to cytokinin-regulated kinase 1
9636.m00103	AP004566	HCBT-like putative defense response protein
9636.m00125	AP005657	Similar to T25K16.10
9636.m00150	AP004562	AF528064 ACR8
9636.m00195	AP005730	retrotransposon protein, putative, unclassified
9637.m03427	AP006162	ABC transporter, putative
9638.m00008	AC108883	U-box domain, putative
9638.m00010	AC108883	pyridoxine biosynthesis protein
9638.m00012	AC108883	Protein kinase domain, putative
9638.m00013	AC108883	Serine carboxypeptidase
9638.m00054	AC069324	transposon protein, putative, CACTA, En/Spm sub-class
9635.m03838	AP003845	40s ribosomal protein s13. [maize
9635.m03844	AP003845	Similar to protein F5O11.12 [imported] - Arabidopsis thaliana
9635.m03956	AP003803	Mo25 protein family
9635.m03968	AP005437	GDSL-like Lipase/Acylhydrolase
9635.m03971	AP005437	ubiquitin activating enzyme, putative
9635.m04043	AP003846	DHHC zinc finger domain, putative
9635.m04052	AP004275	Protein kinase domain, putative
9635.m04106	AP004230	expressed protein
9635.m04170	AP005193	undecaprenyl diphosphate synthase, putative
9635.m04278	AP004309	expressed protein
9635.m04350	AP004009	4-alpha-glucanotransferase
9635.m04395	AP004339	RNA recognition motif. (a.k.a. RRM, RBD, or RNP domain), putative
9635.m04409	AP004339	expressed protein
9635.m04414	AP004339	expressed protein
9635.m04443	AP003749	Plant disease resistance response protein
9635.m04646	AP005182	expressed protein
9635.m04726	AP003825	oxidoreductase, short chain dehydrogenase/reductase family
9635.m04748	AP004274	B-box zinc finger, putative
9635.m04817	AP004343	Eukaryotic ribosomal protein L18
9635.m04842	AP003817	peroxidase
9635.m04843	AP003817	peroxidase (EC 1.11.1.7) precursor - rice
9635.m04862	AP005243	B3 DNA binding domain, putative
9635.m04915	AP003818	Zinc finger, C3HC4 type (RING finger), putative
9635.m04931	AP003816	WSI76 protein - rice
9635.m04967	AP004333	oxidoreductase, short chain dehydrogenase/reductase family
9635.m04978	AP004333	ubiquitin-activating enzyme E1
9635.m04986	AP004333	hypothetical protein
9635.m04990	AP005199	phosphoinositide-specific phospholipase C
9635.m05009	AP005199	2-oxoglutarate dehydrogenase, E1 component
9635.m05024	AP003758	Protein kinase domain, putative
9636.m00038	AP003909	ferredoxin i, chloroplast precursor (anti-disease protein 1)
9636.m00104	AP004566	hypothetical protein
9636.m00113	AP004566	U-box domain, putative
9636.m00137	AP004562	avr9 homolog F9L11.10 [imported] - Arabidopsis thaliana
9636.m00200	AP005730	hypothetical protein
9636.m03587	AP004586	expressed protein
9637.m03342	AP006170	transposon protein, putative, CACTA, En/Spm sub-class
9637.m03410	AP006162	hypothetical protein
9638.m00059	AC069324	Protein kinase domain, putative
9638.m00065	AC069324	expressed protein
9638.m00095	AC068654	Transferase family
9638.m00110	AC068654	Peroxidase, putative
9638.m00125	AC079685	POT family, putative
9638.m00127	AC079685	Putative LeOPT1 - oligopeptide transporter
9635.m03810	AP005908	Insulinase (Peptidase family M16), putative
9635.m03866	AP003758	Protein kinase domain, putative
9635.m03875	AP003804	GH3 auxin-responsive promoter
9635.m03915	AP004276	expressed protein
9635.m03924	AP004185	sugar transporter, putative
9635.m03947	AP003747	RNA recognition motif. (a.k.a. RRM, RBD, or RNP domain), putative
9635.m03983	AP003985	expressed protein
9635.m04058	AP004275	retrotransposon protein, putative, unclassified
9635.m04075	AP003915	hypothetical protein
9635.m04159	AP005193	hypothetical protein
9635.m04162	AP005193	expressed protein
9635.m04175	AP006458	hypothetical protein
9635.m04181	AP005895	retrotransposon protein, putative, unclassified
9635.m04187	AP005895	expressed protein
9635.m04234	AP005198	hypothetical protein
9635.m04250	AP004988	FMN-dependent dehydrogenase
9635.m04308	AP004341	transposon protein, putative, mariner sub-class
9635.m04364	AP004306	Helix-loop-helix DNA-binding domain, putative
9635.m04412	AP004339	IQ calmodulin-binding motif, putative
9635.m04555	AP003822	RING zinc finger protein, putative
9635.m04626	AP006460	expressed protein
9635.m04749	AP004274	expressed protein
9635.m04754	AP004274	Protein kinase domain, putative
9635.m04756	AP004274	expressed protein
9635.m04791	AP004300	ATPase, AAA family, putative
9635.m04796	AP004300	Ribosomal protein S8e
9635.m04813	AP004343	Similar to At3g16660
9635.m04818	AP004343	AP2 domain, putative
9635.m04886	AP005167	expressed protein
9635.m04933	AP003816	Ser/Thr protein phosphatase, putative
9635.m04938	AP003816	Armadillo/beta-catenin-like repeat, putative
9635.m04959	AP004316	retrotransposon protein, putative, unclassified
9636.m00005	AP005406	probable transcription factor HUA2 [imported] - Arabidopsis thaliana
9636.m00015	AP005406	expressed protein
9636.m00066	AP004462	invertase inhibitor homolog, putative
9636.m00111	AP004566	pfkB family carbohydrate kinase
9636.m00122	AP005657	endoglucanase 1 precursor (ec 3.2.1.4) (endo-1,4-beta-glucanase)(abscission cellulase 1)
9637.m03399	AP005546	Zinc finger, C2H2 type, putative
9637.m03436	AP005314	Similar to contains similarity to Arabidopsis membrane-associated salt-inducible-like protein
9637.m03455	AP005678	transposon protein, putative, CACTA, En/Spm sub-class
9635.m03802	AP003981	expressed protein
9635.m03837	AP003845	probable mitogen activated protein kinase - rice
9635.m03871	AP003804	hypothetical protein
9635.m03913	AP004276	Polyprenyl synthetase, putative
9635.m03943	AP003747	MAP kinase-like protein
9635.m03967	AP005437	GDSL-like Lipase/Acylhydrolase
9635.m04077	AP003840	Cobalamin synthesis protein/P47K
9635.m04259	AP004988	Plant disease resistance response protein
9635.m04272	AP004309	FYVE zinc finger, putative
9635.m04277	AP004309	expressed protein
9635.m04299	AP004380	Helicase associated domain (HA2), putative
9635.m04312	AP004341	expressed protein
9635.m04315	AP004341	RNA recognition motif. (a.k.a. RRM, RBD, or RNP domain), putative
9635.m04353	AP004009	Myb-like DNA-binding domain, putative
9635.m04402	AP004339	DnaJ domain, putative
9635.m04631	AP005182	hypothetical protein
9635.m04634	AP005182	transposon protein, putative, CACTA, En/Spm sub-class
9635.m04637	AP005182	hypothetical protein
9635.m04640	AP005182	PWWP domain, putative
9635.m04744	AP004274	sodium/hydrogen exchanger 3
9635.m04840	AP003817	Peroxidase, putative
9635.m04861	AP005243	B3 DNA binding domain, putative
9635.m04890	AP005167	No apical meristem (NAM) protein, putative
9635.m04891	AP005167	Similar to r40g3 protein - rice
9635.m04921	AP003818	Protein kinase domain, putative
9635.m04949	AP003816	ATP-dependent protease La
9635.m04976	AP004333	SNF2 family N-terminal domain, putative
9635.m05003	AP005199	protein serine/threonine kinase BNK1
9635.m05005	AP005199	expressed protein
9636.m00032	AP004654	hypothetical protein
9636.m00064	AP004462	expressed protein
9636.m00083	AP004584	expressed protein
9636.m00086	AP004584	expressed protein
9636.m00088	AP004584	expressed protein
9636.m00138	AP004562	kinesin heavy chain-like protein - Arabidopsis thaliana
9636.m00152	AP003925	Similar to auxin-induced SAUR-like protein
9636.m00163	AP003925	succinate dehydrogenase and fumarate reductase iron-sulfur protein
9636.m00174	AP004374	Fructose-bisphosphate aldolase class-I
9637.m03371	AP005558	expressed protein
9637.m03383	AP005546	Ribosomal L40e family, putative
9637.m03453	AP005553	retrotransposon protein, putative, unclassified
9635.m03824	AP005908	expressed protein
9635.m04072	AP003915	expressed protein
9635.m04116	AP005807	glycerophosphodiester phosphodiesterase-like protein
9635.m04139	AP005175	SRF-type transcription factor (DNA-binding and dimerisation domain), putative
9635.m04145	AP005175	transposon protein, putative, mariner sub-class
9635.m04161	AP005193	expressed protein
9635.m04166	AP005193	expressed protein
9635.m04226	AP005198	Protein kinase domain, putative
9635.m04244	AP005198	RNA recognition motif. (a.k.a. RRM, RBD, or RNP domain), putative
9635.m04252	AP004988	ribosomal protein S2, putative
9635.m04387	AP004339	Zinc finger, C3HC4 type (RING finger), putative
9635.m04394	AP004339	EF hand, putative
9635.m04451	AP003749	ATPase, histidine kinase-, DNA gyrase B-, and HSP90-like domain protein, putative
9635.m04460	AP005292	expressed protein
9635.m04463	AP005292	AhpC/TSA family, putative
9635.m04474	AP005292	Peroxidase, putative
9635.m04481	AP005292	pyrrolidone-carboxylate peptidase
9635.m04500	AP004671	Transport protein particle (TRAPP) component, Bet3
9635.m04671	AP003833	Eukaryotic aspartyl protease
9635.m04691	AP004378	expressed protein
9635.m04701	AP005452	expressed protein
9635.m04724	AP003825	oxidoreductase, short chain dehydrogenase/reductase family
9635.m04849	AP003757	expressed protein
9635.m04879	AP005099	ATP-dependent DNA helicase, RecQ family, putative
9635.m04909	AP003818	Ethylene insensitive 3, putative
9635.m04917	AP003818	expressed protein
9635.m04920	AP003818	Protein kinase domain, putative
9635.m04930	AP003816	expressed protein
9635.m04932	AP003816	Ser/Thr protein phosphatase, putative
9635.m04981	AP004333	Thiamine pyrophosphate enzyme, central domain, putative
9635.m04996	AP005199	Peroxidase, putative
9635.m05017	AP003847	hAT family dimerisation domain, putative
9636.m00007	AP005406	Similar to transcription or splicing factor-like protein
9636.m00008	AP005406	expressed protein
9636.m00112	AP004566	AT4g24270/T22A6_100
9636.m00134	AP004562	acidic ribosomal protein P1a - maize
9636.m00144	AP004562	receptor-like protein kinase
9636.m00190	AP005730	expressed protein
9637.m03353	AP006171	expressed protein
9637.m03359	AP006171	retrotransposon protein, putative, unclassified
9635.m03823	AP005908	expressed protein
9635.m03835	AP003845	retrotransposon protein, putative, unclassified
9635.m03880	AP003804	ubiquitin-conjugating enzyme
9635.m03981	AP003985	Armadillo/beta-catenin-like repeat, putative
9635.m04062	AP004275	transposon protein, putative, mariner sub-class
9635.m04133	AP005175	phytochelatin synthetase-like protein
9635.m04182	AP005895	retrotransposon protein, putative, unclassified
9635.m04186	AP005895	expressed protein
9635.m04206	AP003700	transposon protein, putative, CACTA, En/Spm sub-class
9635.m04347	AP004009	MOZ/SAS family, putative
9635.m04368	AP004306	Protein kinase domain, putative
9635.m04383	AP004260	malate dehydrogenase, NAD-dependent, putative
9635.m04410	AP004339	RNA recognition motif. (a.k.a. RRM, RBD, or RNP domain), putative
9635.m04419	AP004339	expressed protein
9635.m04427	AP004334	Myb-like DNA-binding domain, putative
9635.m04462	AP005292	AhpC/TSA family, putative
9635.m04492	AP004671	Protein kinase domain, putative
9635.m04495	AP004671	chaperonin, 10 kDa
9635.m04551	AP003822	BSD domain, putative
9635.m04578	AP004272	hypothetical protein
9635.m04663	AP003833	hypothetical protein
9635.m04678	AP003833	Non-SMC condensin subunit, XCAP-D2/Cnd1, putative
9635.m04686	AP004378	UDP-glucoronosyl and UDP-glucosyl transferase
9635.m04723	AP003825	oxidoreductase, short chain dehydrogenase/reductase family, putative
9635.m04809	AP004343	Ribosomal L22e protein family
9635.m04854	AP003757	potassium uptake protein
9635.m04894	AP005167	r40g2 protein - rice (fragment)
9635.m04904	AP005167	Similar to transfactor
9635.m04907	AP003818	hydrolase, alpha/beta fold family, putative
9635.m04926	AP003818	expressed protein
9635.m04929	AP003816	expressed protein
9635.m04982	AP004333	Importin-beta N-terminal domain, putative
9635.m04983	AP004333	AMP deaminase, putative
9635.m04993	AP005199	peroxidase
9636.m00004	AP005406	AL021961 putative protein
9636.m00087	AP004584	expressed protein
9636.m00090	AP004584	U-box domain, putative
9636.m00115	AP004566	expressed protein
9637.m03302	AP005090	hypothetical protein
9637.m03352	AP006171	Similar to AL132969 sterol C-14 reductase
9637.m03372	AP005558	fatty acyl coA reductase
9637.m03378	AP005546	expressed protein
9637.m03407	AP006162	hypothetical protein
9637.m03413	AP006162	Lipase, putative
9635.m03796	AP003981	expressed protein
9635.m03858	AP003845	tubulin alpha-1 chain
9635.m03870	AP003804	expressed protein
9635.m03887	AP003804	expressed protein
9635.m03917	AP004276	expressed protein
9635.m03926	AP004185	retrotransposon protein, putative, Ty1-copia sub-class
9635.m04055	AP004275	translation initiation factor eIF-5A
9635.m04109	AP005807	HDA1
9635.m04148	AP005193	Sulfotransferase domain, putative
9635.m04246	AP005198	FAR1 family, putative
9635.m04249	AP004988	expressed protein
9635.m04288	AP004309	DnaJ domain, putative
9635.m04297	AP004380	hypothetical protein
9635.m04298	AP004380	GRAM domain, putative
9635.m04316	AP004341	RNA recognition motif. (a.k.a. RRM, RBD, or RNP domain), putative
9635.m04358	AP004306	GTP1/OBG family, putative
9635.m04421	AP004334	Ras family, putative
9635.m04431	AP004334	Cytochrome P450
9635.m04434	AP003752	Cytochrome P450
9635.m04527	AP003832	Phosphatidylinositol 3- and 4-kinase, putative
9635.m04627	AP006460	hypothetical protein
9635.m04644	AP005182	expressed protein
9635.m04700	AP005452	hypothetical protein
9635.m04708	AP005452	Tryptophan/tyrosine permease family
9635.m04758	AP004274	hypothetical protein
9635.m04851	AP003757	Protein kinase domain, putative
9635.m04885	AP005167	expressed protein
9635.m04895	AP005167	r40g3 protein - rice
9635.m04912	AP003818	Subtilase family, putative
9635.m04951	AP003816	expressed protein
9635.m04980	AP004333	Protein kinase domain, putative
9636.m00031	AP004654	hypothetical protein
9636.m00068	AP004462	transposon protein, putative, CACTA, En/Spm sub-class
9636.m00089	AP004584	expressed protein
9636.m00107	AP004566	expressed protein
9636.m00135	AP004562	Similar to VPS13-like protein
9636.m00141	AP004562	ribosomal protein S15, putative
9636.m00164	AP003925	succinate dehydrogenase and fumarate reductase iron-sulfur protein
9636.m00167	AP003925	succinate dehydrogenase and fumarate reductase iron-sulfur protein
9636.m00173	AP004374	topoisomerase, putative
9637.m03374	AP005558	Similar to WD repeat domain protein - Arabidopsis thaliana
9637.m03387	AP005546	S25 ribosomal protein
9637.m03391	AP005546	Lipase 3 N-terminal region, putative
9637.m03398	AP005546	Protein kinase domain, putative
9637.m03412	AP006162	peptidylprolyl isomerase (EC 5.2.1.8) Cyp1 - rice
9637.m03430	AP006162	receptor protein kinase-like protein
9638.m00007	AC108883	hypothetical protein
9635.m03812	AP005908	ribosome recycling factor, putative
9635.m03830	AP005908	expressed protein
9635.m03928	AP004185	AF482011 sorbitol transporter
9635.m03954	AP003803	C2 domain, putative
9635.m04068	AP003915	AT5g39360/MUL8_40
9635.m04091	AP003840	hypothetical protein
9635.m04124	AP005807	hypothetical protein
9635.m04130	AP005175	6-phosphogluconolactonase
9635.m04137	AP005175	expressed protein
9635.m04171	AP005193	undecaprenyl diphosphate synthase, putative
9635.m04174	AP006458	hypothetical protein
9635.m04283	AP004309	retrotransposon protein, putative, unclassified
9635.m04382	AP004260	malate dehydrogenase, NAD-dependent, putative
9635.m04403	AP004339	emp24/gp25L/p24 family
9635.m04503	AP004671	expressed protein
9635.m04536	AP005455	expressed protein
9635.m04666	AP003833	hypothetical protein
9635.m04680	AP003833	Seven in absentia protein family, putative
9635.m04685	AP004378	hypothetical protein
9635.m04687	AP004378	expressed protein
9635.m04786	AP004300	Heavy-metal-associated domain, putative
9635.m04896	AP005167	Similar to thioredoxin
9635.m05031	AP005173	retrotransposon protein, putative, unclassified
9636.m00042	AP003909	hypothetical protein
9636.m00076	AP004584	adenylate kinase, chloroplast (ec 2.7.4.3) (atp-amptransphosphorylase)
9636.m00084	AP004584	polyneuridine aldehyde esterase, putative
9636.m00093	AP004584	DNA-directed RNA polymerase, putative
9636.m00095	AP004584	defense response protein, putative
9636.m00146	AP004562	expressed protein
9636.m03312	AP005734	DNA repair protein Rad4, putative
9636.m03338	AP003881	UV excision repair protein Rad23
9636.m03374	AP004666	Myb-like DNA-binding domain, putative
9636.m03377	AP005757	expressed protein
9636.m03477	AP004564	Similar to receptor-like protein kinase INRPK1
9636.m03520	AP003871	hypothetical protein
9636.m03538	AP004662	cdc2 homolog
9637.m03285	AP005090	AY059162 AT4g30210/F9N11_60
9637.m03324	AP005396	potassium uptake protein
9637.m03350	AP006170	Similar to nuclear pore protein
9637.m03362	AP006171	Similar to CTR1-like protein kinase
9637.m03384	AP005546	germin-like protein 1
9635.m03803	AP003981	hypothetical protein
9635.m03819	AP005908	expressed protein
9635.m03861	AP003845	expressed protein
9635.m03864	AP003845	Glycosyl hydrolase family 20, catalytic domain, putative
9635.m03883	AP003804	succinyl-CoA ligase alpha subunit
9635.m03893	AP004182	5-formyltetrahydrofolate cyclo-ligase, putative
9635.m03923	AP004185	sugar transporter, putative
9635.m03942	AP003747	Yippee putative zinc-binding protein
9635.m03974	AP005437	expressed protein
9635.m04025	AP003846	expressed protein
9635.m04027	AP003846	Got1-like family, putative
9635.m04050	AP004275	Protein kinase domain, putative
9635.m04160	AP005193	Similar to transcription factor, CCAAT-binding, chain A - Arabidopsis thaliana
9635.m04165	AP005193	expressed protein
9635.m04295	AP004380	Cyclin, N-terminal domain, putative
9635.m04346	AP004009	Leucine Rich Repeat, putative
9635.m04367	AP004306	Protein kinase domain, putative
9635.m04424	AP004334	Pectinacetylesterase
9635.m04464	AP005292	hypothetical protein
9635.m04480	AP005292	pyrrolidone-carboxylate peptidase
9635.m04559	AP003822	expressed protein
9635.m04580	AP004272	expressed protein
9635.m04635	AP005182	transposon protein, putative, CACTA, En/Spm sub-class
9635.m04654	AP005184	expressed protein
9635.m04672	AP003833	Phosphatidylinositol-4-phosphate 5-Kinase, putative
9635.m04694	AP004378	expressed protein
9635.m04743	AP004274	sodium/hydrogen exchanger 3
9635.m04845	AP003757	Peroxidase, putative
9635.m04846	AP003757	peroxidase POC1
9635.m04856	AP003757	expressed protein
9635.m04858	AP005243	hypothetical protein
9635.m04870	AP005099	expressed protein
9635.m04872	AP005099	Domain found in IF2B/IF5, putative
9635.m04901	AP005167	Dof domain, zinc finger, putative
9635.m04925	AP003818	hypothetical protein
9635.m04963	AP004316	Phytochelatin synthetase-like conserved region, putative
9635.m04970	AP004333	26S proteasome subunit P45 family
9635.m04984	AP004333	expressed protein
9635.m04987	AP004333	Fatty acid desaturase, putative
9635.m04997	AP005199	expressed protein
9636.m00011	AP005406	hypothetical protein
9636.m00035	AP004654	hypothetical protein
9636.m00060	AP004462	Similar to F22G5.37
9636.m00139	AP004562	Similar to At1g01080/T25K16_7
9636.m00157	AP003925	hypothetical protein
9636.m00165	AP003925	succinate dehydrogenase and fumarate reductase iron-sulfur protein
9637.m03293	AP005090	expressed protein
9637.m03318	AP005396	SAG12 protein
9637.m03388	AP005546	expressed protein
9637.m03402	AP005546	expressed protein
9637.m03428	AP006162	ABC transporter, putative
9637.m03437	AP005313	transposon protein, putative, CACTA, En/Spm sub-class
9635.m02430	AP005200	retrotransposon protein, putative, unclassified
9635.m02476	AP005451	expressed protein
9635.m02590	AP005737	Cytochrome P450
9635.m02639	AP005641	Carbohydrate binding domain, putative
9635.m02696	AP005256	AT3g15480/MJK13_14
9635.m02702	AP003916	thioesterase family protein, putative
9635.m02783	AP003808	transposon protein, putative, CACTA, En/Spm sub-class
9635.m02805	AP003806	SET domain, putative
9635.m02938	AP003849	hypothetical protein
9635.m02995	AP005190	UDP-glucoronosyl and UDP-glucosyl transferase
9635.m02997	AP005190	Ribosomal L40e family, putative
9635.m03006	AP005190	retrotransposon protein, putative, Ty3-gypsy sub-class
9635.m03009	AP005190	UDP-glucoronosyl and UDP-glucosyl transferase
9635.m03108	AP005177	transposon protein, putative, CACTA, En/Spm sub-class
9635.m03178	AP005127	hypothetical protein
9635.m03202	AP005185	hypothetical protein
9635.m03210	AP005185	retrotransposon protein, putative, unclassified
9635.m03292	AP005103	Cytochrome P450
9635.m03297	AP005103	Cytochrome P450
9635.m03320	AP003930	NB-ARC domain, putative
9635.m03348	AP003827	Ribosomal protein L44, putative
9635.m03398	AP004990	retrotransposon protein, putative, Ty1-copia sub-class
9635.m03491	AP005810	Glycosyl hydrolases family 17, putative
9635.m03495	AP005810	Protein kinase domain, putative
9635.m03503	AP005810	retrotransposon protein, putative, Ty3-gypsy sub-class
9635.m03616	AP005126	S-locus glycoprotein family, putative
9635.m03626	AP005126	retrotransposon protein, putative, unclassified
9635.m03689	AP005195	probable chlorophyll a/b-binding protein - rice
9635.m03697	AP005195	expressed protein
9635.m03732	AP005296	hypothetical protein
9635.m02622	AP005752	TPR Domain, putative
9635.m02744	AP005448	expressed protein
9635.m02803	AP003806	Protein kinase domain, putative
9635.m02940	AP003849	Myb-like DNA-binding domain, putative
9635.m03029	AP004051	expressed protein
9635.m03081	AP004259	hypothetical protein
9635.m03207	AP005185	UDP-glucoronosyl and UDP-glucosyl transferase
9635.m03283	AP005103	DEAD/DEAH box helicase, putative
9635.m03296	AP005103	Cytochrome P450
9635.m03342	AP003827	Ribosomal protein L44, putative
9635.m03460	AP003811	F-box domain, putative
9635.m03488	AP003863	Protein kinase domain, putative
9635.m03526	AP005786	Protein kinase domain, putative
9635.m03546	AP005156	beta-amylase
9635.m03690	AP005195	probable chlorophyll a/b-binding protein - rice
9635.m03752	AP003705	Similar to guanine nucleotide-exchange-like protein
9636.m01617	AP005095	transposon protein, putative, CACTA, En/Spm sub-class
9637.m03289	AP005090	hypothetical protein
9637.m03291	AP005090	Thioredoxin
9637.m03296	AP005090	expressed protein
9637.m03316	AP005396	transposon protein, putative, mariner sub-class
9637.m03357	AP006171	expressed protein
9637.m03386	AP005546	germin-like protein 1
9637.m03390	AP005546	beta-amylase (EC 3.2.1.2) - Arabidopsis thaliana
9638.m00055	AC069324	transposon protein, putative, CACTA, En/Spm sub-class
9638.m00057	AC069324	expressed protein
9635.m02550	AP004395	expressed protein
9635.m02776	AP003808	Leucine Rich Repeat, putative
9635.m02785	AP003808	hAT family dimerisation domain, putative
9635.m02864	AP005261	RNA polymerase Rpb7, N-terminal domain, putative
9635.m02898	AP004299	transposon protein, putative, CACTA, En/Spm sub-class
9635.m02990	AP005515	retrotransposon protein, putative, Ty3-gypsy sub-class
9635.m03003	AP005190	transposon protein, putative, CACTA, En/Spm sub-class
9635.m03079	AP004259	FAR1 family, putative
9635.m03116	AP003995	Chalcone and stilbene synthases, N-terminal domain, putative
9635.m03203	AP005185	Similar to methionine aminopeptidase-like protein
9635.m03222	AP005196	hypothetical protein
9635.m03248	AP005176	retrotransposon protein, putative, unclassified
9635.m03257	AP004269	Uncharacterized ACR, COG1590, putative
9635.m03343	AP003827	Tpt phosphate/phosphoenolpyruvate translocator, putative
9635.m03371	AP004573	transposon protein, putative, CACTA, En/Spm sub-class
9635.m03417	AP004674	translation initiation factor SUI1, putative
9635.m03433	AP004674	hypothetical protein
9635.m03461	AP003811	F-box domain, putative
[truncated: 18,441 more rows]

## Sheet: rice orphan genes
Nonorphan genes in the TIGR annotation dataset
TIGR model name	GENBANK Accession	Descreptions
9629.m00006	AP003727	hypothetical protein
9629.m00034	AP003727	retrotransposon protein, putative, Ty1-copia sub-class
9629.m00094	AP002845	expressed protein
9629.m00101	AP002845	expressed protein
9629.m00104	AP002845	expressed protein
9629.m00124	AP002882	expressed protein
9629.m00126	AP002882	expressed protein
9629.m00127	AP002882	expressed protein
9629.m00208	AP002541	expressed protein
9629.m00218	AP002868	expressed protein
9629.m00219	AP002868	expressed protein
9629.m00220	AP002868	expressed protein
9629.m00305	AP002538	expressed protein
9629.m00313	AP002526	expressed protein
9629.m00323	AP002526	expressed protein
9629.m00441	AP003311	expressed protein
9629.m00477	AP002540	expressed protein
9629.m00333	AP003214	expressed protein
9629.m00343	AP003214	expressed protein
9629.m00480	AP002540	expressed protein
9629.m00476	AP002540	expressed protein
9629.m00562	AP003225	expressed protein
9629.m00568	AP003225	expressed protein
9629.m00503	AP002522	expressed protein
9629.m00458	AP002872	hypothetical protein
9629.m00479	AP002540	expressed protein
9640.m04070	AL731881	expressed protein
9640.m03718	AL845346	expressed protein
9640.m04147	BX000457	expressed protein
9640.m04340	AL731762	expressed protein
9640.m02990	AL845345	expressed protein
9640.m03878	AL954852	expressed protein
9640.m04116	AL713940	AT5g57120/MUL3_6
9640.m04311	AL831809	expressed protein
9640.m03985	AL732535	expressed protein
9640.m04245	AL831803	expressed protein
9640.m03362	AL713950	hypothetical protein
9640.m03716	AL845346	expressed protein
9640.m03896	AL954852	expressed protein
9640.m04317	AL831809	expressed protein
9640.m03946	AL928754	F-box domain, putative
9640.m03943	AL928754	expressed protein
9640.m03619	AL935070	retrotransposon protein, putative, Ty3-gypsy sub-class
9640.m04071	AL731881	expressed protein
9640.m04133	BX000457	expressed protein
9640.m03489	AL731757	expressed protein
9640.m04266	AL831803	expressed protein
9640.m03884	AL954852	expressed protein
9640.m03727	AL772425	expressed protein
9640.m04239	BX000561	expressed protein
9640.m03905	AL954829	expressed protein
9640.m03849	AL772427	expressed protein
9640.m04283	AC027133	expressed protein
9640.m03850	AL772427	expressed protein
9640.m03858	AL772423	expressed protein
9640.m03668	AL713908	hypothetical protein
9640.m04336	AL831809	expressed protein
9640.m03729	AL772425	expressed protein
9640.m04335	AL831809	retrotransposon protein, putative, Ty3-gypsy sub-class
9640.m03987	AL732535	expressed protein
9640.m04193	AL713945	expressed protein
9640.m03749	AL772425	hypothetical protein
9640.m03742	AL772425	expressed protein
9640.m02782	AL713941	hypothetical protein
9640.m02228	AL732381	expressed protein
9640.m02543	BX276100	expressed protein
9640.m03050	BX255875	expressed protein
9640.m03169	AL837527	expressed protein
9640.m03224	AL713900	expressed protein
9640.m03431	AL844497	expressed protein
9640.m03146	AL731759	expressed protein
9640.m03267	BX000456	hypothetical protein
9640.m03922	AL831797	expressed protein
9640.m03430	AL844497	expressed protein
9640.m03166	AL837527	hypothetical protein
9640.m03793	AL928774	expressed protein
9640.m03877	AL954852	expressed protein
9640.m03751	AL844878	hypothetical protein
9640.m03609	AL935070	hypothetical protein
9640.m03492	AL731742	expressed protein
9640.m02394	AL731753	retrotransposon protein, putative, Ty1-copia sub-class
9640.m02292	AL713910	expressed protein
9640.m03613	AL935070	transposon protein, putative, mariner sub-class
9640.m03750	AL772425	hypothetical protein
9640.m02172	AL731883	expressed protein
9640.m02194	AL731785	retrotransposon protein, putative, Ty3-gypsy sub-class
9640.m02637	BX649219	expressed protein
9640.m02537	BX276100	expressed protein
9640.m02511	AL713928	expressed protein
9640.m02589	AL731754	expressed protein
9640.m03160	AL837527	hypothetical protein
9640.m02674	AL713907	expressed protein
9640.m03554	AL732640	expressed protein
9640.m01598	AL731744	hypothetical protein
9640.m02425	AL954159	expressed protein
9640.m01733	AL731739	expressed protein
9640.m00857	AL713946	expressed protein
9640.m02171	AL731883	expressed protein
9640.m01856	AL954152	expressed protein
9640.m01811	AL831795	expressed protein
9640.m02398	AL731753	expressed protein
9640.m03157	AL837527	hypothetical protein
9640.m02393	AL731753	retrotransposon protein, putative, Ty1-copia sub-class
9640.m01615	AL731874	hypothetical protein
9640.m02019	BX000557	hypothetical protein
9640.m02703	AL713948	expressed protein
9640.m00793	BX001060	expressed protein
9640.m00450	AL954364	hypothetical protein
9640.m01170	AL713939	hypothetical protein
9640.m01105	AL831805	expressed protein
9640.m01126	AL732649	expressed protein
9640.m01404	AL772416	retrotransposon protein, putative, Ty3-gypsy sub-class
9640.m01411	AL772416	expressed protein
9640.m01114	AL732649	expressed protein
9640.m01736	AL731739	hypothetical protein
9640.m02448	AL772417	expressed protein
9640.m01993	AL731890	hypothetical protein
9640.m01290	AL731756	retrotransposon protein, putative, Ty1-copia sub-class
9640.m00831	AL928750	expressed protein
9640.m01112	AL732649	hypothetical protein
9640.m01810	AL831795	expressed protein
9640.m01356	AL831810	retrotransposon protein, putative, unclassified
9640.m02032	AL713955	retrotransposon protein, putative, Ty3-gypsy sub-class
9640.m02129	AL928777	expressed protein
9640.m02156	AL844879	hypothetical protein
9640.m01144	AL954156	expressed protein
9640.m00549	AL844498	expressed protein
9640.m00959	BX664711	expressed protein
9640.m02163	AL731883	expressed protein
9640.m01303	AL731872	polyprotein, putative
9640.m01632	AL713951	hypothetical protein
9640.m00427	AL928756	expressed protein
9640.m01377	AL732531	expressed protein
9640.m01481	AL928776	expressed protein
9640.m00807	BX001060	expressed protein
9640.m00509	AL954632	expressed protein
9640.m00126	BX000511	expressed protein
9640.m00673	AL731761	hypothetical protein
9640.m01153	AL713939	expressed protein
9640.m00548	AL844498	expressed protein
9640.m00389	AL928783	hypothetical protein
9639.m04161	AC133609	expressed protein
9640.m00539	AL844498	expressed protein
9640.m00684	AL732638	expressed protein
9640.m00794	BX001060	expressed protein
9640.m01344	AL831810	transposon protein, putative, CACTA, En/Spm sub-class
9640.m01284	AL732648	hypothetical protein
9640.m00294	BX000498	expressed protein
9640.m00725	AL731882	expressed protein
9640.m00752	AL954158	expressed protein
9640.m01109	AL831805	expressed protein
9639.m04377	AC146937	expressed protein
9640.m00551	AL844498	hypothetical protein
9640.m00172	BX000505	expressed protein
9640.m00493	AL929350	expressed protein
9640.m00607	AL713936	expressed protein
9639.m03754	AC144716	expressed protein
9639.m03822	AC125780	F-box domain, putative
9639.m03883	AC113249	expressed protein
9639.m03954	AC125781	expressed protein
9640.m00702	AL732376	expressed protein
9640.m00174	BX000505	expressed protein
9639.m04270	AC135644	retrotransposon protein, putative, unclassified
9640.m00173	BX000505	expressed protein
9640.m00577	AL713906	hypothetical protein
9639.m04319	AC145395	expressed protein
9640.m00059	BX000494	expressed protein
9639.m03053	AC108223	expressed protein
9639.m04496	AC133008	expressed protein
9639.m03714	AF161269	expressed protein
9639.m03966	AC137751	expressed protein
9639.m03658	AC120885	expressed protein
9639.m03669	AC120885	expressed protein
9640.m00102	BX000510	expressed protein
9639.m03963	AC137751	expressed protein
9639.m04074	AC125783	expressed protein
9639.m03856	AC145349	expressed protein
9639.m03927	AC122143	hypothetical protein
9640.m00253	BX000507	expressed protein
9640.m00089	BX000492	expressed protein
9639.m03573	AC121328	hypothetical protein
9639.m02427	AC135864	hypothetical protein
9639.m03328	AC109929	hypothetical protein
9639.m03325	AC109929	expressed protein
9639.m03965	AC137751	expressed protein
9639.m03689	AC104844	expressed protein
9639.m02473	AC137113	expressed protein
9639.m03138	AC134624	hypothetical protein
9639.m03817	AC125780	hypothetical protein
9639.m03720	AC104845	expressed protein
9639.m03741	AC146766	hypothetical protein
9639.m03264	AC137693	expressed protein
9639.m04160	AC133609	hypothetical protein
9639.m02664	AC137745	expressed protein
9639.m03006	AC133248	hypothetical protein
9639.m03561	AC109594	expressed protein
9639.m02668	AC137745	expressed protein
9639.m03174	AC137753	expressed protein
9639.m03464	AC137744	F-box domain, putative
9639.m03392	AC104847	expressed protein
9639.m02255	AC145812	retrotransposon protein, putative, Ty3-gypsy sub-class
9639.m02855	AC136491	expressed protein
9639.m03737	AC146766	expressed protein
9639.m03178	AC136956	expressed protein
9639.m02849	AC136150	expressed protein
9639.m02989	AC134256	hypothetical protein
9639.m03186	AC136956	expressed protein
9639.m02448	AC135242	expressed protein
9639.m03127	AC119678	hypothetical protein
9639.m02752	AC135569	expressed protein
9639.m03471	AC137744	expressed protein
9639.m02050	AC146939	expressed protein
9639.m03967	AC137751	expressed protein
9639.m02771	AC124151	expressed protein
9639.m02404	AC137752	expressed protein
9639.m01890	AC138195	hypothetical protein
9639.m02347	AC146526	hypothetical protein
9639.m02186	AC133931	expressed protein
9639.m02981	AC134256	expressed protein
9639.m00731	AC135794	expressed protein
9639.m01889	AC138195	expressed protein
9639.m01414	AC145364	expressed protein
9639.m01591	AC135957	expressed protein
9639.m02880	AC133710	hypothetical protein
9639.m00864	AC139170	expressed protein
9639.m02295	AC145367	Zinc finger, C2H2 type, putative
9639.m00533	AC133217	expressed protein
9639.m01171	AC119071	hypothetical protein
9639.m01116	AC133005	expressed protein
9639.m01031	AC123520	expressed protein
9639.m01001	AC123515	expressed protein
9639.m00509	AC133217	expressed protein
9639.m01002	AC123515	hypothetical protein
9639.m00988	AC123521	expressed protein
9639.m00820	AC134046	expressed protein
9639.m00542	AC120534	expressed protein
9639.m00417	BX000499	hypothetical protein
9639.m00133	BX000512	expressed protein
9639.m00938	AC145321	hypothetical protein
9639.m00761	AC134047	expressed protein
9639.m00868	AC139170	expressed protein
9639.m00270	AC123516	hypothetical protein
9639.m01194	AC136971	hypothetical protein
9639.m01476	AC138197	expressed protein
9639.m00414	BX000499	hypothetical protein
9639.m01219	AC135258	retrotransposon protein, putative, Ty3-gypsy sub-class
9639.m00735	AC135794	expressed protein
9639.m01240	AC145809	hypothetical protein
9639.m01259	AC137993	expressed protein
9639.m02065	AC146939	expressed protein
9638.m03824	AC077693	hypothetical protein
9639.m00564	AC120533	expressed protein
9639.m00967	AC123522	hypothetical protein
9639.m00102	BX000493	expressed protein
9639.m00519	AC133217	expressed protein
9638.m03526	AC092697	expressed protein
9638.m03515	AC092389	expressed protein
9639.m00043	BX000501	hypothetical protein
9639.m00499	AC134048	hypothetical protein
9638.m03615	AC025783	expressed protein
9639.m00411	AC123526	hypothetical protein
9638.m03700	AC069300	hypothetical protein
9639.m00337	AC123528	hypothetical protein
9638.m03851	AC077693	hypothetical protein
9639.m00280	AC123516	hypothetical protein
9639.m00870	AC139170	expressed protein
9639.m00696	AC120539	expressed protein
9638.m02726	AC087543	hypothetical protein
9638.m02826	AC068951	expressed protein
9638.m02949	AC078893	putative proteophosphoglycan
9639.m00111	BX000493	hypothetical protein
9638.m03082	AC023240	expressed protein
9638.m03295	AC068924	expressed protein
9638.m03395	AC079029	expressed protein
9638.m03822	AC087599	hypothetical protein
9639.m00368	AC123527	hypothetical protein
9638.m02825	AC068951	expressed protein
9638.m03776	AC084763	hypothetical protein
9639.m00407	AC123526	hypothetical protein
9638.m03046	AC087182	expressed protein
9638.m03645	AC020666	expressed protein
9639.m00678	AC120539	hypothetical protein
9639.m00835	AC146368	expressed protein
9638.m03816	AC087599	expressed protein
9639.m00529	AC133217	hypothetical protein
9639.m00101	BX000493	hypothetical protein
9638.m03356	AC051634	New cDNA-based Gene
9638.m03493	AC113948	expressed protein
9639.m00434	AC120307	hypothetical protein
9638.m03727	AC079874	hypothetical protein
9638.m02729	AC087549	expressed protein
9638.m03413	AC078894	expressed protein
9638.m03254	AC091122	expressed protein
9638.m03360	AC051634	expressed protein
9638.m03571	AC073166	New cDNA-based Gene
9638.m02476	AC073392	hypothetical protein
9638.m02897	AC026815	hypothetical protein
9638.m03083	AC023240	expressed protein
9638.m03198	AC078840	expressed protein
9638.m03263	AC091122	hypothetical protein
9638.m02720	AC087543	transposon protein, putative, CACTA, En/Spm sub-class
9638.m02522	AC087542	hypothetical protein
9638.m02957	AC078829	expressed protein
9638.m02820	AC068951	expressed protein
9638.m02848	AC027038	expressed protein
9638.m03029	AC087182	putative MATH domain containing protein
9638.m03110	AC068950	expressed protein
9638.m03153	AC079888	hypothetical protein
9638.m02741	AC087549	expressed protein
9638.m02723	AC087543	transposon protein, putative, CACTA, En/Spm sub-class
9638.m03835	AC077693	pathogen-related protein Rir1a
9638.m03592	AC051633	expressed protein
9638.m02660	AC025907	expressed protein
9638.m03527	AC092697	expressed protein
9638.m03005	AC051632	expressed protein
9638.m02721	AC087543	transposon protein, putative, CACTA, En/Spm sub-class
9638.m03892	AC018929	hypothetical protein
9638.m02821	AC068951	hypothetical protein
9638.m02970	AC037425	expressed protein
9638.m02715	AC087543	transposon protein, putative, CACTA, En/Spm sub-class
9638.m02746	AC087548	expressed protein
9638.m02843	AC027038	expressed protein
9638.m02543	AC087545	hypothetical protein
9638.m02666	AC025907	expressed protein
9638.m03333	AC025296	expressed protein
9638.m02827	AC068951	hypothetical protein
9638.m02687	AC073393	hypothetical protein
9638.m02349	AC027660	expressed protein
9638.m02226	AC021891	expressed protein
9638.m02236	AC083943	expressed protein
9638.m02776	AC034258	expressed protein
9638.m02717	AC087543	transposon protein, putative, CACTA, En/Spm sub-class
9638.m03069	AC146481	expressed protein
9638.m03072	AC146481	expressed protein
9638.m02704	AC087543	transposon protein, putative, CACTA, En/Spm sub-class
9638.m02800	AC068951	expressed protein
9638.m02968	AC037425	expressed protein
9638.m01856	AC093181	hypothetical protein
9638.m01867	AC093181	expressed protein
9638.m02042	AC124213	Hypothetical protein
9638.m01835	AC092548	expressed protein
9638.m02793	AC068951	putative polypeptide
9638.m02719	AC087543	transposon protein, putative, CACTA, En/Spm sub-class
9638.m02569	AC087546	retrotransposon protein, putative, Ty3-gypsy sub-class
9638.m03235	AC090870	expressed protein
9638.m02745	AC087549	expressed protein
9638.m01913	AC107314	expressed protein
9638.m03339	AC025296	New cDNA-based Gene
9638.m02739	AC087549	expressed protein
9638.m02416	AC027662	expressed protein
9638.m02920	AC069145	hypothetical protein
9638.m02882	AC022457	New cDNA-based Gene
9638.m02523	AC087542	expressed protein
9638.m01701	AC079634	expressed protein
9638.m00974	AC105744	hypothetical protein
9638.m01243	AC092172	expressed protein
9638.m01488	AC090486	F-box domain, putative
9638.m01200	AC099040	putative DNA binding protein
9638.m01945	AC113338	hypothetical protein
9638.m01923	AC134516	hypothetical protein
9638.m01501	AC090486	hypothetical protein
9638.m02074	AC080019	expressed protein
9638.m02179	AC122144	retrotransposon protein, putative, Ty3-gypsy sub-class
9638.m01562	AC119147	hypothetical protein
9638.m01860	AC093181	expressed protein
9638.m01115	AC099042	retrotransposon protein, putative, unclassified
9638.m00267	AC131967	F-box domain, putative
9638.m00310	AC092553	F-box domain, putative
9638.m00610	AC087723	expressed protein
9638.m00797	AC113337	expressed protein
9638.m00849	AC098566	expressed protein
9638.m00915	AC122146	hypothetical protein
9638.m01322	AC113339	hypothetical protein
9638.m03963	AC074283	F-box domain, putative
9638.m01065	AC104322	hypothetical protein
9638.m01055	AC104322	expressed protein
9638.m00464	AC074105	F-box domain, putative
9638.m01187	AC093178	retrotransposon protein, putative, unclassified
9638.m01113	AC099042	hypothetical protein
9638.m01635	AC090483	expressed protein
9638.m01399	AC119149	retrotransposon protein, putative, Ty3-gypsy sub-class
9638.m01278	AC091735	hypothetical protein
9638.m01612	AC090482	retrotransposon protein, putative, Ty3-gypsy sub-class
9638.m01239	AC092387	hypothetical protein
9638.m00793	AC113337	hypothetical protein
9638.m01487	AC090486	F-box domain, putative
9638.m01438	AC131968	expressed protein
9638.m01640	AC090483	expressed protein
9638.m01959	AC079935	expressed protein
9638.m03962	AC074283	F-box domain, putative
9638.m00262	AC131967	hypothetical protein
9638.m00388	AC074283	F-box domain, putative
9638.m00624	AC087723	hypothetical protein
9638.m00370	AC079843	F-box domain, putative
9638.m00466	AC074105	F-box domain, putative
9638.m00412	AC090873	expressed protein
9638.m00952	AC105746	New cDNA-based Gene
9638.m01096	AC093612	hypothetical protein
9638.m00435	AC079852	F-box domain, putative
9638.m00465	AC074105	F-box domain, putative
9637.m03355	AP006171	expressed protein
9638.m00664	AC097447	Hypothetical protein
9638.m01255	AC092172	hypothetical protein
9638.m01760	AC112514	hypothetical protein
9638.m00401	AC099733	AC090873 Hypothetical protein
9638.m00400	AC099733	AC090873 Hypothetical protein
9637.m03074	AP006067	expressed protein
9638.m00748	AC090488	expressed protein
9637.m03288	AP005090	expressed protein
9638.m00174	AC079037	hypothetical protein
9638.m00369	AC079843	F-box domain, putative
9637.m03245	AC137593	expressed protein
9638.m00368	AC079843	F-box domain, putative
9638.m00660	AC097447	expressed protein
9638.m00564	AC097446	retrotransposon protein, putative, Ty3-gypsy sub-class
9638.m00409	AC090873	F-box domain, putative
9638.m00343	AC099734	retrotransposon protein, putative, unclassified
9638.m00902	AC091238	hypothetical protein
9637.m03283	AP005090	expressed protein
9638.m00131	AC079685	expressed protein
9637.m03361	AP006171	expressed protein
9638.m00346	AC099734	F-box domain, putative
9638.m00503	AC084884	expressed protein
9638.m00627	AC116600	expressed protein
9637.m02760	AC108756	expressed protein
9637.m02978	AP005864	expressed protein
9637.m03365	AP006171	expressed protein
9637.m02426	AP005308	hypothetical protein
9637.m02320	AP005833	expressed protein
9637.m02726	AP005677	expressed protein
9637.m02761	AC108756	expressed protein
9637.m03112	AP006149	expressed protein
9637.m03024	AP005682	expressed protein
9637.m01870	AP005556	expressed protein
9637.m01832	AP005702	expressed protein
9637.m02606	AP005399	transposon protein, putative, CACTA, En/Spm sub-class
9637.m02813	AC108757	expressed protein
9637.m02379	AP005419	hypothetical protein
9637.m03367	AP005558	expressed protein
9637.m02750	AC108756	expressed protein
9637.m02734	AP005677	retrotransposon protein, putative, Ty3-gypsy sub-class
9637.m02437	AP005308	expressed protein
9637.m02319	AP005833	expressed protein
9637.m02811	AC099403	expressed protein
9637.m02772	AC108758	hypothetical protein
9637.m02676	AP005759	expressed protein
9637.m02315	AP005565	expressed protein
9637.m02603	AP005399	expressed protein
9637.m02815	AC108757	hypothetical protein
9637.m02226	AP005420	hypothetical protein
9637.m02751	AC108756	expressed protein
9637.m02591	AP005399	expressed protein
9637.m02700	AP005633	expressed protein
9637.m01496	AP005881	F-box domain, putative
9637.m01740	AP005580	expressed protein
9637.m01962	AP005129	hypothetical protein
9637.m02088	AP005707	expressed protein
9637.m00754	AP005739	expressed protein
9637.m01808	AP005637	expressed protein
9637.m01692	AP005675	expressed protein
9637.m01886	AP005728	F-box domain, putative
9637.m02086	AP005707	expressed protein
9637.m02058	AP005753	expressed protein
9637.m01993	AP005577	expressed protein
9637.m02057	AP005753	expressed protein
9637.m01871	AP005556	expressed protein
9637.m01077	AP005971	expressed protein
9637.m01462	AP005704	F-box domain, putative
9637.m01896	AP005728	expressed protein
9637.m01446	AP005091	hypothetical protein
9637.m01345	AP005863	expressed protein
9637.m01120	AP005876	retrotransposon protein, putative, unclassified
9637.m00672	AP005903	expressed protein
9637.m01435	AP005091	hypothetical protein
9637.m01288	AP005593	F-box domain, putative
9637.m01539	AP005400	retrotransposon protein, putative, unclassified
9637.m01839	AP005702	hypothetical protein
9637.m01694	AP005675	expressed protein
9637.m01285	AP005593	F-box domain, putative
9637.m01286	AP005593	expressed protein
9637.m01171	AP005782	expressed protein
9637.m01600	AP005689	expressed protein
9637.m02112	AP005093	expressed protein
9637.m02055	AP005753	retrotransposon protein, putative, unclassified
9637.m01322	AP005811	retrotransposon protein, putative, unclassified
9637.m01722	AP005422	expressed protein
9637.m02053	AP005753	expressed protein
9636.m04082	AP004765	expressed protein
9636.m04392	AP004632	expressed protein
9637.m00985	AP004756	expressed protein
9637.m00708	AP005829	hypothetical protein
9636.m04442	AP003912	expressed protein
9637.m00609	AP005589	expressed protein
9637.m00974	AP004756	expressed protein
9637.m01116	AP005876	expressed protein
9637.m01076	AP005971	expressed protein
9637.m00742	AP006155	expressed protein
9637.m01172	AP005782	expressed protein
9637.m01479	AP005881	expressed protein
9637.m01497	AP005881	F-box domain, putative
9637.m01129	AP005687	expressed protein
9637.m01072	AP005971	expressed protein
9637.m01458	AP005704	AC074283 Hypothetical protein
9637.m01823	AP005702	hypothetical protein
9637.m00687	AP005903	expressed protein
9637.m00669	AP005903	transposon protein, putative, CACTA, En/Spm sub-class
9637.m01361	AP005701	expressed protein
9636.m03734	AP004154	retrotransposon protein, putative, Ty3-gypsy sub-class
9637.m00061	AP005787	expressed protein
9637.m00411	AP005560	expressed protein
9636.m04145	AP005509	expressed protein
9637.m00264	AP005585	expressed protein
9637.m00599	AP005589	expressed protein
9637.m00685	AP005903	expressed protein
9636.m03462	AP004764	expressed protein
9636.m04167	AP003865	expressed protein
9636.m04402	AP004632	expressed protein
9636.m04162	AP003865	AP2 domain, putative
9637.m00202	AP005563	expressed protein
9636.m04303	AP005528	hypothetical protein
9636.m04011	AP005254	hypothetical protein
9637.m00469	AP005729	retrotransposon protein, putative, unclassified
9637.m00633	AP006157	F-box domain, putative
9637.m00262	AP005585	expressed protein
9636.m03450	AP004764	transposon protein, putative, CACTA, En/Spm sub-class
9636.m03315	AP005734	hypothetical protein
9636.m03972	AP003892	expressed protein
9636.m04317	AP005439	expressed protein
9636.m03675	AP004585	expressed protein
9636.m04231	AP004015	expressed protein
9636.m04319	AP005439	expressed protein
9636.m03958	AP003892	expressed protein
9636.m03140	AP004691	hypothetical protein
9636.m04355	AP003948	expressed protein
9636.m04337	AP004592	expressed protein
9636.m04054	AP006049	hypothetical protein
9636.m04097	AP004761	expressed protein
9636.m04121	AP004622	hypothetical protein
9636.m03409	AP005159	expressed protein
9637.m00384	AP005745	hypothetical protein
9636.m03932	AP000364	expressed protein
9636.m04391	AP004632	expressed protein
9636.m02368	AP004652	expressed protein
9636.m03461	AP004764	hypothetical protein
9636.m03994	AP003883	expressed protein
9636.m03347	AP003881	hypothetical protein
9636.m03155	AP004691	expressed protein
9636.m03554	AP004662	retrotransposon protein, putative, unclassified
9636.m03892	AP005148	expressed protein
9636.m03823	AP004376	hypothetical protein
9636.m03973	AP003892	expressed protein
9636.m03628	AP005405	hypothetical protein
9636.m04294	AP005528	hypothetical protein
9636.m03077	AP003947	expressed protein
9636.m02505	AP004645	retrotransposon protein, putative, unclassified
9636.m02597	AP004375	expressed protein
9636.m02632	AP005096	hypothetical protein
9636.m03230	AP005521	expressed protein
9636.m03094	AP005388	hypothetical protein
9636.m02856	AP003962	hypothetical protein
9636.m02668	AP005523	expressed protein
9636.m03273	AP005301	hypothetical protein
9636.m02570	AP005512	expressed protein
9636.m01885	AP005097	hypothetical protein
9636.m00933	AP005416	hypothetical protein
9636.m02035	AP004041	expressed protein
9636.m03042	AP003880	expressed protein
9636.m02867	AP003962	hypothetical protein
9636.m02197	AP005407	retrotransposon protein, putative, Ty3-gypsy sub-class
9636.m01680	AP004650	transposon protein, putative, CACTA, En/Spm sub-class
9636.m01376	AP004705	hypothetical protein
9636.m02252	AP004554	expressed protein
9636.m01853	AP005541	expressed protein
9636.m01347	AP005603	expressed protein
9636.m03233	AP005521	expressed protein
9636.m01980	AP005305	expressed protein
9636.m02584	AP004375	expressed protein
9636.m02684	AP005628	hypothetical protein
9636.m03209	AP004667	expressed protein
9636.m01913	AP004694	retrotransposon protein, putative, Ty3-gypsy sub-class
9636.m01720	AP005731	hypothetical protein
9636.m02034	AP004041	expressed protein
9636.m01460	AP004690	hypothetical protein
9636.m01609	AP005095	expressed protein
9636.m01330	AP004559	hypothetical protein
9636.m00757	AP003878	expressed protein
9636.m01331	AP004559	hypothetical protein
9636.m00994	AP003858	expressed protein
9636.m02063	AP005540	retrotransposon protein, putative, unclassified
9636.m01640	AP005697	expressed protein
9636.m01704	AP005731	expressed protein
9636.m01979	AP005305	expressed protein
9636.m02723	AP005817	hypothetical protein
9636.m01236	AP003877	hypothetical protein
9636.m01679	AP004650	expressed protein
9636.m01935	AP005390	expressed protein
9636.m01395	AP003907	expressed protein
9636.m01692	AP004650	expressed protein
9636.m01224	AP003877	expressed protein
9636.m00642	AP004560	expressed protein
9636.m01314	AP005410	retrotransposon protein, putative, Ty1-copia sub-class
9636.m00787	AP005440	expressed protein
9636.m00932	AP005416	expressed protein
9636.m01023	AP003875	expressed protein
9636.m01204	AP005870	retrotransposon protein, putative, Ty3-gypsy sub-class
9636.m00941	AP005416	expressed protein
9636.m01705	AP005731	hypothetical protein
9636.m00746	AP004619	expressed protein
9636.m01010	AP004565	expressed protein
9636.m00554	AP004698	expressed protein
9635.m04942	AP003816	transposon protein, putative, CACTA, En/Spm sub-class
9635.m04927	AP003818	VQ motif, putative
9636.m00563	AP004698	retrotransposon protein, putative, Ty3-gypsy sub-class
9636.m00400	AP005542	expressed protein
9636.m00818	AP004568	expressed protein
9636.m00606	AP005847	expressed protein
9636.m00366	AP003876	expressed protein
9636.m00812	AP004646	transposon protein, putative, unclassified
9636.m01690	AP004650	expressed protein
9636.m01570	AP005157	expressed protein
9636.m00391	AP005542	expressed protein
9635.m04943	AP003816	transposon protein, putative, CACTA, En/Spm sub-class
9636.m01124	AP005488	expressed protein
9636.m00254	AP003886	expressed protein
9636.m00597	AP005847	expressed protein
9636.m01186	AP005870	expressed protein
9635.m04418	AP004339	expressed protein
9635.m03997	AP005149	expressed protein
9635.m04908	AP003818	hypothetical protein
9636.m00527	AP004460	expressed protein
9635.m04790	AP004300	hypothetical protein
9636.m00119	AP005657	expressed protein
9635.m04962	AP004316	hypothetical protein
9636.m00171	AP003925	hypothetical protein
9636.m00819	AP004568	expressed protein
9635.m04941	AP003816	transposon protein, putative, CACTA, En/Spm sub-class
9635.m04897	AP005167	hypothetical protein
9636.m00701	AP005164	expressed protein
9636.m00241	AP003886	F-box domain, putative
9635.m04769	AP004570	hypothetical protein
9635.m03694	AP005195	expressed protein
9635.m04255	AP004988	hypothetical protein
9635.m04007	AP003750	transposon protein, putative, CACTA, En/Spm sub-class
9635.m04088	AP003840	retrotransposon protein, putative, Ty3-gypsy sub-class
9635.m04281	AP004309	EF hand, putative
9636.m00189	AP005730	expressed protein
9636.m00603	AP005847	expressed protein
9635.m03912	AP004276	expressed protein
9635.m03656	AP005125	F-box domain, putative
9635.m04740	AP004274	expressed protein
9635.m04084	AP003840	expressed protein
9635.m04040	AP003846	expressed protein
9635.m04918	AP003818	VQ motif, putative
9635.m03859	AP003845	expressed protein
9635.m04391	AP004339	expressed protein
9635.m04544	AP003822	hypothetical protein
9635.m03976	AP003985	expressed protein
9636.m00117	AP005657	expressed protein
9635.m04081	AP003840	expressed protein
9635.m03651	AP004261	expressed protein
9635.m03315	AP003850	expressed protein
9635.m04532	AP005455	hypothetical protein
9635.m03898	AP004276	expressed protein
9635.m03897	AP004182	expressed protein
9635.m03794	AP003981	expressed protein
9635.m03795	AP003981	expressed protein
9635.m03961	AP003803	expressed protein
9635.m03276	AP005103	expressed protein
9635.m04016	AP003750	expressed protein
9635.m04354	AP004009	expressed protein
9635.m03679	AP005195	expressed protein
9635.m04089	AP003840	expressed protein
9635.m04390	AP004339	expressed protein
9635.m04737	AP004274	expressed protein
9635.m03905	AP004276	expressed protein
9635.m03654	AP005125	F-box domain, putative
9635.m04143	AP005175	expressed protein
9635.m04540	AP005455	hypothetical protein
9635.m04061	AP004275	hypothetical protein
9635.m03288	AP005103	F-box domain, putative
9635.m03239	AP005176	expressed protein
9635.m03655	AP005125	F-box domain, putative
9635.m04083	AP003840	expressed protein
9635.m04085	AP003840	expressed protein
9635.m03556	AP005156	hypothetical protein
9635.m03068	AP003956	expressed protein
9635.m02589	AP005737	hypothetical protein
9635.m03314	AP003850	expressed protein
9635.m03841	AP003845	expressed protein
9635.m03036	AP004266	hypothetical protein
9635.m03579	AP003960	expressed protein
9635.m03832	AP003845	expressed protein
9635.m04852	AP003757	expressed protein
9635.m04087	AP003840	expressed protein
9635.m02820	AP004347	expressed protein
9635.m02802	AP003806	expressed protein
9635.m02493	AP005447	retrotransposon protein, putative, Ty3-gypsy sub-class
9635.m02840	AP005181	expressed protein
9635.m03706	AP004270	expressed protein
9635.m03384	AP005169	expressed protein
9635.m03105	AP005177	expressed protein
9635.m03101	AP005177	retrotransposon protein, putative, unclassified
9635.m00991	AP005171	expressed protein
9635.m01236	AP005764	hypothetical protein
9635.m01632	AP006465	expressed protein
9635.m02375	AP003830	expressed protein
9635.m01626	AP006447	hypothetical protein
9635.m01630	AP006465	expressed protein
9635.m02187	AP005247	expressed protein
9635.m02288	AP005831	retrotransposon protein, putative, Ty3-gypsy sub-class
9635.m02642	AP005641	hypothetical protein
9635.m03583	AP003960	expressed protein
9635.m01297	AP004303	expressed protein
9635.m02818	AP004347	hypothetical protein
9635.m02398	AP006052	expressed protein
9635.m03213	AP005185	transposon protein, putative, CACTA, En/Spm sub-class
9635.m03252	AP005176	expressed protein
9635.m02279	AP005831	F-box domain, putative
9635.m02508	AP006159	expressed protein
9635.m02895	AP004299	hypothetical protein
9635.m01366	AP004382	F-box domain, putative
9635.m01536	AP004176	expressed protein
9635.m01972	AP005830	expressed protein
9635.m02269	AP004349	hypothetical protein
9635.m02320	AP004298	hypothetical protein
9635.m02477	AP005451	transposon protein, putative, CACTA, En/Spm sub-class
9635.m02252	AP003745	transposon protein, putative, CACTA, En/Spm sub-class
9635.m01326	AP005194	expressed protein
9635.m01319	AP005194	expressed protein
9635.m01480	AP005824	hypothetical protein
9635.m02254	AP003745	transposon protein, putative, CACTA, En/Spm sub-class
9635.m02826	AP005181	hypothetical protein
9635.m03599	AP004401	expressed protein
9635.m01334	AP005194	hypothetical protein
9635.m01123	AP004002	hypothetical protein
9635.m00926	AP003848	hypothetical protein
9635.m01766	AP005475	expressed protein
9635.m01910	AP004398	expressed protein
9635.m02134	AP004305	retrotransposon protein, putative, Ty3-gypsy sub-class
9635.m01941	AP004346	hypothetical protein
9635.m00439	AP003824	expressed protein
9635.m01059	AP003748	hypothetical protein
9635.m01313	AP005194	expressed protein
9635.m00699	AP005840	expressed protein
9635.m01546	AP003755	expressed protein
9635.m01821	AP005260	expressed protein
9635.m00657	AP004267	expressed protein
9635.m00943	AP004379	hypothetical protein
9635.m00951	AP005257	F-box protein interaction domain, putative
9635.m00823	AP003861	expressed protein
9635.m00646	AP004267	expressed protein
9635.m01186	AP005197	expressed protein
9635.m00546	AP005409	hypothetical protein
9635.m00213	AP004262	hypothetical protein
9635.m00890	AP005173	expressed protein
9634.m04663	AP003770	expressed protein
9635.m00465	AP005473	hypothetical protein
9634.m04864	AP004329	expressed protein
9634.m04632	AP003935	expressed protein
9635.m00212	AP004262	hypothetical protein
9635.m01235	AP005764	F-box domain, putative
9635.m00976	AP005259	expressed protein
9635.m00389	AP004314	Zinc finger C-x8-C-x5-C-x3-H type (and similar), putative
9635.m00434	AP003824	hypothetical protein
9635.m00149	AP005486	expressed protein
9635.m00461	AP005473	expressed protein
9635.m01217	AP005516	expressed protein
9635.m00957	AP005257	retrotransposon protein, putative, Ty3-gypsy sub-class
9635.m00820	AP003861	expressed protein
9635.m01463	AP005178	expressed protein
9635.m00645	AP004267	hypothetical protein
9635.m00790	AP003800	hypothetical protein
9634.m04156	AP003573	expressed protein
9634.m04848	AP003634	expressed protein
9635.m00104	AP003746	expressed protein
9635.m00545	AP005409	hypothetical protein
9635.m00032	AP005187	expressed protein
9635.m00198	AP004262	F-box domain, putative
9635.m00672	AP003842	expressed protein
9635.m01233	AP005764	expressed protein
9635.m00010	AP005869	expressed protein
9635.m00219	AP005165	F-box domain, putative
9635.m00822	AP003861	hypothetical protein
9635.m00152	AP005486	expressed protein
9635.m00220	AP005165	F-box domain, putative
9635.m00426	AP004010	hypothetical protein
9635.m00700	AP005840	hypothetical protein
9635.m00228	AP003702	expressed protein
9635.m00871	AP005179	hypothetical protein
9635.m00200	AP004262	F-box domain, putative
9634.m04355	AP005760	expressed protein
9634.m04368	AP005769	expressed protein
9634.m04102	AP004792	hypothetical protein
9634.m04329	AP003712	hypothetical protein
9634.m04662	AP003770	expressed protein
9634.m04378	AP005769	hypothetical protein
9634.m04210	AP003523	retrotransposon protein, putative, Ty3-gypsy sub-class
9635.m00578	AP005454	hypothetical protein
9634.m04849	AP003634	expressed protein
9634.m04286	AP003565	expressed protein
9635.m00093	AP003759	expressed protein
9635.m00099	AP003746	expressed protein
9635.m00103	AP003746	hypothetical protein
9635.m00231	AP003702	Similar to phytosulfokines 4 precursor [contains: phytosulfokine-alpha (psk-alpha) (phytosulfokine-a); phytosulfokine-beta (psk-beta)(phytosulfokine-b)]
9634.m03992	AP003609	expressed protein
9634.m04846	AP003634	expressed protein
9634.m04940	AP003624	expressed protein
9634.m03916	AP003616	expressed protein
9634.m04243	AP004008	expressed protein
9634.m04601	AP005395	hypothetical protein
9634.m04759	AP003726	expressed protein
9634.m04865	AP004329	expressed protein
9634.m04234	AP003568	expressed protein
9634.m04791	AP003761	expressed protein
9634.m04522	AP003728	expressed protein
9635.m00208	AP004262	expressed protein
9635.m00186	AP004262	expressed protein
9635.m00092	AP003759	hypothetical protein
9635.m00376	AP004314	expressed protein
9635.m00362	AP004338	hypothetical protein
9635.m00849	AP004384	hypothetical protein
9634.m04255	AP003517	expressed protein
9634.m03921	AP003616	hypothetical protein
9634.m04287	AP003565	retrotransposon protein, putative, Ty3-gypsy sub-class
9634.m03397	AP003686	hypothetical protein
9634.m03857	AP003629	expressed protein
9634.m04002	AP003609	expressed protein
9634.m03735	AP003622	expressed protein
9634.m04354	AP005760	F-box domain, putative
9635.m00142	AP005486	expressed protein
9634.m04342	AP004803	expressed protein
9634.m03736	AP003617	hypothetical protein
9634.m04519	AP004989	expressed protein
9634.m04935	AP003769	expressed protein
9634.m04847	AP003634	expressed protein
9634.m04574	AP003766	expressed protein
9634.m03974	AP004615	hypothetical protein
9634.m03971	AP004615	expressed protein
9634.m02931	AP003620	hypothetical protein
9634.m04127	AP004792	expressed protein
9634.m03658	AP003630	expressed protein
9634.m04118	AP004792	phytosulfokines 1 precursor [contains: phytosulfokine-alpha (psk-alpha) (phytosulfokine-a); phytosulfokine-beta (psk-beta)(phytosulfokine-b)]
9634.m03265	AP004818	hypothetical protein
9634.m02971	AP003951	hypothetical protein
9634.m04119	AP004792	phytosulfokines 1 precursor [contains: phytosulfokine-alpha (psk-alpha) (phytosulfokine-a); phytosulfokine-beta (psk-beta)(phytosulfokine-b)]
9634.m02908	AP004688	expressed protein
9634.m03966	AP004781	expressed protein
9634.m03898	AP004279	hypothetical protein
9634.m01974	AP006054	expressed protein
9634.m03182	AP005450	hypothetical protein
9634.m03955	AP003711	expressed protein
9634.m03595	AP005461	expressed protein
9634.m03191	AP005450	hypothetical protein
9634.m03628	AP005658	expressed protein
9634.m02144	AP004750	expressed protein
9634.m03289	AP004818	hypothetical protein
9634.m02911	AP004688	expressed protein
9634.m02146	AP004750	expressed protein
9634.m01731	AP006050	retrotransposon protein, putative, unclassified
9634.m01394	AP004651	expressed protein
9634.m02752	AP004681	hypothetical protein
9634.m02285	AP003952	hypothetical protein
9634.m02301	AP003506	expressed protein
9634.m03627	AP005658	hypothetical protein
9634.m02266	AP005449	hypothetical protein
9634.m02063	AP005968	expressed protein
9634.m02434	AP004992	expressed protein
9634.m02932	AP003620	hypothetical protein
9634.m02124	AP003511	expressed protein
9634.m02191	AP004811	expressed protein
9634.m02391	AP005688	expressed protein
9634.m02899	AP004688	retrotransposon protein, putative, Ty3-gypsy sub-class
9634.m01248	AP005522	hypothetical protein
9634.m02081	AP003507	expressed protein
9634.m02291	AP003952	hypothetical protein
9634.m02079	AP005968	expressed protein
9634.m02077	AP005968	expressed protein
9634.m02245	AP004784	hypothetical protein
9634.m01546	AP005382	expressed protein
9634.m01912	AP004007	expressed protein
9634.m02802	AP005656	hypothetical protein
9634.m02349	AP005646	expressed protein
9634.m02528	AP004802	hypothetical protein
9634.m03056	AP005468	hypothetical protein
9634.m01759	AP004791	expressed protein
9634.m01913	AP004007	expressed protein
9634.m02195	AP004325	expressed protein
9634.m01681	AP003540	hypothetical protein
9634.m01397	AP004651	F-box domain, putative
9634.m00854	AP005913	Zinc knuckle, putative
9634.m01937	AP006166	expressed protein
9634.m00346	AP004234	expressed protein
9634.m01490	AP004740	expressed protein
9634.m01192	AP003513	hypothetical protein
9634.m01260	AP004785	hypothetical protein
9634.m02156	AP004757	expressed protein
9634.m00985	AP003946	expressed protein
9634.m00975	AP005906	expressed protein
9634.m00586	AB026295	expressed protein
9634.m00475	AP003767	expressed protein
9634.m00362	AP004234	expressed protein
9634.m00509	AP004806	retrotransposon protein, putative, unclassified
9634.m00133	AP001389	expressed protein
9634.m00470	AP003767	expressed protein
9634.m00894	AP003514	transposon protein, putative, CACTA, En/Spm sub-class
9634.m00986	AP003946	hypothetical protein
9634.m01975	AP006054	expressed protein
9634.m00797	AP004552	expressed protein
9634.m01124	AP005425	expressed protein
9634.m01585	AP003575	hypothetical protein
9634.m00361	AP004234	expressed protein
9634.m00347	AP004234	expressed protein
9634.m00464	AP003767	expressed protein
9634.m00917	AP003510	expressed protein
9634.m01244	AP005522	expressed protein
9634.m01794	AP006053	retrotransposon protein, putative, unclassified
9634.m01876	AP005413	expressed protein
9634.m00954	AP005906	transposon protein, putative, CACTA, En/Spm sub-class
9634.m00757	AP003019	expressed protein
9634.m01451	AP005619	hypothetical protein
9634.m02198	AP004325	expressed protein
9634.m00987	AP004991	expressed protein
9633.m04552	AC113333	expressed protein
9634.m00597	AB026295	expressed protein
9633.m04750	AC120988	expressed protein
9633.m04736	AC120988	expressed protein
9633.m04742	AC120988	hypothetical protein
9634.m00212	AP003457	expressed protein
9634.m00679	AP002071	expressed protein
9634.m00548	AP006533	expressed protein
9633.m04846	AC136216	hypothetical protein
9634.m00463	AP003767	expressed protein
9634.m00984	AP003946	expressed protein
9634.m00227	AP003456	expressed protein
9634.m00169	AP002837	hypothetical protein
9634.m01150	AP003488	expressed protein
9634.m01025	AP004754	expressed protein
9634.m00349	AP004234	expressed protein
9634.m00850	AP005913	expressed protein
9634.m00327	AP000559	expressed protein
9634.m00544	AP006533	hypothetical protein
9634.m00467	AP003767	expressed protein
9633.m04905	AC137000	expressed protein
9634.m00465	AP003767	expressed protein
9634.m00571	AP005828	expressed protein
9634.m00225	AP003456	hypothetical protein
9634.m00851	AP005913	expressed protein
9634.m00498	AP004806	expressed protein
9633.m04148	AC130611	expressed protein
9634.m00391	AP003708	expressed protein
9633.m03662	AC121364	hypothetical protein
9633.m03276	AC135419	expressed protein
9633.m04479	AC093956	expressed protein
9634.m00339	AP002542	hypothetical protein
9634.m00200	AP003564	expressed protein
9634.m00191	AP003564	expressed protein
9634.m00222	AP003456	expressed protein
9634.m00973	AP005906	expressed protein
9634.m00134	AP001389	F-box domain, putative
9633.m04085	AC132485	expressed protein
9634.m00053	AP001129	retrotransposon protein, putative, Ty3-gypsy sub-class
9634.m00149	AP001389	expressed protein
9634.m00219	AP003456	expressed protein
9633.m04405	AC104278	expressed protein
9634.m00244	AP003456	expressed protein
9633.m04419	AC136492	hypothetical protein
9634.m00143	AP001389	expressed protein
9633.m04181	AC118284	expressed protein
9633.m03928	AC130605	expressed protein
9633.m03645	AC112159	expressed protein
9633.m04274	AC121365	hypothetical protein
9633.m04079	AC130604	expressed protein
9633.m03788	AC118289	expressed protein
9633.m04392	AC098833	hypothetical protein
9633.m04659	AC104284	expressed protein
9633.m04561	AC113333	expressed protein
9633.m04747	AC120988	expressed protein
9633.m04264	AC121365	expressed protein
9633.m03728	AC144737	hypothetical protein
9634.m00345	AP004234	hypothetical protein
9633.m04319	AC119291	F-box domain, putative
9633.m04349	AC104713	F-box domain, putative
9633.m04410	AC104278	expressed protein
9633.m04562	AC113333	expressed protein
9633.m04583	AC124143	hypothetical protein
9633.m04563	AC113333	hypothetical protein
9633.m04642	AC120990	hypothetical protein
9633.m04404	AC104278	expressed protein
9633.m04497	AC104709	expressed protein
9633.m04351	AC104713	expressed protein
9633.m03561	AC105770	hypothetical protein
9633.m04361	AC104713	expressed protein
9633.m03795	AC118289	expressed protein
9633.m03930	AC130605	hypothetical protein
9633.m03638	AC121361	expressed protein
9633.m02793	AC104707	hypothetical protein
9633.m03218	AC137623	expressed protein
9633.m02771	AC104279	hypothetical protein
9633.m04122	AC130603	expressed protein
9633.m04374	AC098833	Plant invertase/pectin methylesterase inhibitor, putative
9633.m03354	AC119292	hypothetical protein
9633.m03641	AC108503	expressed protein
9633.m03747	AC144737	expressed protein
9633.m04027	AC130601	expressed protein
9633.m04107	AC130603	expressed protein
9633.m03157	AC130729	expressed protein
9633.m03827	AC097175	expressed protein
9633.m04486	AC093956	hypothetical protein
9633.m03394	AC134930	expressed protein
9633.m03372	AC105318	expressed protein
9633.m04472	AC129717	expressed protein
9633.m04183	AC144740	expressed protein
9633.m04275	AC121365	expressed protein
9633.m04313	AC097112	F-box domain, putative
9633.m02531	AC135424	expressed protein
9633.m03647	AC112159	expressed protein
9633.m02873	AC136218	expressed protein
9633.m02907	AC108501	expressed protein
9633.m03095	AC104708	expressed protein
9633.m03198	AC134933	hypothetical protein
9633.m04114	AC130603	expressed protein
9633.m03923	AC130605	expressed protein
9633.m02576	AC144742	expressed protein
9633.m03108	AC105319	hypothetical protein
9633.m04250	AC111015	expressed protein
9633.m03824	AC093952	expressed protein
9633.m03197	AC134933	expressed protein
9633.m03876	AC129718	expressed protein
9633.m03207	AC134933	expressed protein
9633.m03591	AC117265	expressed protein
9633.m03825	AC093952	expressed protein
9633.m02946	AC136219	expressed protein
9633.m02046	AC135915	expressed protein
9633.m02520	AC135417	expressed protein
9633.m03320	AC108502	retrotransposon protein, putative, Ty3-gypsy sub-class
9633.m03029	AC134932	hypothetical protein
9633.m02051	AC135915	hypothetical protein
9633.m02759	AC137618	expressed protein
9633.m02337	AC134346	expressed protein
9633.m02419	AC105320	expressed protein
9633.m03619	AC121361	expressed protein
9633.m03751	AC144737	hypothetical protein
9633.m02814	AC119289	expressed protein
9633.m02676	AC136999	expressed protein
9633.m02367	AC137748	expressed protein
9633.m02073	AC093955	expressed protein
9633.m02074	AC093955	hypothetical protein
9633.m01568	AC145272	retrotransposon protein, putative, unclassified
9633.m02078	AC093955	expressed protein
9633.m02304	AC136224	F-box domain, putative
9633.m02634	AC121363	hypothetical protein
9633.m02459	AC134342	hypothetical protein
9633.m02790	AC104707	expressed protein
9633.m02758	AC137618	expressed protein
9633.m02232	AC104271	expressed protein
9633.m02501	AC104706	hypothetical protein
9633.m02770	AC104279	expressed protein
9633.m02566	AC134928	expressed protein
9633.m03028	AC134932	expressed protein
9633.m03492	AC130602	hypothetical protein
9633.m04028	AC130601	hypothetical protein
9633.m00441	AC104277	expressed protein
9633.m00586	AC087425	expressed protein
9633.m01133	AC108498	expressed protein
9633.m02223	AC136225	hypothetical protein
9633.m01781	AC145273	expressed protein
9633.m00805	AC135431	expressed protein
9633.m01405	AC104270	retrotransposon protein, putative, Ty3-gypsy sub-class
9633.m01201	AC104275	hypothetical protein
9633.m01727	AC137002	expressed protein
9633.m00806	AC135431	expressed protein
9633.m01095	AC136226	expressed protein
9633.m01220	AC132487	expressed protein
9633.m00191	AP001111	expressed protein
9633.m00673	AC144741	expressed protein
9633.m00910	AC130730	expressed protein
9633.m01207	AC104275	transposon protein, putative, CACTA, En/Spm sub-class
9633.m00396	AC093490	expressed protein
9633.m00576	AC087425	hypothetical protein
9633.m01103	AC136226	expressed protein
9633.m00740	AC135426	hypothetical protein
9633.m01135	AC137001	hypothetical protein
9633.m00727	AC136228	expressed protein
9633.m00808	AC135431	hypothetical protein
9633.m00823	AC135431	expressed protein
9633.m00930	AC132486	expressed protein
9633.m01026	AC135918	expressed protein
9633.m01152	AC146716	expressed protein
9633.m01545	AC132484	retrotransposon protein, putative, unclassified
9633.m01197	AC104275	expressed protein
9633.m00144	AC093921	expressed protein
9633.m00123	AC079356	Similar to metallothionein-like protein type 2
9633.m00473	AC124142	expressed protein
9633.m00301	AC130598	expressed protein
9633.m00494	AC016779	hypothetical protein
9633.m01007	AC135920	expressed protein
9633.m00442	AC104277	expressed protein
9633.m01052	AC130599	expressed protein
9633.m00384	AC093490	hypothetical protein
9633.m01350	AC137606	expressed protein
9633.m00943	AC135427	expressed protein
9633.m00434	AC104277	expressed protein
9633.m00439	AC104277	expressed protein
9633.m00919	AC130730	expressed protein
9632.m05157	AL606660	expressed protein
9632.m05756	AL606651	expressed protein
9632.m05463	AL606446	expressed protein
9633.m00435	AC104277	expressed protein
9632.m05242	AL606650	hypothetical protein
9632.m05670	AL606668	hypothetical protein
9633.m01250	AC145396	expressed protein
9633.m00409	AC137616	retrotransposon protein, putative, Ty1-copia sub-class
9633.m00214	AP001111	expressed protein
9632.m05775	AL606686	DnaJ domain, putative
9633.m00325	AC079357	expressed protein
9633.m00199	AP001111	hypothetical protein
9632.m05413	AL606692	expressed protein
9633.m00145	AC093921	expressed protein
9632.m05523	AL606999	expressed protein
9633.m00141	AC093921	hypothetical protein
9633.m00794	AC135425	expressed protein
9633.m00588	AC119288	expressed protein
9633.m00243	AC079021	expressed protein
9632.m05412	AL606692	expressed protein
9632.m05126	AL662970	hypothetical protein
9632.m05401	AL606635	expressed protein
9632.m05456	AL606446	retrotransposon protein, putative, Ty3-gypsy sub-class
9632.m04480	AL663000	expressed protein
9632.m05677	AL606668	expressed protein
9632.m05138	AL606660	expressed protein
9632.m04722	AL606639	expressed protein
9632.m04606	AL606628	expressed protein
9632.m05643	AL606457	expressed protein
9632.m05480	AL606685	F-box domain, putative
9632.m05581	AL606619	Heavy-metal-associated domain, putative
9633.m00190	AP001111	expressed protein
9633.m00471	AC124142	hypothetical protein
9632.m04670	AL607001	expressed protein
9632.m05036	AL606684	zinc finger domain, LSD1 subclass, putative
9632.m05267	AL606444	hypothetical protein
9632.m05080	AL662950	hypothetical protein
9632.m05188	AL606669	expressed protein
9632.m04186	AL731616	expressed protein
9632.m04737	AL606624	Similar to protein kinase, putative
9632.m05266	AL606444	expressed protein
9632.m05589	AL606619	expressed protein
9632.m04967	AL606638	Zinc finger, C3HC4 type (RING finger), putative
9632.m05102	AL606648	hypothetical protein
9632.m05050	AL606684	expressed protein
9632.m04334	AL663006	expressed protein
9632.m05198	AL606669	expressed protein
9632.m05590	AL606619	expressed protein
9632.m03398	AL606458	retrotransposon protein, putative, unclassified
9632.m03230	AL662947	expressed protein
9632.m04284	AL662976	expressed protein
9632.m03518	AL606448	expressed protein
9632.m04371	AL606459	expressed protein
9632.m04154	AL606622	hypothetical protein
9632.m04217	AL662958	retrotransposon protein, putative, unclassified
9632.m04624	AL662954	expressed protein
9632.m05189	AL606669	expressed protein
9632.m04724	AL606639	expressed protein
9632.m04528	AL606647	expressed protein
9632.m04301	AL662976	expressed protein
9632.m04197	AL731616	hypothetical protein
9632.m04549	AL606682	expressed protein
9632.m04828	AL662957	pectinesterase inhibitor domain
9632.m03891	AL606998	F-box domain, putative
9632.m04721	AL606639	expressed protein
9632.m05113	AL606648	expressed protein
9632.m05051	AL606684	expressed protein
9632.m04440	AL606728	expressed protein
9632.m04350	AL662998	expressed protein
9632.m03639	AL606636	expressed protein
9632.m03713	AL606588	expressed protein
9632.m03320	AL731628	hypothetical protein
9632.m03612	AL731584	hypothetical protein
9632.m04230	AL662958	expressed protein
9632.m03490	AL731606	expressed protein
9632.m03552	AL606615	expressed protein
9632.m03427	AL606592	expressed protein
9632.m02934	AL731623	expressed protein
9632.m04202	AL731616	hypothetical protein
9632.m04468	AL731613	expressed protein
9632.m03323	AL731628	hypothetical protein
9632.m04605	AL606628	expressed protein
9632.m05289	AL606657	expressed protein
9632.m04421	AL606695	expressed protein
9632.m03706	AL606653	expressed protein
9632.m03136	AL731642	expressed protein
9632.m02960	AL607000	expressed protein
9632.m02993	AL731619	expressed protein
9632.m03281	AL606618	transposon protein, putative, CACTA, En/Spm sub-class
9632.m03317	AL662944	expressed protein
9632.m02999	AL731619	expressed protein
9632.m03511	AL731593	expressed protein
9632.m02988	AL662977	expressed protein
9632.m03365	AL606632	expressed protein
9632.m03705	AL606653	expressed protein
9632.m03627	AL606636	hypothetical protein
9632.m02944	AL731623	hypothetical protein
9632.m03565	AL606615	expressed protein
9632.m03155	AL607005	expressed protein
9632.m02495	BX569684	expressed protein
9632.m02791	AL662983	retrotransposon protein, putative, unclassified
9632.m03280	AL606618	transposon protein, putative, CACTA, En/Spm sub-class
9632.m02681	AL731624	expressed protein
9632.m03002	AL731619	expressed protein
9632.m02972	AL662977	expressed protein
9632.m02646	AL662963	expressed protein
9632.m03134	AL731642	expressed protein
9632.m02616	AL606995	expressed protein
9632.m02555	AL606625	expressed protein
9632.m03137	AL731642	expressed protein
9632.m03166	AL607005	hypothetical protein
9632.m02611	AL606995	expressed protein
9632.m01985	AL662955	PB1 domain, putative
9632.m02963	AL607000	expressed protein
9632.m03356	AL606632	expressed protein
9632.m03336	AL731590	hypothetical protein
9632.m03122	AL731642	expressed protein
9632.m02726	AL662956	expressed protein
9632.m02096	AL663015	expressed protein
9632.m03014	AL731601	hypothetical protein
9632.m01844	AL663014	hypothetical protein
9632.m01605	AL663002	hypothetical protein
9632.m02444	AL731634	hypothetical protein
9632.m02101	AL663015	expressed protein
9632.m03124	AL731642	retrotransposon protein, putative, unclassified
9632.m02464	AL731608	F-box domain, putative
9632.m02977	AL662977	retrotransposon protein, putative, unclassified
9632.m02164	AL662966	expressed protein
9632.m01882	AL663008	hypothetical protein
9632.m01761	AL663012	retrotransposon protein, putative, unclassified
9632.m02055	AL731633	expressed protein
9632.m01353	AL606634	hypothetical protein
9632.m02318	AL663007	expressed protein
9632.m01152	AL606590	retrotransposon protein, putative, unclassified
9632.m01118	AL606449	hypothetical protein
9632.m01703	AL731604	hypothetical protein
9632.m01819	AL731637	expressed protein
9632.m00779	AL663013	hypothetical protein
9632.m02353	AL606599	F-box domain, putative
9632.m02056	AL731633	expressed protein
9632.m02146	AL731622	expressed protein
9632.m00818	AL731589	retrotransposon protein, putative, Ty3-gypsy sub-class
9632.m00979	AL663018	expressed protein
9632.m00824	AL731589	expressed protein
9632.m00565	AL731640	expressed protein
9632.m00757	AL662959	expressed protein
9632.m00799	AL662990	expressed protein
9632.m00887	AL662936	expressed protein
9632.m00977	AL663018	expressed protein
9632.m01376	AL731592	hypothetical protein
9632.m00731	AL606603	hypothetical protein
9632.m01698	AL663009	F-box domain, putative
9632.m00894	AL662934	expressed protein
9632.m00223	AL606609	expressed protein
9632.m00161	AL606631	expressed protein
9632.m01014	AL606997	expressed protein
9632.m00163	AL606631	expressed protein
9632.m00117	AL606616	hypothetical protein
9632.m01072	AL607008	expressed protein
9632.m01263	AL731643	retrotransposon protein, putative, unclassified
9632.m01049	AL662965	hypothetical protein
9632.m00111	AL606616	hypothetical protein
9632.m00528	AL662941	retrotransposon protein, putative, Ty3-gypsy sub-class
9632.m00052	AL662935	expressed protein
9631.m05584	AC084320	New cDNA-based Gene
9632.m00259	AL606689	expressed protein
9632.m01015	AL606997	expressed protein
9631.m05846	AC135958	expressed protein
9631.m06346	AC096690	hypothetical protein
9632.m00548	AL731640	hypothetical protein
9631.m05764	AC104321	expressed protein
9632.m00299	BX842608	hypothetical protein
9631.m05828	AC135958	expressed protein
9631.m06151	AC104487	expressed protein
9632.m01211	AL663001	hypothetical protein
9632.m00429	AL731603	retrotransposon protein, putative, unclassified
9632.m01221	AL662982	expressed protein
9631.m05021	AC146936	hypothetical protein
9631.m05380	AC084282	expressed protein
9631.m05753	AC104321	expressed protein
9631.m06029	AC091247	expressed protein
9631.m05559	AC084748	New cDNA-based Gene
9631.m06289	AC096688	expressed protein
9631.m06019	AC091247	expressed protein
9631.m06076	AC133778	expressed protein
9631.m06028	AC091247	expressed protein
9631.m05542	AC091494	hypothetical protein
9631.m06058	AC133778	expressed protein
9631.m05324	AC135225	expressed protein
9631.m05781	AC108906	unknow protein
9631.m06111	AC092557	expressed protein
9631.m06219	AC099324	expressed protein
9631.m05772	AC104321	expressed protein
9631.m05653	AC087096	New cDNA-based Gene
9631.m06355	AC096690	expressed protein
9631.m05654	AC087096	New cDNA-based Gene
9631.m06078	AC133778	expressed protein
9631.m05123	AC096689	expressed protein
9631.m04919	AC082645	expressed protein
9631.m05309	AC092556	expressed protein
9631.m05488	AC092781	expressed protein
9631.m04420	AC135600	expressed protein
9631.m05510	AC091494	known protein
9631.m05669	AC090871	expressed protein
9631.m05030	AC137997	hypothetical protein
9631.m06220	AC099324	expressed protein
9631.m05445	AC099043	expressed protein
9631.m05648	AC087096	expressed protein
9631.m05577	AC084320	expressed protein
9631.m05285	AC091811	circumsporozoite protein-like protein
9632.m00110	AL606616	hypothetical protein
9631.m05807	AC135563	expressed protein
9631.m05790	AC108906	unknow protein
9631.m05444	AC099043	expressed protein
9631.m05580	AC084320	New cDNA-based Gene
9631.m05717	AC092076	F-box domain, putative
9631.m04918	AC082645	putative DNA-binding protein
9631.m05768	AC104321	expressed protein
9631.m04590	AC079830	expressed protein
9631.m05028	AC137997	expressed protein (having alternative splicing products)
9631.m05059	AC135956	hypothetical protein
9631.m05365	AC079887	expressed protein
9631.m05406	AC090713	expressed protein
9631.m04886	AC087797	expressed protein
9631.m04693	AC092779	expressed protein
9631.m05487	AC092781	expressed protein
9631.m05027	AC137997	expressed protein (having alternative splicing products)
9631.m05124	AC096689	hypothetical protein
9631.m04842	AC133334	expressed protein
9631.m05409	AC090713	hypothetical protein
9631.m05494	AC092781	expressed protein
9631.m05297	AC092556	expressed protein
9631.m05585	AC084320	expressed protein
9631.m04803	AC097368	expressed protein
9631.m04249	AC147427	hypothetical protein
9631.m04121	AC091246	expressed protein
9631.m04149	AC146816	expressed protein
9631.m04100	AC092780	expressed protein
9631.m03643	AC146468	expressed protein
9631.m03770	AC135502	hypothetical protein
9631.m03948	AC133860	putative gibberellin regulated protein
9631.m03965	AC135501	expressed protein
9631.m03993	AC136972	expressed protein
9631.m03623	AC134887	hypothetical protein
9631.m04692	AC092779	expressed protein
9631.m04341	AC145381	expressed protein
9631.m04450	AC139174	expressed protein
9631.m04382	AC138004	expressed protein
9631.m04846	AC133334	hypothetical protein
9631.m04381	AC138004	expressed protein
9631.m05050	AC145380	expressed protein (with alternative splicing)
9631.m05489	AC092781	expressed protein
9631.m04539	AC133930	New cDNA-based Gene
9631.m04594	AC079830	expressed protein
9631.m05082	AC120983	expressed protein
9631.m03810	AC135564	expressed protein
9631.m02946	AC120538	expressed protein
9631.m03437	AC084831	expressed protein
9631.m03426	AC091234	expressed protein
9631.m04098	AC092780	expressed protein
9631.m04145	AC146816	F-box domain, putative
9631.m04455	AC137991	expressed protein
9631.m04220	AC120505	hypothetical protein
9631.m03686	AC128645	expressed protein
9631.m04193	AC145379	hypothetical protein
9631.m04001	AC136972	expressed protein
9631.m03966	AC135501	expressed protein
9631.m03834	AC120537	hypothetical protein
9631.m03626	AC134887	expressed protein
9631.m03955	AC135501	expressed protein
9631.m04418	AC135600	expressed protein
9631.m04456	AC137991	expressed protein (with alternative splicing)
9631.m05216	AC092558	expressed protein
9631.m03969	AC135501	expressed protein
9631.m04504	AC135792	expressed protein
9631.m04444	AC139174	expressed protein
9631.m04571	AC090683	expressed protein
9631.m02704	AC099323	expressed protein (with alternative splicing)
9631.m02757	AC079853	expressed protein
9631.m03172	AC106887	hypothetical protein
9631.m03170	AC106887	hypothetical protein
9631.m03602	AC093312	expressed protein
9631.m03120	AC099041	expressed protein
9631.m02216	AC131175	hypothetical protein
9631.m03852	AC109602	expressed protein
9631.m02157	AC137699	expressed protein
9631.m02995	AC145386	expressed protein
9631.m04248	AC147427	expressed protein
9631.m04861	AC091775	hypothetical protein
9631.m04457	AC137991	expressed protein (with alternative splicing)
9631.m02514	AC087220	expressed protein
9631.m03160	AC106887	hypothetical protein
9631.m03455	AC133337	retrotransposon protein, putative, unclassified
9631.m03431	AC084831	hypothetical protein
9631.m02938	AC120529	expressed protein
9631.m02343	AC137073	expressed protein
9631.m02344	AC137073	expressed protein
9631.m02368	AC137076	expressed protein
9631.m03371	AC137925	expressed protein
9631.m03046	AC114983	hypothetical protein
9631.m02663	AC103551	RNA recognition motif. (a.k.a. RRM, RBD, or RNP domain), putative
9631.m02922	AC092262	expressed protein
9631.m02812	AC118134	retrotransposon protein, putative, unclassified
9631.m02188	AC134885	expressed protein
9631.m03202	AC093180	retrotransposon protein, putative, Ty3-gypsy sub-class
9631.m03060	AC114983	New cDNA-based Gene
9631.m01617	AC134238	expressed protein
9631.m01934	AC134769	expressed protein
9631.m02512	AC087220	expressed protein
9631.m02030	AC119748	VQ motif, putative
9631.m01405	AC134235	expressed protein
9631.m01866	AC118668	expressed protein
9631.m02340	AC137073	expressed protein
9631.m02796	AC084295	expressed protein
9631.m02655	AC146915	expressed protein
9631.m02705	AC099323	expressed protein (with alternative splicing)
9631.m02341	AC137073	expressed protein
9631.m03051	AC114983	expressed protein
9631.m03165	AC106887	putative retrotransposons protein
9631.m02963	AC120538	hypothetical protein
9631.m02915	AC092262	expressed protein
9631.m01371	AC118672	expressed protein
9631.m01142	AC105364	expressed protein
9631.m02447	AC125784	expressed protein
9631.m01797	AC137072	hypothetical protein
9631.m02016	AC119748	expressed protein
9631.m02279	AC135257	expressed protein
9631.m02268	AC134231	expressed protein
9631.m01606	AC135207	expressed protein
9631.m02131	AC132215	retrotransposon protein, putative, Ty3-gypsy sub-class
9631.m02247	AC118675	hypothetical protein
9631.m01719	AC084405	expressed protein
9631.m01916	AC134769	expressed protein
9631.m01126	AC104474	hypothetical protein
9631.m01793	AC137072	expressed protein
9631.m01811	AC137072	expressed protein
9631.m01322	AC134239	expressed protein
9631.m00845	AC121489	expressed protein
9631.m00711	AC126221	expressed protein
9631.m01063	AC134241	expressed protein
9631.m01374	AC118672	hypothetical protein
9631.m00216	AC098695	hypothetical protein
9631.m01478	AC135495	expressed protein
9631.m00944	AC115687	expressed protein
9631.m02034	AC119748	expressed protein
9631.m00710	AC126221	expressed protein
9631.m01882	AC137267	hypothetical protein
9631.m01103	AC105732	expressed protein
9631.m01404	AC134235	expressed protein
9631.m01933	AC134769	expressed protein
9631.m02158	AC137699	expressed protein
9631.m02394	AC107619	expressed protein
9631.m00768	AC125472	expressed protein
9631.m01355	AC129008	expressed protein
9631.m00923	AC116426	expressed protein
9631.m01192	AC104473	hypothetical protein
9631.m01149	AC105364	expressed protein
9631.m01649	AC137698	expressed protein
9631.m00254	AC119747	expressed protein
9631.m00386	AC137930	hypothetical protein
9631.m00174	AC134236	expressed protein
9631.m00816	AC125471	expressed protein
9631.m01259	AC137696	hypothetical protein
9631.m01240	AC103891	hypothetical protein
9631.m00770	AC125472	expressed protein
9630.m05530	AP005616	expressed protein
9631.m01349	AC129008	hypothetical protein
9631.m01605	AC135207	expressed protein
9631.m00469	AC105734	expressed protein
9631.m01129	AC104474	retrotransposon protein, putative, Ty3-gypsy sub-class
9631.m00115	AC121490	expressed protein
9630.m05772	AP003989	F-box domain, putative
9631.m00002	AC097627	expressed protein
9631.m00047	AC118673	expressed protein
9631.m01372	AC118672	expressed protein
9631.m00648	AC073556	putative embryo-specific protein
9631.m01370	AC118672	hypothetical protein
9631.m01040	AC104179	expressed protein
9630.m05806	AP004776	transposon protein, putative, CACTA, En/Spm sub-class
9631.m00592	AC105729	hypothetical protein
9631.m00493	AC137635	expressed protein
9631.m00518	AC134233	expressed protein
9630.m05515	AP005295	expressed protein
9631.m00200	AC105363	expressed protein
9631.m00041	AC118673	expressed protein
9630.m05768	AP004026	hypothetical protein
9630.m05452	AP004054	expressed protein
9631.m00056	AC107224	hypothetical protein
9630.m05601	AP004064	expressed protein
9630.m05508	AP003975	expressed protein
9630.m05175	AP005002	expressed protein
9631.m00243	AC119747	expressed protein
9630.m05590	AP004064	expressed protein
9631.m00263	AC104427	hypothetical protein
9631.m00040	AC118673	expressed protein
9631.m00275	AC144426	expressed protein
9631.m00984	AC123568	expressed protein
9630.m05531	AP005616	expressed protein
9630.m05299	AP004853	expressed protein
9631.m00700	AC126221	expressed protein
9630.m05516	AP005295	expressed protein
9630.m05525	AP005295	expressed protein
9631.m00260	AC104427	expressed protein
9631.m00245	AC119747	hypothetical protein
9630.m04165	AP004839	expressed protein
9630.m05163	AP005002	expressed protein
9630.m05592	AP004064	expressed protein
9630.m05292	AP004853	expressed protein
9630.m05150	AP004159	expressed protein
9630.m04905	AP005319	hypothetical protein
9630.m05286	AP004853	hypothetical protein
9630.m05332	AP004846	expressed protein
9630.m05536	AP005616	expressed protein
9630.m04574	AP004778	expressed protein
9631.m00129	AC121490	expressed protein
9630.m05593	AP004064	expressed protein
9631.m00039	AC118673	expressed protein
9630.m05274	AP004068	expressed protein
9630.m05709	AP004048	expressed protein
9630.m05511	AP005295	hypothetical protein
9631.m00116	AC121490	expressed protein
9630.m05664	AP004120	expressed protein
9630.m04970	AP004815	hypothetical protein
9630.m04668	AP005844	hypothetical protein
9630.m04553	AP005859	expressed protein
9630.m04952	AP005112	expressed protein
9630.m04916	AP005319	expressed protein
9630.m04362	AP004188	expressed protein
9630.m05642	AP005691	hypothetical protein
9630.m05136	AP004814	expressed protein
9630.m04817	AP005113	expressed protein
9630.m04975	AP004815	hypothetical protein
9630.m04259	AP005289	expressed protein
9630.m03845	AP005286	expressed protein
9630.m03640	AP005874	expressed protein
9630.m03348	AP004017	retrotransposon protein, putative, unclassified
9630.m03418	AP004865	expressed protein
9630.m04234	AP004676	expressed protein
9630.m03830	AP004063	hypothetical protein
9630.m04184	AP004175	expressed protein
9630.m03300	AP004038	expressed protein
9630.m03905	AP003980	expressed protein
9630.m04719	AP004165	expressed protein
9630.m04258	AP005289	expressed protein
9630.m03804	AP004881	expressed protein
9630.m03942	AP004059	expressed protein
9630.m04779	AP005052	expressed protein
9630.m03664	AP004023	expressed protein
9630.m04000	AP006168	hypothetical protein
9630.m03566	AP005800	expressed protein
9630.m04329	AP004139	expressed protein
9630.m04648	AP005844	hypothetical protein
9630.m03896	AP004097	hypothetical protein
9630.m03488	AP005116	expressed protein
9630.m03588	AP005644	expressed protein
9630.m03589	AP005644	expressed protein
9630.m02929	AP005841	expressed protein
9630.m03817	AP004881	hypothetical protein
9630.m03578	AP005644	expressed protein
9630.m04066	AP004067	expressed protein
9630.m04042	AP004192	expressed protein
9630.m03698	AP005384	F-box domain, putative
9630.m03147	AP004156	hypothetical protein
9630.m03707	AP005384	F-box domain, putative
9630.m03210	AP004877	expressed protein
9630.m03718	AP005293	expressed protein
9630.m04423	AP005823	hypothetical protein
9630.m03723	AP005293	hypothetical protein
9630.m03805	AP004881	expressed protein
9630.m03811	AP004881	hypothetical protein
9630.m03814	AP004881	expressed protein
9630.m04096	AP004768	expressed protein
9630.m03565	AP005800	expressed protein
9630.m03601	AP005643	expressed protein
9630.m03944	AP004053	hypothetical protein
9630.m03048	AP005749	expressed protein
9630.m02762	AP005317	expressed protein
9630.m03252	AP005771	hypothetical protein
9630.m03009	AP006439	expressed protein
9630.m03094	AP004777	hypothetical protein
9630.m03258	AP005771	expressed protein
9630.m03271	AP005611	expressed protein
9630.m03214	AP004877	expressed protein
9630.m03731	AP005385	hypothetical protein
9630.m02817	AP004086	expressed protein
9630.m03071	AP004772	expressed protein
9630.m03122	AP005110	hypothetical protein
9630.m03699	AP005384	expressed protein
9630.m03665	AP004023	hypothetical protein
9630.m03056	AP005749	expressed protein
9630.m02284	AP004151	retrotransposon protein, putative, unclassified
9630.m03017	AP006439	expressed protein
9630.m02763	AP005317	expressed protein
9630.m03034	AP005842	expressed protein
9630.m03057	AP005749	expressed protein
9630.m01875	AP005534	expressed protein
9630.m03074	AP004772	expressed protein
9630.m02403	AP004816	expressed protein
9630.m02775	AP005317	expressed protein
9630.m02035	AP004798	F-box domain, putative
9630.m03049	AP005749	hypothetical protein
9630.m03058	AP005749	hypothetical protein
9630.m02531	AP004850	hypothetical protein
9630.m02058	AP005651	expressed protein
9630.m02310	AP004134	expressed protein
9630.m00901	AP005785	expressed protein
9630.m02069	AP005612	expressed protein
9630.m01869	AP005534	hypothetical protein
9630.m01916	AP005310	transposon protein, putative, CACTA, En/Spm sub-class
9630.m02039	AP004798	hypothetical protein
9630.m02435	AP005696	retrotransposon protein, putative, Ty3-gypsy sub-class
9630.m01471	AP003993	expressed protein
9630.m01747	AP004001	hypothetical protein
9630.m02722	AP005322	expressed protein
9630.m01134	AP005846	hypothetical protein
9630.m02160	AP004854	hypothetical protein
9630.m02358	AP005648	hypothetical protein
9630.m01912	AP005310	hypothetical protein
9630.m02797	AP004999	expressed protein
9630.m01764	AP004168	F-box domain, putative
9630.m01431	AP004018	expressed protein
9630.m00813	AP004087	expressed protein
9630.m01389	AP005614	expressed protein
9630.m01073	AP003977	hypothetical protein
9630.m01100	AP004085	expressed protein
9630.m00546	AP004871	expressed protein
9630.m01946	AP005743	hypothetical protein
9630.m01941	AP005743	hypothetical protein
9630.m01627	AP004771	hypothetical protein
9630.m01447	AP004875	hypothetical protein
9630.m01676	AP004872	expressed protein
9630.m01416	AP005511	F-box domain, putative
9630.m01455	AP004875	expressed protein
9630.m02100	AP004890	hypothetical protein
9630.m01499	AP005803	hypothetical protein
9630.m01428	AP004018	hypothetical protein
9630.m01294	AP004030	expressed protein
9629.m07349	AP003277	hypothetical protein
9630.m00417	AP005776	expressed protein
9629.m07298	AP003448	expressed protein
9630.m00815	AP004066	expressed protein
9630.m00870	AP004046	expressed protein
9630.m00612	AP004093	expressed protein
9630.m01301	AP004030	hypothetical protein
9630.m00879	AP004046	expressed protein
9630.m01093	AP004085	expressed protein
9630.m00611	AP004093	expressed protein
9630.m00613	AP004093	expressed protein
9630.m00972	AP004812	expressed protein
9630.m00996	AP004869	hypothetical protein
9630.m01092	AP004085	expressed protein
9630.m00722	AP005772	hypothetical protein
9630.m00562	AP004871	expressed protein
9630.m01070	AP003977	expressed protein
9630.m01094	AP004085	expressed protein
9630.m00868	AP004046	expressed protein
9630.m01765	AP004168	F-box domain, putative
9630.m00825	AP004066	expressed protein
9630.m00251	AP005311	expressed protein
9630.m00269	AP004886	expressed protein
9630.m00274	AP004886	expressed protein
9630.m00327	AP004799	expressed protein
9630.m00462	AP005288	expressed protein
9630.m00287	AP004150	expressed protein
9630.m00344	AP005474	expressed protein
9630.m00720	AP005772	expressed protein
9630.m00721	AP005772	expressed protein
9630.m00781	AP004840	expressed protein
9630.m00254	AP005311	expressed protein
9630.m00355	AP005474	expressed protein
9630.m00400	AP005721	expressed protein
9630.m00438	AP005649	hypothetical protein
9630.m00413	AP005776	expressed protein
9629.m07409	AP003228	hypothetical protein
9630.m00238	AP005311	hypothetical protein
9630.m00253	AP005311	expressed protein
9630.m00892	AP005849	expressed protein
9630.m00939	AP004184	expressed protein
9630.m00203	AP005851	expressed protein
9630.m00964	AP004812	expressed protein
9630.m00503	AP005412	expressed protein
9630.m00615	AP004093	expressed protein
9630.m01081	AP003977	expressed protein
9630.m01119	AP004039	hypothetical protein
9630.m00763	AP004838	expressed protein
9630.m00250	AP005311	expressed protein
9630.m00252	AP005311	expressed protein
9630.m01082	AP003977	expressed protein
9630.m00502	AP005412	expressed protein
9630.m00476	AP005191	hypothetical protein
9629.m06652	AP003407	hypothetical protein
9629.m07044	AP003269	expressed protein
9629.m07076	AP004031	hypothetical protein
9629.m07229	AP003238	expressed protein
9629.m06776	AP003416	expressed protein
9629.m06778	AP003416	expressed protein
9629.m06810	AP003436	expressed protein
9629.m06894	AP006167	hypothetical protein
9630.m00354	AP005474	expressed protein
9629.m07299	AP003448	expressed protein
9630.m00125	AP004090	hypothetical protein
9629.m07035	AP003269	expressed protein
9629.m07075	AP004031	expressed protein
9629.m07189	AP004326	hypothetical protein
9630.m00380	AP005647	expressed protein
9630.m00461	AP005288	expressed protein
9629.m07278	AP004365	expressed protein
9630.m00008	AP005873	expressed protein
9630.m00031	AP004187	expressed protein
9630.m00129	AP004867	expressed protein
9629.m06963	AP004330	expressed protein
9629.m07236	AP003263	expressed protein
9629.m07316	AP003448	expressed protein
9630.m00070	AP004851	hypothetical protein
9629.m07116	AP003259	hypothetical protein
9629.m07239	AP003263	hypothetical protein
9629.m06859	AP003437	transposon protein, putative, CACTA, En/Spm sub-class
9629.m06911	AP004672	expressed protein
9629.m06830	AP003433	expressed protein
9629.m06627	AP003407	hypothetical protein
9629.m06829	AP003433	expressed protein
9629.m06459	AP003235	expressed protein
9629.m06891	AP006167	expressed protein
9629.m06687	AP003349	expressed protein
9629.m06507	AP003261	expressed protein
9629.m06368	AP003287	expressed protein
9629.m06041	AP003734	expressed protein
9629.m07185	AP004368	hypothetical protein
9630.m00078	AP004769	expressed protein
9630.m00126	AP004867	expressed protein
9629.m07023	AP003269	expressed protein
9629.m07039	AP003269	expressed protein
9629.m07131	AP003735	EF hand, putative
9630.m00077	AP004769	expressed protein
9629.m07021	AP003266	hypothetical protein
9629.m07083	AP004073	hypothetical protein
9629.m06828	AP003433	expressed protein
9630.m00128	AP004867	expressed protein
9629.m07237	AP003263	expressed protein
9629.m06773	AP003416	hypothetical protein
9629.m07081	AP004073	hypothetical protein
9629.m06280	AP003279	expressed protein
9629.m06157	AP003241	hypothetical protein
9629.m06515	AP003261	expressed protein
9629.m06598	AP003431	expressed protein
9629.m06130	AP003231	hypothetical protein
9629.m06925	AP004332	hypothetical protein
9629.m06382	AP003611	expressed protein
9629.m06600	AP003431	expressed protein
9629.m05976	AP003348	expressed protein
9629.m05993	AP003230	expressed protein
9629.m06231	AP003242	hypothetical protein
9629.m05702	AP003290	expressed protein
9629.m05703	AP003290	expressed protein
9629.m05598	AP003224	expressed protein
9629.m05607	AP003224	expressed protein
9629.m05572	AP003344	expressed protein
9629.m05008	AP003408	expressed protein
9629.m05048	AP003453	expressed protein
9629.m05878	AP004331	expressed protein
9629.m05365	AP003249	expressed protein
9629.m05409	AP003409	hypothetical protein
9629.m05383	AP003268	expressed protein
9629.m05567	AP003344	expressed protein
9629.m05722	AP003299	expressed protein
9629.m05721	AP003299	expressed protein
9629.m06127	AP003231	expressed protein
9629.m06153	AP003241	expressed protein
9629.m05772	AP003221	expressed protein
9629.m04826	AP003248	expressed protein
9629.m05574	AP003344	hypothetical protein
9629.m04881	AP003254	expressed protein
9629.m04418	AP003792	retrotransposon protein, putative, Ty3-gypsy sub-class
9629.m04692	AP003335	Heavy-metal-associated domain, putative
9629.m04806	AP003450	expressed protein
9629.m05233	AP002972	expressed protein
9629.m04750	AP003452	expressed protein
9629.m04768	AP003455	hypothetical protein
9629.m04919	AP003245	hypothetical protein
9629.m04362	AP003725	Tat (twin-arginine translocation) pathway signal sequence, putative
9629.m04808	AP003450	expressed protein
9629.m04369	AP002910	expressed protein
9629.m04780	AP003455	hypothetical protein
9629.m05554	AP003265	F-box domain, putative
9629.m05565	AP003344	expressed protein
9629.m05234	AP002972	hypothetical protein
9629.m05367	AP003249	expressed protein
9629.m05363	AP003249	expressed protein
9629.m05375	AP003268	expressed protein
9629.m05526	AP003106	hypothetical protein
9629.m05442	AP003274	expressed protein
9629.m05141	AP002899	expressed protein
9629.m03784	AP002908	hypothetical protein
9629.m04833	AP003248	expressed protein
9629.m05283	AP003376	expressed protein
9629.m04721	AP004363	hypothetical protein
9629.m04755	AP003452	hypothetical protein
9629.m04722	AP004363	expressed protein
9629.m05001	AP003410	hypothetical protein
9629.m04399	AP003234	hypothetical protein
9629.m04448	AP003710	hypothetical protein
9629.m04871	AP003254	expressed protein
9629.m04371	AP002910	expressed protein
9629.m04534	AP003284	expressed protein
9629.m04640	AP003223	F-box domain, putative
9629.m04037	AP003303	expressed protein
9629.m05571	AP003344	expressed protein
9629.m05055	AP003453	expressed protein
9629.m03520	AP003933	expressed protein
9629.m03657	AP003296	expressed protein
9629.m03269	AP003350	expressed protein
9629.m04230	AP003220	expressed protein
9629.m04100	AP003314	hypothetical protein
9629.m03693	AP003334	hypothetical protein
9629.m03892	AP003243	expressed protein
9629.m04163	AP003328	expressed protein
9629.m03781	AP002908	expressed protein
9629.m03932	AP003253	expressed protein
9629.m04181	AP002819	expressed protein
9629.m04253	AP003681	expressed protein
9629.m04159	AP003328	hypothetical protein
9629.m04974	AP002901	expressed protein
9629.m04986	AP002901	hypothetical protein
9629.m03715	AP003308	hypothetical protein
9629.m03844	AP003341	expressed protein
9629.m03945	AP003253	F-box domain, putative
9629.m03053	AP003435	expressed protein
9629.m03160	AP003563	expressed protein
9629.m03528	AP003933	hypothetical protein
9629.m03519	AP003933	hypothetical protein
9629.m03624	AP003267	hypothetical protein
9629.m03416	AP004361	bZIP transcription factor, putative
9629.m03782	AP002908	expressed protein
9629.m03023	AP003217	expressed protein
9629.m03029	AP003435	hypothetical protein
9629.m03041	AP003435	expressed protein
9629.m03469	AP004614	hypothetical protein
9629.m03385	AP003516	hypothetical protein
9629.m03031	AP003435	expressed protein
9629.m03521	AP003933	expressed protein
9629.m03477	AP004614	expressed protein
9629.m02367	AP003205	expressed protein
9629.m03568	AP003372	F-box domain, putative
9629.m03596	AP003924	expressed protein
9629.m03049	AP003435	F-box domain, putative
9629.m03138	AP004222	F-box domain, putative
9629.m03324	AP004362	expressed protein
9629.m02675	AP002968	retrotransposon protein, putative, Ty3-gypsy sub-class
9629.m03276	AP003447	hypothetical protein
9629.m02834	AP004767	hypothetical protein
9629.m03195	AP006233	expressed protein
9629.m03159	AP003563	hypothetical protein
9629.m03267	AP003350	expressed protein
9629.m03245	AP003350	expressed protein
9629.m02730	AP003536	expressed protein
9629.m02361	AP003205	hypothetical protein
9629.m03935	AP003253	expressed protein
9629.m03671	AP003141	expressed protein
9629.m03070	AP003077	hypothetical protein
9629.m03460	AP004231	hypothetical protein
9629.m03503	AP004258	expressed protein
9629.m03599	AP003924	expressed protein
9629.m02149	AP004358	expressed protein
9629.m02554	AP003021	hypothetical protein
9629.m01990	AP004253	expressed protein
9629.m02017	AP003722	hypothetical protein
9629.m02307	AP003337	hypothetical protein
9629.m01670	AP000837	hypothetical protein
9629.m02258	AP003208	expressed protein
9629.m01658	AP001081	expressed protein
9629.m01683	AP000836	expressed protein
9629.m02021	AP003722	expressed protein
9629.m02304	AP003337	expressed protein
9629.m02972	AP003144	expressed protein
9629.m02362	AP003205	expressed protein
9629.m02562	AP003856	hypothetical protein
9629.m01699	AP001072	VQ motif, putative
9629.m01341	AP002855	expressed protein
9629.m01656	AP001081	expressed protein
9629.m01788	AP002070	hypothetical protein
9629.m01342	AP002855	expressed protein
9629.m01355	AP002855	hypothetical protein
9629.m01978	AP004253	expressed protein
9629.m02047	AP003535	expressed protein
9629.m02929	AP004224	hypothetical protein
9629.m01548	AP002817	expressed protein
9629.m01018	AP003105	expressed protein
9629.m01006	AP003105	expressed protein
9629.m01040	AP001551	expressed protein
9629.m01272	AP001859	expressed protein
9629.m01098	AP002092	expressed protein
9629.m00799	AP003118	expressed protein
9629.m00804	AP003047	expressed protein
9629.m00692	AP003282	hypothetical protein
9629.m01008	AP003105	expressed protein
9629.m01091	AP002092	hypothetical protein
9629.m01523	AP002525	hypothetical protein
9629.m01885	AP003140	hypothetical protein
9629.m01918	AP003206	hypothetical protein
9629.m02303	AP003337	expressed protein
9629.m01693	AP000836	expressed protein
9629.m01710	AP001072	expressed protein
9629.m01786	AP002070	hypothetical protein
9629.m01323	AP001539	expressed protein
9629.m01945	AP002871	hypothetical protein
9629.m01360	AP003210	hypothetical protein
9629.m01430	AP003074	expressed protein
9629.m00371	AP003250	hypothetical protein
9629.m00482	AP002540	expressed protein
9629.m00559	AP003225	expressed protein
9629.m00357	AP003250	expressed protein
9629.m00433	AP003311	expressed protein
9629.m00438	AP003311	hypothetical protein
9629.m00881	AP002836	hypothetical protein
9629.m00725	AP003215	expressed protein
9629.m01076	AP002093	expressed protein
9629.m00889	AP002743	expressed protein
9629.m00698	AP003282	expressed protein
9629.m00862	AP002486	expressed protein
9629.m00387	AP002913	hypothetical protein
9629.m01160	AP002745	expressed protein
9629.m00737	AP003215	expressed protein
